# Supplementary material
Source: PubMed Central journal article supplement (PMC4339220)
Supplement: NIHMS622728-supplement-ESI_1.pdf [file NIHMS622728-supplement-ESI_1.pdf]

## Supplementary Information

### Modulation of DNA-Polyamide Interaction by $\beta$ -alanine Substitutions: A Study of Positional Effects on Binding Affinity, Kinetics and Thermodynamics

Shuo Wang<sup>1</sup>, Karl Aston<sup>2</sup>, Kevin J. Koeller<sup>2</sup>, G. Davis Harris, Jr.<sup>2</sup>, Nigam P. Rath<sup>2</sup>,  
James K. Bashkin<sup>2\*</sup>, W. David Wilson<sup>1\*</sup>

<sup>1</sup> Department of Chemistry, Center for Diagnostics and Therapeutics,  
Georgia State University, Atlanta, GA 30303, USA

<sup>2</sup> Department of Chemistry & Biochemistry, Center for Nanoscience,  
University of Missouri-St. Louis, St. Louis, MO 63121, USA

\* Address correspondence to either of these authors:

Tel: +1.404.413.5503; Fax: +1.404.413.5505. Email: wdw@gsu.edu

Tel: +1.314.516.7352; Fax: +1.314.516.5342. Email: bashkinj@umsl.edu

#### Table of Contents

|                  |                                                              |             |
|------------------|--------------------------------------------------------------|-------------|
| <b>Section 1</b> | Biophysical results<br>(Tables S1-2 and Figures S1-S6)       | Pages 2-9   |
| <b>Section 2</b> | Synthetic details<br>(Table S3 and Figures S7-S9)            | Pages 10-16 |
| <b>Section 3</b> | Crystallography<br>(X-ray Tables 1-18 and X-ray Figures 1-6) | Pages 17-45 |

## Section 1. Biophysical results

**Table S1.** Binding enthalpy ( $\Delta H$ ) of KA1033, KJK6021 and KA2127 determined by ITC.

| [ligand] ( $\mu\text{M}$ ) | 1/ [ligand]<br>( $\mu\text{M}^{-1}$ ) | Binding enthalpy ( $\Delta H$ , kcal mol $^{-1}$ ) |                 |                 |
|----------------------------|---------------------------------------|----------------------------------------------------|-----------------|-----------------|
|                            |                                       | KA1033                                             | KJK6021         | KA2127          |
| 10.0                       | 0.10                                  | --                                                 | $-0.3 \pm 0.1$  | $-2.2 \pm 0.1$  |
| 5.0                        | 0.20                                  | $-0.15 \pm 0.05$                                   | $-6.7 \pm 0.2$  | $-8.3 \pm 0.3$  |
| 3.3                        | 0.30                                  | $-4.4 \pm 0.1$                                     | $-11.7 \pm 0.2$ | $-11.9 \pm 0.2$ |
| 2.5                        | 0.40                                  | $-8.5 \pm 0.2$                                     | $-14.3 \pm 0.2$ | $-13.0 \pm 0.4$ |
| 2.0                        | 0.50                                  | $-11.8 \pm 0.2$                                    | $-13.9 \pm 0.2$ | $-12.9 \pm 0.3$ |
| 1.5                        | 0.67                                  | $-11.8 \pm 0.3$                                    | $-14.4 \pm 0.3$ | $-13.0 \pm 0.5$ |

\* Errors listed are the standard errors for the fit to the 1:1 binding model. The binding enthalpy for KA1033 with 10  $\mu\text{M}$  sample could not be measured due to the compound aggregation.

**Table S2.**  $\Delta T_m$  values of KA1033, KJK6021 and their derivatives with different counterions (KJK6053 and KJK6064, respectively) binding to their cognate and mutant DNA sequences\*. PAs are classified based on their C-terminus groups and counterions.

| DNA sequence | $T_m$ (°C) for free DNA | Dp group                                    |                               | Ta group                                     |                               |
|--------------|-------------------------|---------------------------------------------|-------------------------------|----------------------------------------------|-------------------------------|
|              |                         | KA1033<br>·CF <sub>3</sub> COO <sup>-</sup> | KJK6053<br>·HCOO <sup>-</sup> | KJK6064<br>·CF <sub>3</sub> COO <sup>-</sup> | KJK6021<br>·HCOO <sup>-</sup> |
| TGGAGA       | 67.7                    | 7.8                                         | 7.8                           | 9.1                                          | 8.8                           |
| 1.TGCAGA     | 69.8                    | 0.6                                         | 0.5                           | 2.5                                          | 2.6                           |
| 2.TGGCGA     | 75.0                    | 3.4                                         | 3.4                           | 5.1                                          | 5.0                           |
| 3.TGGATA     | 64.1                    | 6.9                                         | 6.7                           | 8.0                                          | 7.9                           |
| 4.TGGTGA     | 69.5                    | 9.0                                         | 8.9                           | 10.3                                         | 10.2                          |
| 5.TGAGGA     | 68.1                    | 4.3                                         | 4.5                           | 6.4                                          | 6.3                           |

\*The error of these  $\Delta T_m$  values is  $\pm 0.2$  °C, based on experimental reproducibility.

(A) **Cognate sequence:** 5' - CCT TGGAGA TTTT CTCTCCAAGG  
**Mutant sequences:** 1. 5' - CCT TG**C**AGA TTTT CTCT**C**CAAGG  
2. 5' - CCT TGG**C**GAG TTTT CTC**G**CCAAGG  
3. 5' - CCT TGGAT**A**G TTTT CT**A**TCCAAGG  
4. 5' - CCT TGGT**A**G TTTT CTC**A**CCAAGG  
5. 5' - CCT TG**A**GGAG TTTT CTC**C**TCAAGG

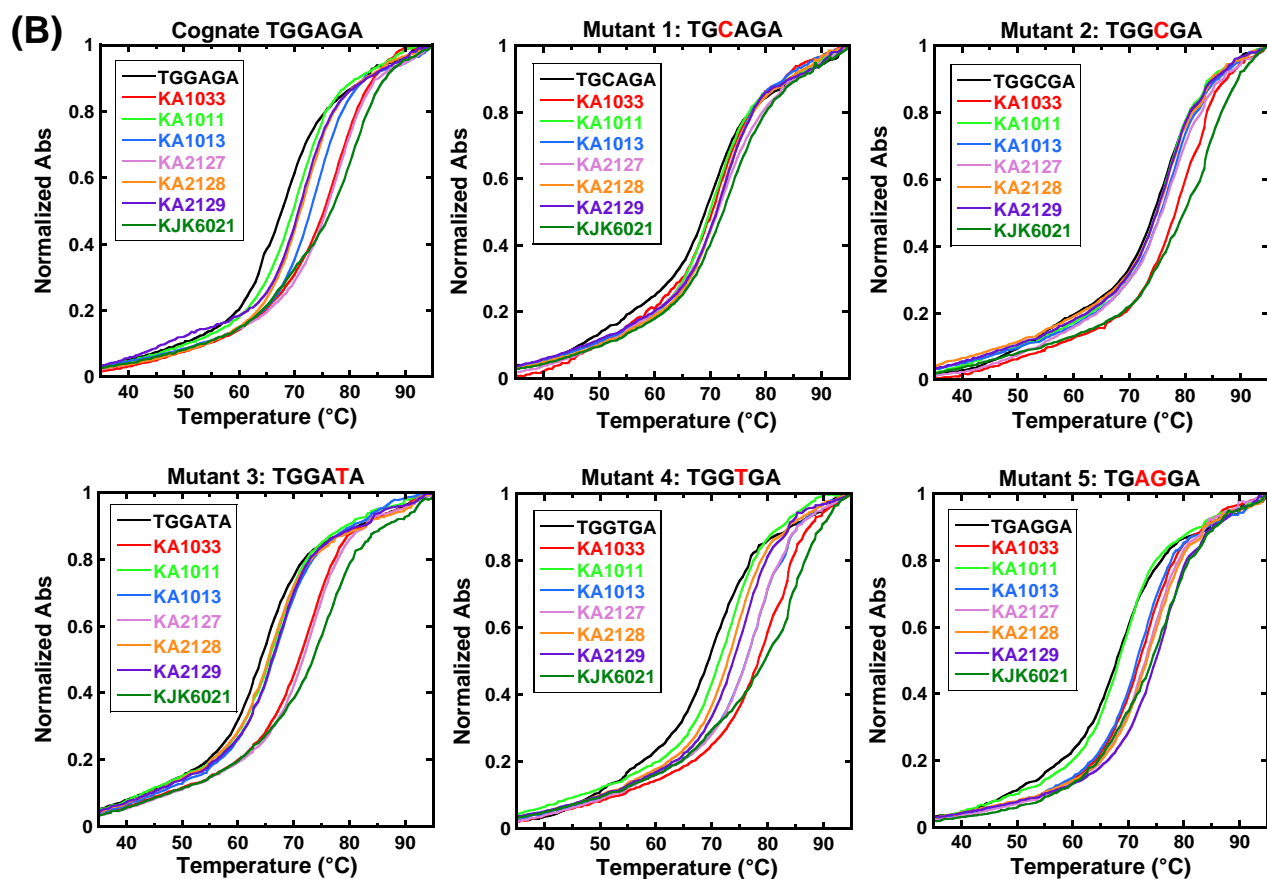

**Figure S1.** (A) Cognate and mutant DNA sequences. (B) Normalized melting curves for six PAs with cognate and mutant DNAs at 1:1 molar ratio.

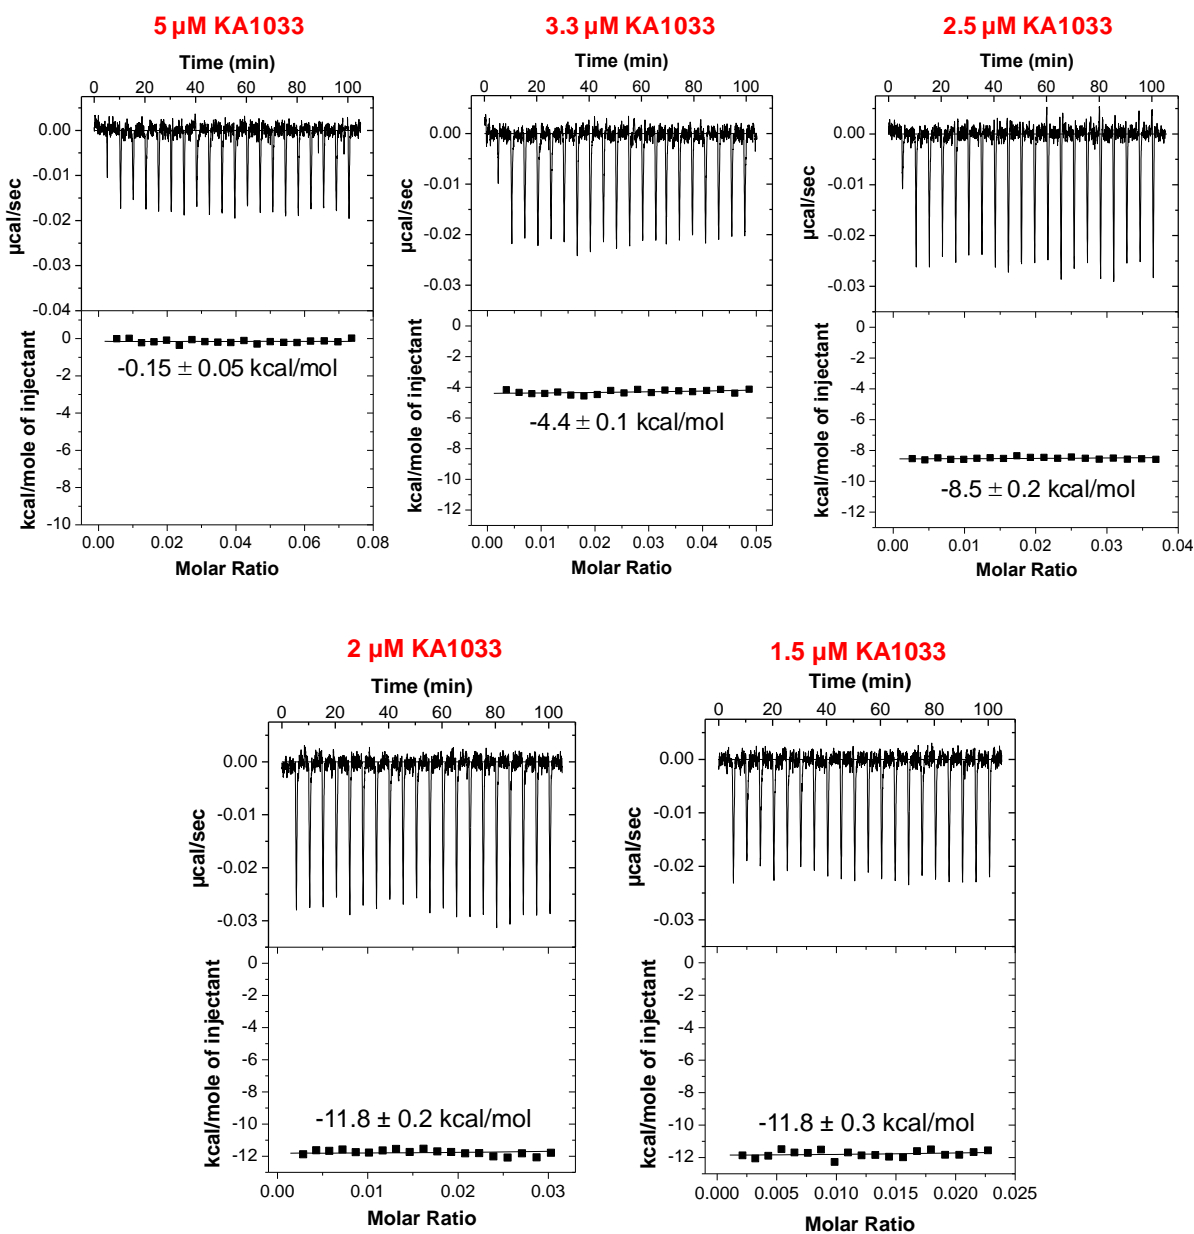

**Figure S2.** ITC titrations of 5, 3.3, 2.5, 2, 1.5  $\mu\text{M}$  of KA1033 into 10  $\mu\text{M}$  TGGAGA hairpin duplexes at 25  $^{\circ}\text{C}$  are shown at the top of each panel. The integrated heats after subtraction of the heat of dilution are plotted versus KA1033/DNA molar ratio in the bottom of each panel. Errors listed are the standard errors for the fit to the 1:1 binding model.

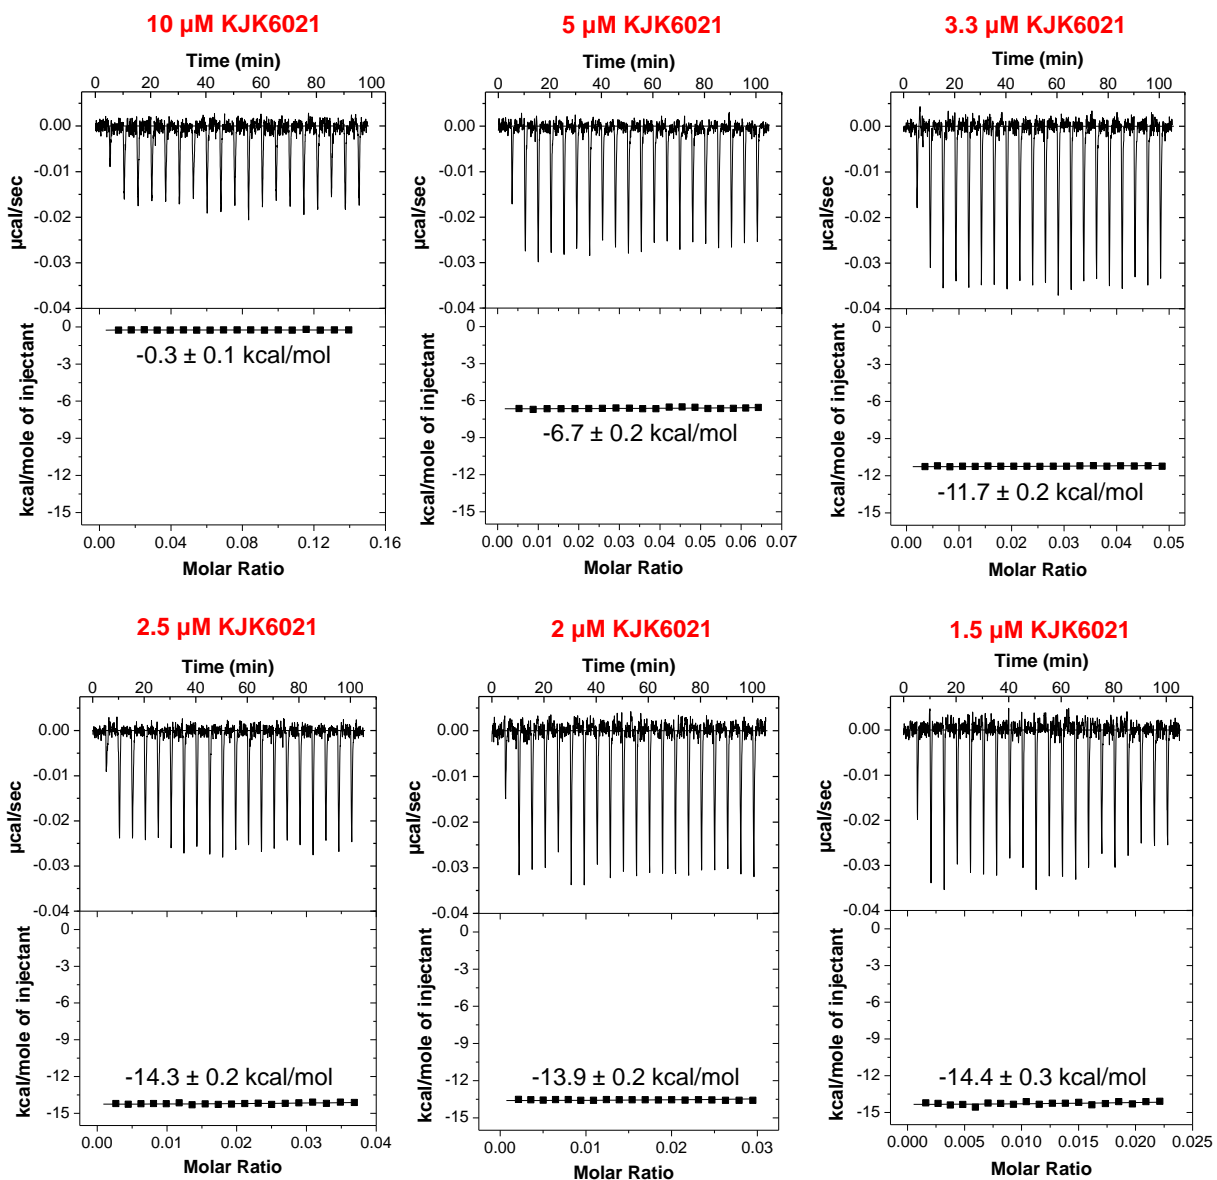

**Figure S3.** ITC titrations of 10, 5, 3.3, 2.5, 2, 1.5  $\mu\text{M}$  of KJK6021 into 10  $\mu\text{M}$  TGGAGA hairpin duplexes at 25  $^{\circ}\text{C}$  are shown at the top of each panel. The integrated heats after subtraction of the heat of dilution are plotted versus KJK6021/DNA molar ratio in the bottom of each panel. Errors listed are the standard errors for the fit to the 1:1 binding model.

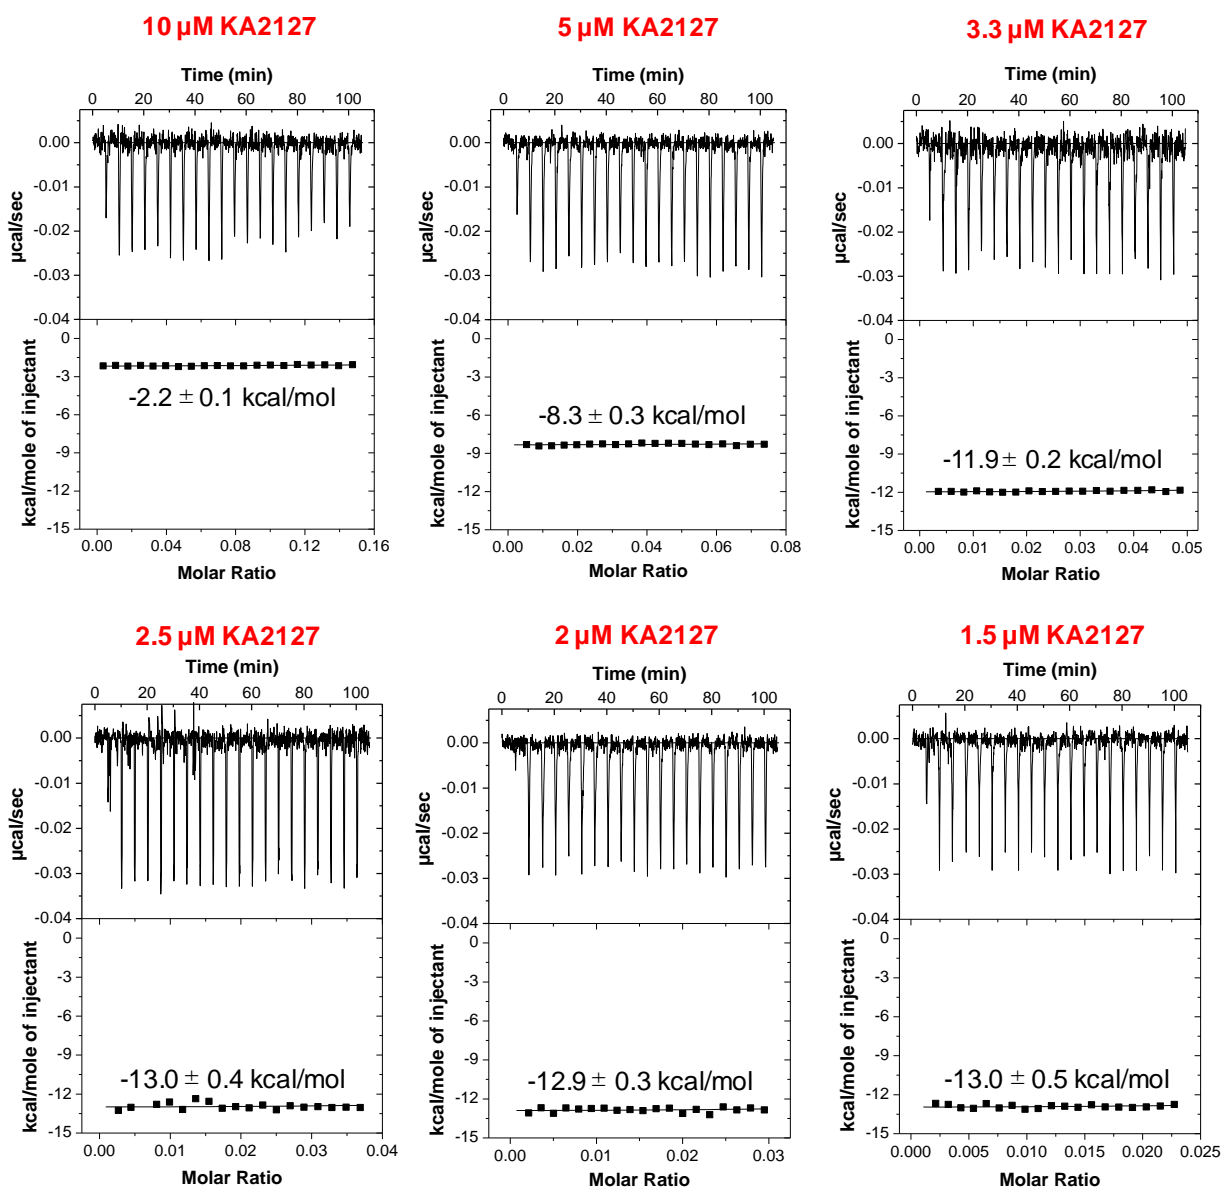

**Figure S4.** ITC titrations of 10, 5, 3.3, 2.5, 2, 1.5  $\mu\text{M}$  of KA2127 into 10  $\mu\text{M}$  TGGAGA hairpin duplexes at 25  $^{\circ}\text{C}$  are shown at the top of each panel. The integrated heats after subtraction of the heat of dilution are plotted versus KA2127/DNA molar ratio in the bottom of each panel. Errors listed are the standard errors for the fit to the 1:1 binding model.

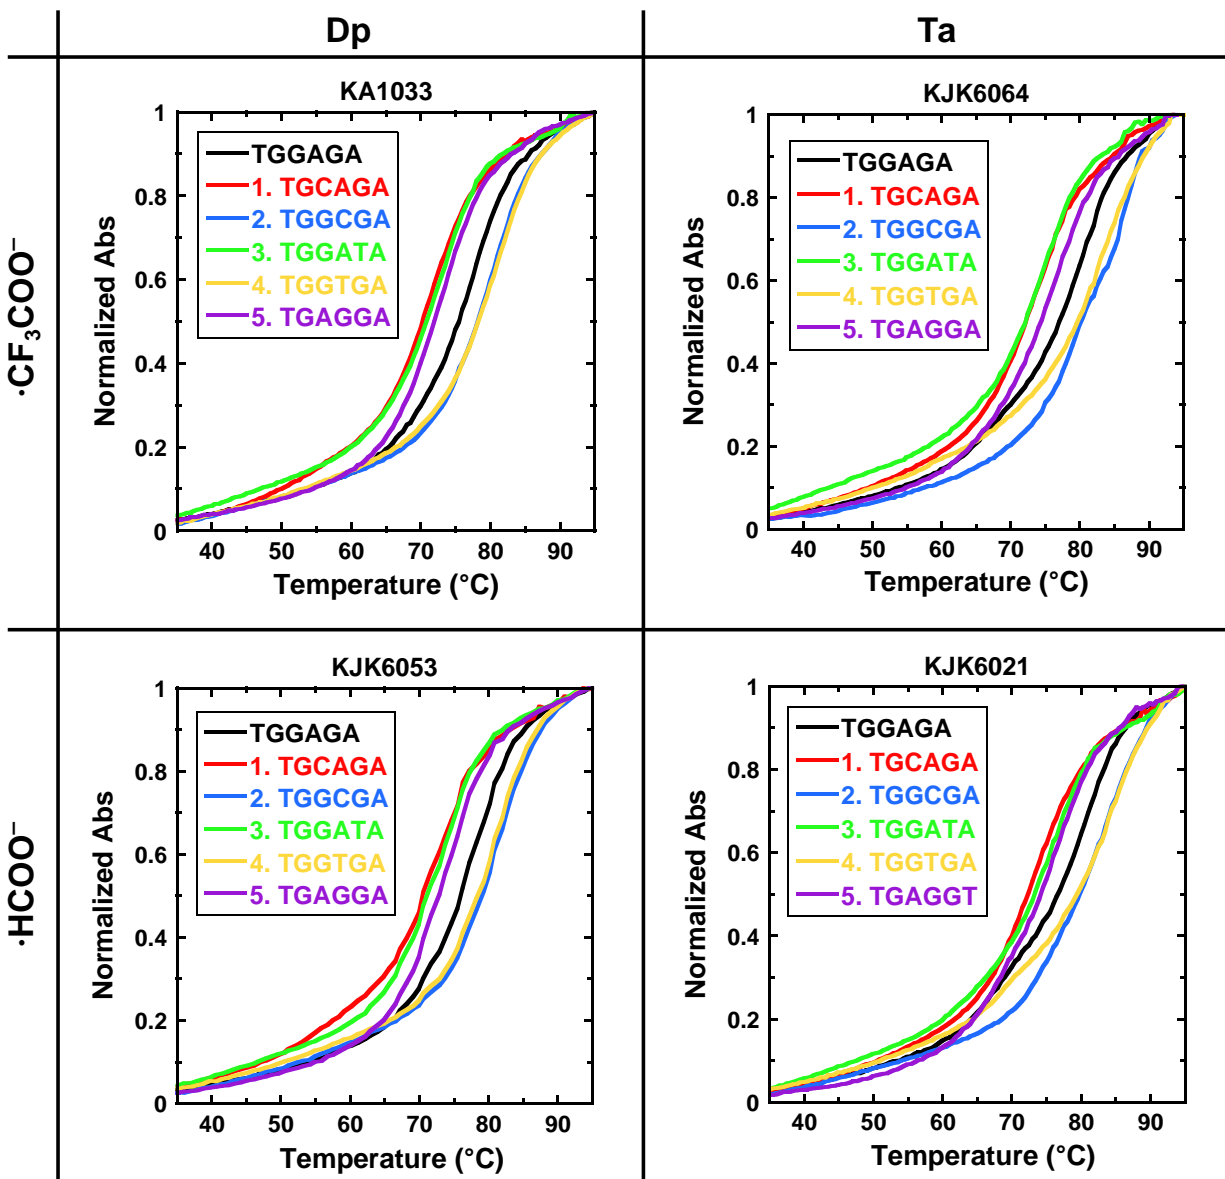

**Figure S5.** Normalized melting curves for KA1033, KJK6021, KJK6053 and KJK6064 with cognate and mutant DNAs at 1:1 molar ratio. PAs are classified based on their C-terminus groups and counterions.



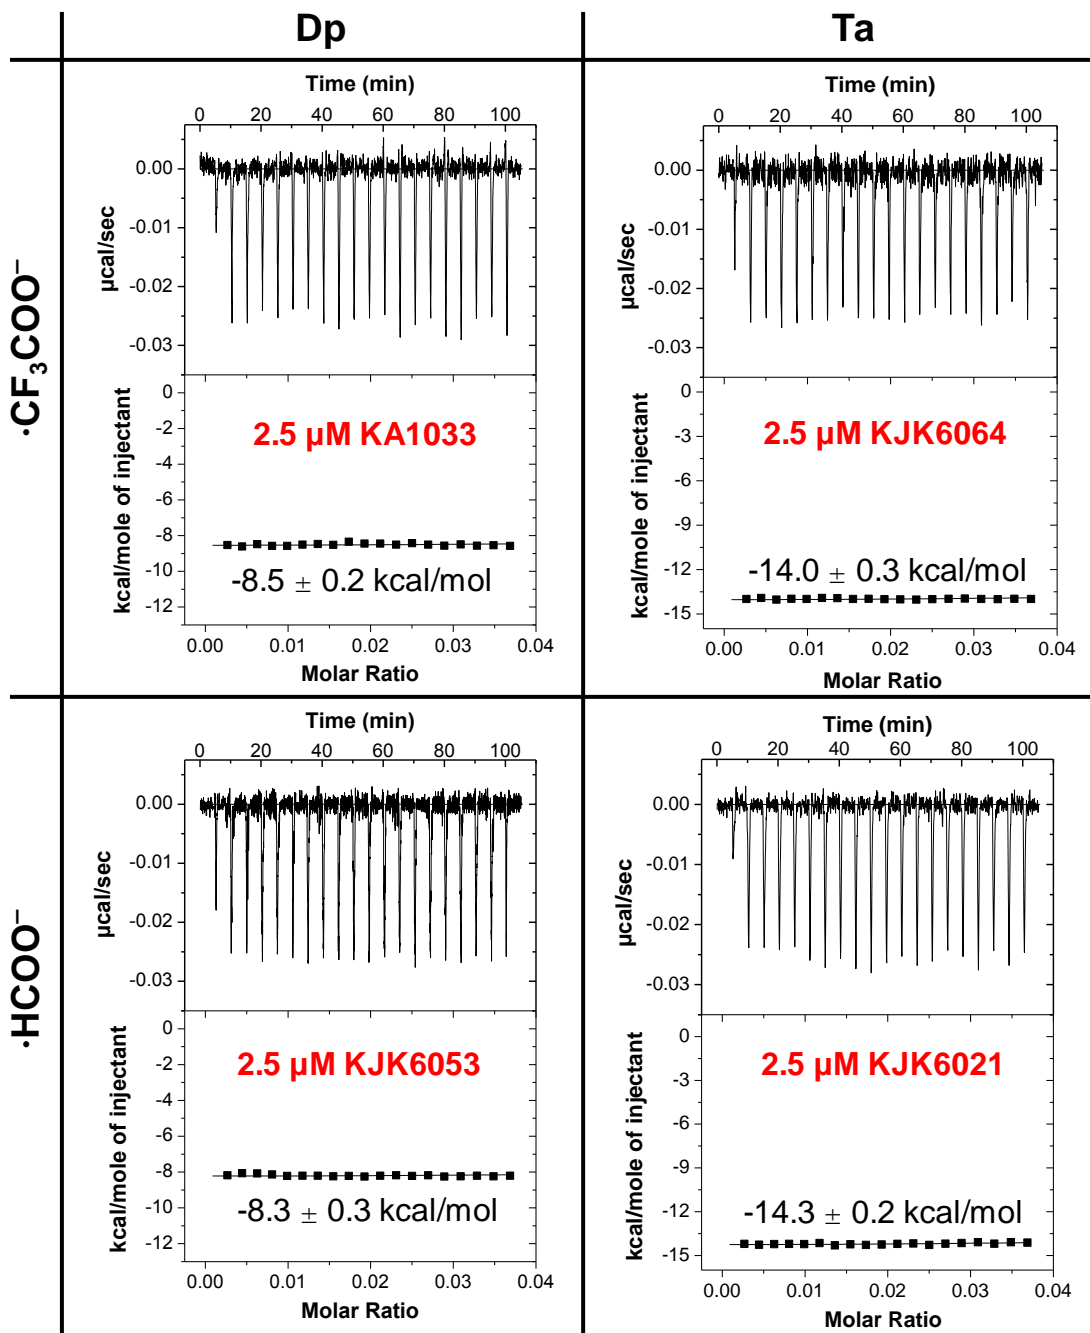

**Figure S6.** ITC titrations 2.5  $\mu\text{M}$  of KA1033, KJK6021, KJK6053 and KJK6064 into 10  $\mu\text{M}$  TGGAGA hairpin duplexes at 25  $^{\circ}\text{C}$  are shown at the top of each panel. The integrated heats after subtraction of the heat of dilution are plotted versus PA/DNA molar ratio in the bottom of each panel. Errors listed are the standard errors for the fit to the 1:1 binding model. PAs are classified based on their C-terminus groups and counterions.

## Section 2. Synthetic details

### Chemical Characterization, Use of Dimers in Polyamide Syntheses, and Dimer Syntheses

#### **KA1033 (ImImPyImyPyPyPyPyβDp TFA salt):**

<sup>1</sup>H NMR (500 MHz, DMSO-d<sub>6</sub>) δ = 10.28 (s, 1 H), 10.26 (s, 1 H), 9.93 (s, 1 H), 9.91 (s, 1 H), 9.89 (s, 1 H), 9.84 (s, 1 H), 9.76 (s, 1 H), 9.23 (br. s., 1 H), 8.09 - 8.00 (m, *J* = 5.7, 10.6, 10.6 Hz, 6 H), 7.58 (s, 1 H), 7.50 (s, 1 H), 7.46 (s, 1 H), 7.39 (d, *J* = 1.6 Hz, 1 H), 7.23 (d, *J* = 1.6 Hz, 1 H), 7.22 (d, *J* = 1.6 Hz, 1 H), 7.16 (s, 3 H), 7.08 (d, *J* = 1.0 Hz, 1 H), 7.07 (s, 2 H), 6.90 - 6.87 (m, 2 H), 4.01 (s, 6 H), 3.94 (s, 3 H), 3.86 (s, 3 H), 3.85 (s, 3 H), 3.84 (s, 3 H), 3.83 (s, 3 H), 3.80 (s, 3 H), 3.42 - 3.35 (m, 2 H), 3.33 - 3.26 (m, 2 H), 3.15 - 3.08 (m, 2 H), 3.04 - 2.97 (m, 2 H), 2.74 (d, *J* = 5.1 Hz, 6 H), 2.38 - 2.33 (m, 2 H), 2.28 (t, *J* = 7.5 Hz, 2 H), 1.85 - 1.78 (m, 2 H), 1.78 - 1.70 (m, 2 H)

EA calc'd for C<sub>57</sub>H<sub>70</sub>N<sub>22</sub>O<sub>10</sub> (7 CF<sub>3</sub>CO<sub>2</sub>H)(6 H<sub>2</sub>O): C, 40.04%; H, 4.21%; N, 14.47%. Found: C, 40.79%; H, 3.96%; N, 13.43%.

HRMS (ESI) calc'd for C<sub>57</sub>H<sub>71</sub>N<sub>22</sub>O<sub>10</sub> [MH]<sup>+</sup>, 1223.5724, found, 1223.5736.

#### **KA2127 (ImImPyImyPyβPyPyβTa formate salt):**

<sup>1</sup>H NMR (600 MHz, DMSO-d<sub>6</sub>) δ = 10.30 (s, 1 H), 10.30 (s, 1 H), 9.94 (s, 1 H), 9.89 (s, 1 H), 9.82 (s, 1 H), 8.35 (br. s., 2 H), 8.09 (t, *J* = 5.6 Hz, 1 H), 8.06 (t, *J* = 5.9 Hz, 1 H), 8.02 (t, *J* = 5.6 Hz, 1 H), 7.95 (t, *J* = 5.6 Hz, 1 H), 7.58 (s, 1 H), 7.49 (s, 1 H), 7.46 (s, 1 H), 7.39 (d, *J* = 1.8 Hz, 1 H), 7.17 (s, 2 H), 7.15 (d, *J* = 1.8 Hz, 1 H), 7.11 (d, *J* = 1.8 Hz, 1 H), 7.08 (s, 1 H), 6.86 (s, 1 H), 6.83 (s, 1 H), 6.65 (d, *J* = 1.8 Hz, 1 H), 4.01 (s, 6 H), 3.93 (s, 3 H), 3.86 (s, 3 H), 3.81 (s, 3 H), 3.79 (s, 3 H), 3.78 (s, 3 H), 3.42 (td, *J* = 7.0, 12.9 Hz, 2 H), 3.39 - 3.32 (m, *J* = 1.0, 1.0, 1.0 Hz, 2 H), 3.31 - 3.23 (m, *J* = 1.0, 1.0, 1.0 Hz, 2 H), 3.06 (q, *J* = 6.5 Hz, 2 H), 2.81 (t, *J* = 7.0 Hz, 2 H), 2.53 - 2.46 (m, 2 H), 2.36 - 2.29 (m, 4 H), 2.29 - 2.22 (m, 4 H), 2.09 (s, 3 H), 1.83 - 1.74 (m, 2 H), 1.70 - 1.60 (m, 2 H), 1.52 (quin, *J* = 6.9 Hz, 2 H)

<sup>13</sup>C NMR (151 MHz, DMSO-d<sub>6</sub>) δ = 170.4, 169.0, 167.8, 161.2, 158.7, 158.7, 158.4, 155.8, 155.6, 137.8, 136.0, 134.7, 134.4, 134.1, 127.7, 127.1, 122.8, 122.7, 122.2, 122.1, 121.9, 121.9, 121.4, 119.5, 118.2, 117.9, 117.6, 114.3, 114.1, 105.8, 104.2, 103.9, 103.4, 54.6, 54.3, 41.3, 40.0, 38.0, 37.7, 36.6, 36.3, 36.1, 36.0, 35.8, 35.6, 35.5, 35.5, 35.2, 35.2, 34.9, 33.1, 26.7, 25.6, 24.5

EA calc'd for C<sub>56</sub>H<sub>74</sub>N<sub>22</sub>O<sub>10</sub> (5 HCO<sub>2</sub>H): C, 50.69%; H, 5.86%; N, 21.32%. Found: C, 50.93%; H, 6.34%; N, 20.96%.

HRMS (ESI) calc'd for C<sub>56</sub>H<sub>74</sub>N<sub>22</sub>O<sub>10</sub> [M]<sup>+</sup>, 1214.5958, found, 1214.5952.

**KA2128 (ImImβImγPyβPyβTa formate salt):**

<sup>1</sup>H NMR (600 MHz, DMSO-d<sub>6</sub>) δ = 10.38 (s, 1 H), 9.94 (s, 1 H), 9.89 (s, 1 H), 9.80 (s, 1 H), 8.35 (br. s., 2 H), 8.24 (t, *J* = 5.6 Hz, 1 H), 8.14 - 8.06 (m, 1 H), 8.06 - 8.00 (m, 1 H), 8.00 - 7.91 (m, 2 H), 7.52 (s, 1 H), 7.43 (s, 1 H), 7.41 (s, 1 H), 7.18 (s, 2 H), 7.10 (s, 1 H), 7.05 (s, 1 H), 6.86 (s, 1 H), 6.83 (s, 1 H), 6.64 (s, 1 H), 3.99 (s, 3 H), 3.96 (s, 3 H), 3.89 (s, 3 H), 3.82 (s, 3 H), 3.79 (s, 3 H), 3.77 (s, 3 H), 3.54 - 3.46 (m, 2 H), 3.46 - 3.39 (m, *J* = 5.9 Hz, 2 H), 3.39 - 3.32 (m, 2 H), 3.29 - 3.21 (m, 2 H), 3.06 (q, *J* = 6.5 Hz, 2 H), 2.81 (t, *J* = 6.7 Hz, 2 H), 2.59 (t, *J* = 6.7 Hz, 2 H), 2.56 - 2.47 (m, 2 H), 2.33 (t, *J* = 7.0 Hz, 4 H), 2.25 (td, *J* = 7.3, 14.2 Hz, 4 H), 2.09 (s, 3 H), 1.77 (quin, *J* = 6.9 Hz, 2 H), 1.72 - 1.61 (m, 2 H), 1.57 - 1.48 (m, 2 H)

<sup>13</sup>C NMR (151 MHz, DMSO-d<sub>6</sub>) δ = 170.4, 169.0, 168.5, 167.8, 161.2, 158.7, 158.4, 158.3, 155.9, 137.8, 135.8, 134.7, 134.1, 133.9, 127.6, 127.0, 122.8, 122.7, 122.1, 121.9, 118.2, 117.9, 117.7, 113.9, 113.6, 104.2, 103.9, 103.4, 54.5, 54.3, 54.0, 41.3, 41.2, 40.0, 38.1, 37.7, 37.2, 36.6, 36.1, 36.0, 36.0, 35.8, 35.6, 35.5, 35.5, 35.1, 35.1, 34.9, 34.9, 34.9, 33.1, 26.7, 25.6, 24.6, 24.4

EA calc'd for C<sub>53</sub>H<sub>73</sub>N<sub>21</sub>O<sub>10</sub> (5 HCO<sub>2</sub>H): C, 49.96%; H, 6.00%; N, 21.09%. Found: C, 50.08; H, 6.57%; N, 21.38%.

HRMS (ESI) calc'd for C<sub>53</sub>H<sub>73</sub>N<sub>21</sub>O<sub>10</sub> [M]<sup>+</sup>, 1163.5849, found, 1163.5833.

**KA2129 (ImImβImγPyβPyβTa formate salt):**

<sup>1</sup>H NMR (600 MHz, DMSO-d<sub>6</sub>) δ = 10.37 (s, 1 H), 9.87 (s, 1 H), 9.86 (s, 1 H), 9.83 (s, 1 H), 9.79 (br. s., 1 H), 8.23 (t, *J* = 6.2 Hz, 1 H), 8.15 (s, 1 H), 8.07 (t, *J* = 5.6 Hz, 1 H), 8.03 (t, *J* = 5.6 Hz, 1 H), 7.99 (t, *J* = 5.9 Hz, 2 H), 7.52 (s, 1 H), 7.43 (s, 1 H), 7.41 (s, 1 H), 7.18 (d, *J* = 1.2 Hz, 1 H), 7.14 (d, *J* = 1.2 Hz, 1 H), 7.12 (d, *J* = 1.8 Hz, 1 H), 7.05 (s, 1 H), 6.84 (d, *J* = 1.8 Hz, 1 H), 6.83 (d, *J* = 1.8 Hz, 1 H), 6.66 (d, *J* = 1.8 Hz, 1 H), 6.60 (br. s., 1 H), 3.98 (s, 3 H), 3.96 (s, 3 H), 3.90 (s, 3 H), 3.81 (s, 3 H), 3.79 (s, 3 H), 3.77 (s, 3 H), 3.53 - 3.47 (m, 2 H), 3.45 - 3.40 (m, 2 H), 3.40 - 3.32 (m, 2 H), 3.29 - 3.23 (m, 2 H), 3.12 - 3.04 (m, 2 H), 2.88 - 2.82 (m, 2 H), 2.76 - 2.67 (m, 2 H), 2.67 - 2.62 (m, 2 H), 2.60 (t, *J* = 6.7 Hz, 2 H), 2.50 - 2.47 (m, 2 H), 2.41 (br. s., 3 H), 2.32 (t, *J* = 7.0 Hz, 2 H), 2.26 (t, *J* = 7.3 Hz, 2 H), 1.83 - 1.74 (m, 4 H), 1.68 - 1.59 (m, 2 H)

<sup>13</sup>C NMR (151 MHz, DMSO-d<sub>6</sub>) δ = 170.7, 169.1, 168.5, 167.8, 163.1, 161.3, 161.2, 158.7, 158.4, 158.3, 155.9, 137.8, 135.8, 134.7, 134.1, 133.9, 127.6, 127.0, 122.8, 122.8, 122.7, 122.1, 122.0, 121.9, 118.1, 118.0, 117.7, 113.9, 113.6, 104.2, 103.9, 103.5, 53.9, 53.2, 40.3, 40.0, 38.1, 37.3, 37.0, 36.1, 36.0, 35.8, 35.6, 35.5, 35.5, 35.1, 35.1, 34.9, 34.9, 34.9, 33.2, 25.6, 25.4, 23.1

EA calc'd for C<sub>53</sub>H<sub>73</sub>N<sub>21</sub>O<sub>10</sub> (5 HCO<sub>2</sub>H)(6 H<sub>2</sub>O): C, 46.36%; H, 6.37%; N, 19.58%. Found: C, 46.47; H, 5.76%; N, 19.13%.

HRMS (ESI) calc'd for C<sub>53</sub>H<sub>73</sub>N<sub>21</sub>O<sub>10</sub> [M]<sup>+</sup>, 1163.5849, found, 1163.5825.

**KJK6021 (ImImPyImyPyPyPyPyβTa formate salt):**

<sup>1</sup>H NMR (600 MHz, DMSO-d<sub>6</sub>) δ = 10.31 (s, 1 H), 10.29 (s, 1 H), 9.96 (s, 1 H), 9.94 (s, 1 H), 9.93 (s, 1 H), 9.91 (s, 1 H), 8.41 (s, 2 H), 8.07 (t, *J* = 6.2 Hz, 1 H), 8.04 (t, *J* = 5.6 Hz, 1 H), 7.98 (t, *J* = 5.6 Hz, 1 H), 7.57 (s, 1 H), 7.50 (s, 1 H), 7.45 (s, 1 H), 7.39 (d, *J* = 1.8 Hz, 1 H), 7.23 (s, 2 H), 7.19 (d, *J* = 1.2 Hz, 1 H), 7.17 (d, *J* = 1.2 Hz, 1 H), 7.16 (d, *J* = 1.8 Hz, 1 H), 7.07 (s, 1 H), 7.06 (d, *J* = 1.2 Hz, 1 H), 7.05 (s, 1 H), 6.89 (s, 1 H), 6.85 (d, *J* = 1.2 Hz, 1 H), 4.01 (s, 3 H), 4.01 (s, 3 H), 3.94 (s, 3 H), 3.86 (s, 3 H), 3.85 (s, 3 H), 3.84 (s, 3 H), 3.83 (s, 3 H), 3.81 - 3.79 (m, 3 H), 3.40 - 3.33 (m, 2 H), 3.32 - 3.26 (m, 2 H), 3.06 (q, *J* = 6.5 Hz, 2 H), 2.78 (t, *J* = 6.7 Hz, 2 H), 2.37 - 2.21 (m, 8 H), 2.08 (s, 3 H), 1.81 (td, *J* = 7.1, 14.5 Hz, 2 H), 1.66 (td, *J* = 7.1, 14.5 Hz, 2 H), 1.52 (td, *J* = 7.0, 13.6 Hz, 2 H)

<sup>13</sup>C NMR (151 MHz, DMSO-d<sub>6</sub>) δ = 170.4, 169.1, 165.5, 161.2, 158.7, 158.7, 158.5, 158.5, 158.4, 155.7, 155.6, 137.8, 136.0, 134.7, 134.4, 134.1, 127.7, 127.1, 122.8, 122.7, 122.7, 122.2, 122.2, 122.2, 122.1, 122.0, 121.3, 119.5, 118.5, 118.4, 118.1, 117.9, 114.3, 114.0, 105.8, 104.7, 104.2, 104.0, 54.5, 54.4, 41.4, 40.0, 38.0, 37.7, 36.6, 36.2, 36.1, 36.1, 36.0, 35.5, 35.5, 35.2, 35.1, 34.9, 33.1, 26.7, 25.6, 24.9

EA calc'd for C<sub>59</sub>H<sub>75</sub>N<sub>23</sub>O<sub>10</sub> (5 HCO<sub>2</sub>H)(6 H<sub>2</sub>O): C, 47.91%; H, 6.09%; N, 20.08%. Found: C, 47.46%; H, 6.13%; N, 20.48%.

HRMS (ESI) calc'd for C<sub>59</sub>H<sub>75</sub>N<sub>23</sub>O<sub>10</sub> [M]<sup>+</sup>, 1265.6067, found, 1265.5994.

**KJK6053 (ImImPyImyPyPyPyPyβDp formate salt):**

<sup>1</sup>H NMR (600 MHz, DMSO-d<sub>6</sub>) δ = 10.30 (s, 1 H), 10.28 (s, 1 H), 9.95 (s, 1 H), 9.93 (s, 1 H), 9.91 (s, 1 H), 9.88 (s, 1 H), 8.33 (s, 2 H), 8.07 (t, *J* = 5.6 Hz, 1 H), 8.01 (t, *J* = 5.0 Hz, 1 H), 7.91 (t, *J* = 5.0 Hz, 1 H), 7.58 (s, 1 H), 7.50 (s, 1 H), 7.45 (s, 1 H), 7.39 (s, 1 H), 7.24 (s, 2 H), 7.20 (s, 1 H), 7.17 (s, 1 H), 7.15 (s, 1 H), 7.07 (s, 1 H), 7.06 (s, 1 H), 7.05 (s, 1 H), 6.89 (s, 1 H), 6.83 (s, 1 H), 4.02 (s, 3 H), 4.01 (s, 3 H), 3.94 (s, 3 H), 3.86 (s, 3 H), 3.85 (s, 3 H), 3.84 (s, 3 H), 3.83 (s, 3 H), 3.80 (s, 3 H), 3.36 (q, *J* = 6.0 Hz, 2 H), 3.29 (q, *J* = 6.5 Hz, 2 H), 3.06 (q, *J* = 6.5 Hz, 2 H), 2.83 - 2.75 (m, 2 H), 2.35 - 2.23 (m, 6 H), 2.15 (s, 3 H), 1.85 - 1.77 (m, 2 H), 1.70 - 1.62 (m, 2 H), 1.54 (td, *J* = 6.8, 13.9 Hz, 2 H), 1.23 (s, 2 H)

<sup>13</sup>C NMR (151 MHz, DMSO-d<sub>6</sub>) δ = 170.4, 169.1, 161.2, 158.7, 158.7, 158.5, 158.5, 158.4, 155.7, 155.6, 137.8, 136.0, 134.7, 134.4, 134.1, 127.7, 127.1, 122.8, 122.7, 122.7, 122.2, 122.2, 122.2, 122.1, 122.0, 121.3, 119.5, 118.5, 118.4, 118.2, 117.9, 114.3, 114.1, 105.8, 104.7, 104.7, 104.1, 104.0, 56.4, 44.8, 44.7, 40.0, 38.0, 36.7, 36.2, 36.1, 36.0, 35.5, 35.5, 35.2, 35.1, 34.9, 33.1, 26.8, 25.7

EA calc'd for C<sub>57</sub>H<sub>70</sub>N<sub>22</sub>O<sub>10</sub> (5 HCO<sub>2</sub>H)(3 H<sub>2</sub>O): C, 49.40%; H, 5.75%; N, 20.44%. Found: C, 49.47%; H, 5.82%; N, 19.63%.

**KJK6064 (ImImPyImγPyPyPyPyβTa TFA salt):**

<sup>1</sup>H NMR (600 MHz, DMSO-d<sub>6</sub>) δ = 10.28 (s, 1 H), 10.26 (s, 1 H), 9.93 (s, 1 H), 9.91 (s, 1 H), 9.89 (s, 1 H), 9.85 (s, 1 H), 9.82 (s, 1 H), 9.67 (br. s., 1 H), 8.10 (t, *J* = 5.9 Hz, 1 H), 8.08 - 8.02 (m, 2 H), 7.95 (br. s., 1 H), 7.89 (br. s., 3 H), 7.58 (s, 1 H), 7.50 (s, 1 H), 7.47 (s, 1 H), 7.39 (d, *J* = 1.8 Hz, 1 H), 7.23 (d, *J* = 1.2 Hz, 1 H), 7.22 (d, *J* = 1.8 Hz, 1 H), 7.17 (d, *J* = 1.8 Hz, 1 H), 7.16 (d, *J* = 1.2 Hz, 2 H), 7.10 (s, 1 H), 7.07 (s, 2 H), 6.90 - 6.87 (m, 2 H), 4.01 (s, 6 H), 3.94 (s, 3 H), 3.86 (s, 3 H), 3.85 (s, 3 H), 3.84 (s, 3 H), 3.83 (s, 3 H), 3.80 (s, 3 H), 3.42 - 3.35 (m, 2 H), 3.30 (q, *J* = 6.5 Hz, 2 H), 3.22 - 3.16 (m, 2 H), 3.16 - 3.10 (m, 2 H), 3.10 - 2.98 (m, 2 H), 2.91 - 2.83 (m, 2 H), 2.74 (d, *J* = 4.7 Hz, 3 H), 2.36 (t, *J* = 7.3 Hz, 2 H), 2.29 (t, *J* = 7.3 Hz, 2 H), 1.97 - 1.88 (m, 2 H), 1.86 - 1.74 (m, 4 H)

EA calc'd for C<sub>59</sub>H<sub>75</sub>N<sub>23</sub>O<sub>10</sub> (6 CF<sub>3</sub>CO<sub>2</sub>H)(6 H<sub>2</sub>O): C, 41.42%; H, 4.55%; N, 15.65%. Found: C, 42.22%; H, 4.20%; N, 14.82%.

**KA1071D (BOCPyβCO<sub>2</sub>H, Figure S7):**

<sup>1</sup>H NMR (600 MHz, DMSO-d<sub>6</sub>) δ = 12.17 (br. s., 1 H), 9.03 (s, 1 H), 7.97 (t, *J* = 5.3 Hz, 1 H), 6.82 (s, 1 H), 6.61 (s, 1 H), 3.75 (s, 3 H), 3.36 - 3.31 (m, 2 H), 2.45 (t, *J* = 7.3 Hz, 2 H), 1.44 (s, 9 H)

<sup>13</sup>C NMR (151 MHz, DMSO-d<sub>6</sub>) δ = 173.0, 161.2, 152.8, 122.8, 122.2, 116.4, 103.3, 78.2, 35.9, 34.8, 34.0, 28.2

HRMS (FAB) calc'd for C<sub>14</sub>H<sub>21</sub>N<sub>3</sub>O<sub>5</sub> [M + Na]<sup>+</sup>, 334.1379, found, 334.1380.

**KA1173B (BOCβPyCO<sub>2</sub>H, Figure S8) (for large scale prep, see below and Figure S9):**

<sup>1</sup>H NMR (600 MHz, DMSO-d<sub>6</sub>) δ = 12.16 (s, 1 H), 9.83 (s, 1 H), 7.28 (s, 1 H), 6.80 (s, 1 H), 6.65 (d, *J* = 1.8 Hz, 1 H), 3.79 (d, *J* = 1.0 Hz, 3 H), 3.20 - 3.14 (m, 2 H), 2.37 (t, *J* = 7.3 Hz, 2 H), 1.37 (s, 9 H)

<sup>13</sup>C NMR (151 MHz, DMSO-d<sub>6</sub>) δ = 167.6, 161.9, 155.5, 122.4, 119.9, 119.6, 107.7, 77.6, 36.7, 36.1, 36.0, 28.2

HRMS (FAB) calc'd for C<sub>14</sub>H<sub>21</sub>N<sub>3</sub>O<sub>5</sub> [M + Na]<sup>+</sup>, 334.1379, found, 334.1385.

Dimer syntheses and the use of dimers in polyamide synthesis (Table S3) are shown in the figures and text that follow.

**Table S3.** Illustration of dimer application in solid-phase syntheses.

|                 |                                                                    |
|-----------------|--------------------------------------------------------------------|
| KA1033/KJK6053  | (ImIm)-(PyIm)- $\gamma$ -(PyPy)-(PyPy)- $\beta$ -Pam               |
| KA1011          | (ImIm)-(PyIm)- $\gamma$ -(PyPy)-( $\beta$ Py)- $\beta$ -Pam        |
| KA1013          | (ImIm)-( $\beta$ Im)- $\gamma$ -(PyPy)-(PyPy)- $\beta$ -Pam        |
| KA2127          | (ImIm)-(PyIm)- $\gamma$ -(Py $\beta$ )-(PyPy)- $\beta$ -Pam        |
| KA2128          | (ImIm)-( $\beta$ Im)- $\gamma$ -(Py $\beta$ )-(PyPy)- $\beta$ -Pam |
| KA2129          | (ImIm)-( $\beta$ Im)- $\gamma$ -(PyPy)-( $\beta$ Py)- $\beta$ -Pam |
| KJK6021/KJK6064 | (ImIm)-(PyIm)- $\gamma$ -(PyPy)-(PyPy)- $\beta$ -Pam               |

\*Parentheses indicate how building blocks were employed, i.e. (PyPy) means that the pyrrole-pyrrole dimer was used.

|                            |                               |   |                                        |               |                      |
|----------------------------|-------------------------------|---|----------------------------------------|---------------|----------------------|
|                            | <b>BOCPyOBt</b>               | + | <b>H<sub>2</sub>NβCO<sub>2</sub>Et</b> | 10.0g/4.78g   | 20.0g/9.56g          |
|                            |                               |   | <b>DIEA</b>                            | 16.3ml        | 32.6ml               |
|                            |                               |   | <b>DMF</b>                             | KA1069 140ml  | KA1073 280ml         |
|                            |                               |   | <b>25 C, 16h</b>                       | 16h           | 17h                  |
|                            |                               |   | ↓                                      |               |                      |
| EtOAc<br>aqueous<br>workup | <b>BOCPyβCO<sub>2</sub>Et</b> |   |                                        | 9.35g (98.4%) | 18.4g (96.8%)        |
|                            |                               |   | <b>1. 1N NaOH</b>                      | 138ml         | 271ml                |
|                            |                               |   | <b>dioxane</b>                         | KA1071 138ml  | KA1075 271ml         |
|                            |                               |   | <b>40-45 C, 2h</b>                     | 2h            | 1.5h                 |
|                            |                               |   | <b>2. 1N HCl</b>                       | pH 4          | pH 4                 |
|                            |                               |   | ↓                                      |               |                      |
| EtOAc<br>aqueous<br>workup | <b>BOCPyβCO<sub>2</sub>H</b>  |   |                                        | 7.84g (92.6%) | 17.1g (quant. yield) |

**Figure S7.** Synthesis of BOC-Py-β-CO<sub>2</sub>H.

|                            |                                         |   |                                         |                     |                     |
|----------------------------|-----------------------------------------|---|-----------------------------------------|---------------------|---------------------|
|                            | <b>O<sub>2</sub>NPyCO<sub>2</sub>Me</b> |   |                                         | 20.0g               | 25.0g               |
|                            | <b>H<sub>2</sub> 40psi</b>              |   |                                         |                     |                     |
|                            | <b>10% Pd/C/50%H<sub>2</sub>O</b>       |   |                                         | 2.0g                | 2.5g                |
|                            | <b>MeOH</b>                             |   |                                         | KA1080 200ml        | KA1092 250ml        |
|                            | <b>25 C</b>                             |   |                                         | 2.5h                | 3h                  |
|                            |                                         |   | ↓                                       |                     |                     |
|                            | <b>BOCβAlaCO<sub>2</sub>H</b>           | + | <b>H<sub>2</sub>NPyCO<sub>2</sub>Me</b> | 19.3g/16.5g (98.2%) | 24.3g/20.8g (99.1%) |
|                            |                                         |   | <b>EDC-HCl</b>                          | 22.4g               | 20.8g               |
|                            |                                         |   | <b>DMAP, DIEA</b>                       | 1.24g, 53.3ml       | 1.57g, 67.2ml       |
|                            |                                         |   | <b>DMF</b>                              | KA1081 408ml        | KA1093 514ml        |
|                            |                                         |   | <b>25 C, 16h</b>                        | 19h                 | 21h                 |
|                            |                                         |   | ↓                                       |                     |                     |
| EtOAc<br>aqueous<br>workup | <b>BOCβPyCO<sub>2</sub>Me</b>           |   |                                         | 21.1 g (63.6%)      | 26.8 g (64.2%)      |
|                            |                                         |   | <b>1. 1N NaOH</b>                       | 324ml               | 412ml               |
|                            |                                         |   | <b>MeOH</b>                             | KA1083 324ml        | KA1083 412ml        |
|                            |                                         |   | <b>42-45 C, 2h</b>                      | 2h                  | 2h                  |
|                            |                                         |   | <b>2. 1N HCl</b>                        | pH 4                | pH 4                |
|                            |                                         |   | ↓                                       |                     |                     |
| filter solid               | <b>BOCβPyCO<sub>2</sub>H</b>            |   |                                         | 18.3g (90.8%)       | 24.6g (95.7%)       |

**Figure S8.** Synthesis of BOC-β-Py-CO<sub>2</sub>H.

### Large Scale Preparation of Boc- $\beta$ -Py-COOH (Figure S9)

The nitro pyrrole (**1**), was hydrogenated using a Parr shaker apparatus with ~20 psi hydrogen and Pd on carbon catalyst for about 1 hour. The reaction mixture was vacuum filtered through Celite to remove the Pd/C and conc'd by rotavap to give the crude amino monomer (**2**). This amine was used as is, but kept under nitrogen until further use.

BOC-beta-alanine (0.95 eq) was activated with carbonyl diimidazole (CDI) in DMF solution and couple to the amino-pyrrole ester (**2**) with imidazole-HCl catalysis. When the amino-pyrrole ester (**2**) was nearly consumed, the reaction mixture was added dropwise to excess aq. HCl to precipitate the intermediate (**3**). The precipitate was cooled in ice water and vacuum filtered, washing with water and dried under vacuum. The isolated intermediate (**8**) was saponified with aq. NaOH in dioxane. The sodium salt was neutralized by addition of aq. HCl to precipitate the desire product (**4**). The precipitated product was cooled in ice water and vacuum filtered, washing with water and dried under vacuum.

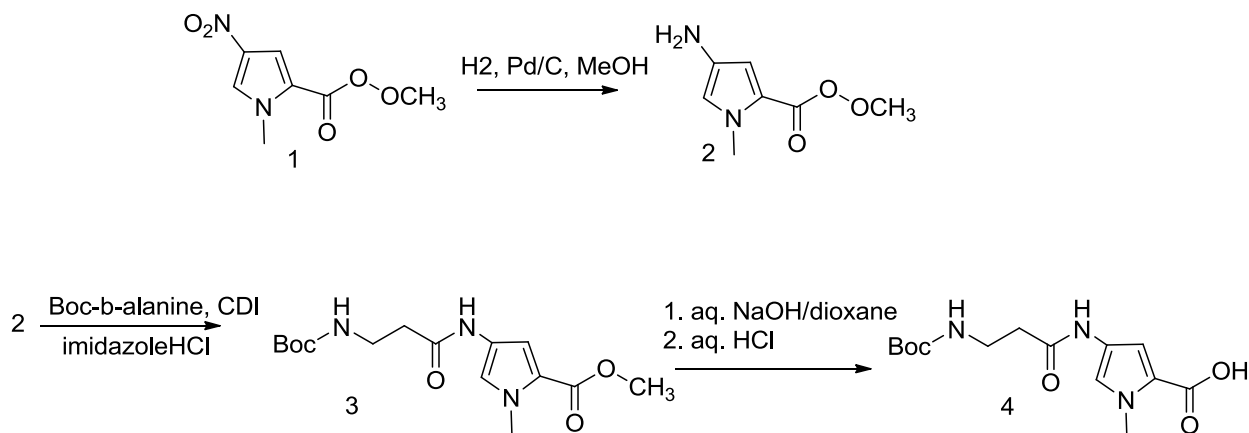

**Figure S9.** Large-scale Dimer Synthesis of Boc- $\beta$ -Py-COOH with carbonyldiimidazole (CDI).



### Section 3. Crystallography

#### **X-ray Structure Determination of Compounds Boc- $\beta$ -Py-COOH as its 0.5 dioxane and 1.0 MeOH solvates and Boc-Py- $\beta$ -COOH as its 0.5 dioxane solvate.**

Crystals of appropriate dimensions were mounted on MiTeGen cryoloops in random orientations. Preliminary examination and data collection were performed using a Bruker X8 Kappa Apex II Charge Coupled Device (CCD) Detector system single crystal X-Ray diffractometer equipped with an Oxford Cryostream LT device. All data were collected using graphite monochromated Mo K $\alpha$  radiation ( $\lambda = 0.71073 \text{ \AA}$ ) from a fine focus sealed tube X-Ray source. Preliminary unit cell constants were determined with a set of 36 narrow frame scans. Typical data sets consist of combinations of  $\omega$  and  $\phi$  scan frames with typical scan width of  $0.5^\circ$  and counting time of 10-15 seconds/frame at a crystal to detector distance of 4.0 cm. The collected frames were integrated using an orientation matrix determined from the narrow frame scans. Apex II and SAINT software packages (*Bruker Analytical X-Ray, Madison, WI, 2010*) were used for data collection and data integration. Analysis of the integrated data did not show any decay. Final cell constants were determined by global refinement of reflections harvested from the complete data set. Collected data were corrected for systematic errors using SADABS (*Bruker Analytical X-Ray, Madison, WI, 2010*) based on the Laue symmetry using equivalent reflections.

Crystal data and intensity data collection parameters are listed in Xray Tables 1 and 7. Structure solution and refinement were carried out using the SHELXTL- PLUS software package (*Sheldrick, G.M. (2008). Acta Cryst. A64,112-122*). The structures was solved by direct methods and refined successfully in the space groups  $P\bar{1}$ ,  $P2_1/c$  and  $P2_1/n$  respectively for Compounds Boc- $\beta$ -Py-COOH as its 0.5 dioxane and 1.0 MeOH solvates and Boc-Py- $\beta$ -COOH as its 0.5 dioxane solvate. Full matrix least-squares refinements were carried out by minimizing  $\sum w(F_o^2 - F_c^2)^2$ . The non-hydrogen atoms were refined anisotropically to convergence. The N-H and O-H hydrogens were located and refined bond distance restraints. Other hydrogen atoms were treated using appropriate riding model (AFIX m3). The final residual values and structure refinement parameters are listed in X-ray Tables 1, 7 and 13.

Complete listings of positional and isotropic displacement coefficients for hydrogen atoms, anisotropic displacement coefficients for the non-hydrogen atoms are listed as supplementary material (X-ray Tables 2-6, 8-12 and 13-17). Table of calculated and observed structure factors are available in electronic format. Structure data for all the X-ray structures can be obtained from the Cambridge Crystallographic Data Center, CCDC #993654 Boc- $\beta$ -Py acid 0.5 dioxane solvate, CCDC #993655 Boc- $\beta$ -Py acid 1.0 methanol solvate and CCDC #993894 Boc-Py- $\beta$  acid 0.5 dioxane solvate. Tables of crystal data, atomic coordinates, bond lengths and bond angles, along with thermal ellipsoid and hydrogen bonding Figures follow.

**X-ray Table 1.** Crystal data and structure refinement for Boc- $\beta$ -Py-COOH (0.5 dioxane solvate).

|                                   |                                                               |                       |
|-----------------------------------|---------------------------------------------------------------|-----------------------|
| Identification code               | Boc- $\beta$ -Py-COOH/bas1612                                 |                       |
| Empirical formula                 | C <sub>16</sub> H <sub>25</sub> N <sub>3</sub> O <sub>6</sub> |                       |
| Formula weight                    | 355.39                                                        |                       |
| Temperature                       | 100(2) K                                                      |                       |
| Wavelength                        | 0.71073 Å                                                     |                       |
| Crystal system                    | Triclinic                                                     |                       |
| Space group                       | P $\bar{1}$                                                   |                       |
| Unit cell dimensions              | a = 5.6994(4) Å                                               | $\alpha$ = 73.506(3)° |
|                                   | b = 12.1727(8) Å                                              | $\beta$ = 88.323(4)°  |
|                                   | c = 13.5102(9) Å                                              | $\gamma$ = 89.037(4)° |
| Volume                            | 898.31(11) Å <sup>3</sup>                                     |                       |
| Z                                 | 2                                                             |                       |
| Density (calculated)              | 1.314 Mg/m <sup>3</sup>                                       |                       |
| Absorption coefficient            | 0.101 mm <sup>-1</sup>                                        |                       |
| F(000)                            | 380                                                           |                       |
| Crystal size                      | 0.41 x 0.30 x 0.30 mm <sup>3</sup>                            |                       |
| Theta range for data collection   | 1.74 to 31.18°                                                |                       |
| Index ranges                      | -8 ≤ h ≤ 8, -17 ≤ k ≤ 17, -19 ≤ l ≤ 19                        |                       |
| Reflections collected             | 31016                                                         |                       |
| Independent reflections           | 5776 [R(int) = 0.0297]                                        |                       |
| Completeness to theta = 31.18°    | 99.3 %                                                        |                       |
| Absorption correction             | Semi-empirical from equivalents                               |                       |
| Max. and min. transmission        | 0.9708 and 0.9601                                             |                       |
| Refinement method                 | Full-matrix least-squares on F <sup>2</sup>                   |                       |
| Data / restraints / parameters    | 5776 / 3 / 242                                                |                       |
| Goodness-of-fit on F <sup>2</sup> | 1.021                                                         |                       |
| Final R indices [I > 2σ(I)]       | R1 = 0.0383, wR2 = 0.0957                                     |                       |
| R indices (all data)              | R1 = 0.0511, wR2 = 0.1043                                     |                       |
| Largest diff. peak and hole       | 0.390 and -0.228 e.Å <sup>-3</sup>                            |                       |

**X-ray Table 2.** Atomic coordinates ( $\times 10^4$ ) and equivalent isotropic displacement parameters ( $\text{\AA}^2 \times 10^3$ ) for Boc- $\beta$ -Py-COOH (0.5 dioxane solvate).  $U(\text{eq})$  is defined as one third of the trace of the orthogonalized  $U^{ij}$  tensor.

|        | x        | y       | z        | $U(\text{eq})$ |
|--------|----------|---------|----------|----------------|
| O(8)   | 13346(1) | 1166(1) | 4632(1)  | 22(1)          |
| O(9)   | 12956(1) | -503(1) | 4252(1)  | 22(1)          |
| O(5')  | 3438(1)  | 2380(1) | 1472(1)  | 24(1)          |
| O(1'') | 2867(1)  | 1444(1) | -1753(1) | 20(1)          |
| O(2'') | 3954(1)  | 3319(1) | -2173(1) | 23(1)          |
| N(1)   | 9224(1)  | 1991(1) | 3428(1)  | 19(1)          |
| N(4)   | 1976(2)  | 2571(1) | -715(1)  | 19(1)          |
| N(10)  | 5663(1)  | 760(1)  | 1879(1)  | 19(1)          |
| C(2)   | 10258(2) | 930(1)  | 3582(1)  | 18(1)          |
| C(3)   | 9039(2)  | 335(1)  | 3034(1)  | 17(1)          |
| C(4)   | 7242(2)  | 1061(1) | 2529(1)  | 17(1)          |
| C(5)   | 7384(2)  | 2080(1) | 2788(1)  | 19(1)          |
| C(6)   | 9879(2)  | 2888(1) | 3878(1)  | 29(1)          |
| C(7)   | 12308(2) | 558(1)  | 4201(1)  | 18(1)          |
| C(1')  | 3865(2)  | 1417(1) | 1401(1)  | 18(1)          |
| C(2')  | 2400(2)  | 844(1)  | 770(1)   | 19(1)          |
| C(3')  | 754(2)   | 1682(1) | 64(1)    | 19(1)          |
| C(2'') | 2942(2)  | 2363(1) | -1559(1) | 17(1)          |
| C(4'') | 5407(2)  | 3280(1) | -3074(1) | 20(1)          |
| C(5'') | 7425(2)  | 2439(1) | -2748(1) | 32(1)          |
| C(6'') | 3934(2)  | 3004(1) | -3885(1) | 27(1)          |
| C(7'') | 6307(2)  | 4496(1) | -3452(1) | 34(1)          |
| O(1S)  | 2127(1)  | 4850(1) | -508(1)  | 22(1)          |
| C(1S)  | 2114(2)  | 5104(1) | 464(1)   | 23(1)          |
| C(2S)  | 100(2)   | 5333(1) | -1072(1) | 23(1)          |

**X-ray Table 3.** Bond lengths [Å] and angles [°] for Boc-β-Py-COOH (0.5 dioxane solvate).

---

|               |            |
|---------------|------------|
| O(8)-C(7)     | 1.2315(11) |
| O(9)-C(7)     | 1.3198(12) |
| O(9)-H(9)     | 0.841(2)   |
| O(5')-C(1')   | 1.2223(11) |
| O(1'')-C(2'') | 1.2210(11) |
| O(2'')-C(2'') | 1.3486(11) |
| O(2'')-C(4'') | 1.4637(12) |
| N(1)-C(5)     | 1.3616(12) |
| N(1)-C(2)     | 1.3734(12) |
| N(1)-C(6)     | 1.4510(12) |
| N(4')-C(2'')  | 1.3376(12) |
| N(4')-C(3')   | 1.4485(13) |
| N(4')-H(4')   | 0.880(2)   |
| N(10)-C(1')   | 1.3510(12) |
| N(10)-C(4)    | 1.3983(11) |
| N(10)-H(10)   | 0.879(2)   |
| C(2)-C(3)     | 1.3815(12) |
| C(2)-C(7)     | 1.4470(13) |
| C(3)-C(4)     | 1.4011(13) |
| C(3)-H(3)     | 0.9500     |
| C(4)-C(5)     | 1.3855(13) |
| C(5)-H(5)     | 0.9500     |
| C(6)-H(6A)    | 0.9800     |
| C(6)-H(6B)    | 0.9800     |
| C(6)-H(6C)    | 0.9800     |
| C(1')-C(2')   | 1.5193(12) |
| C(2')-C(3')   | 1.5162(13) |
| C(2')-H(2'A)  | 0.9900     |
| C(2')-H(2'B)  | 0.9900     |
| C(3')-H(3'A)  | 0.9900     |
| C(3')-H(3'B)  | 0.9900     |
| C(4'')-C(6'') | 1.5141(13) |
| C(4'')-C(7'') | 1.5154(15) |
| C(4'')-C(5'') | 1.5157(15) |
| C(5'')-H(5'1) | 0.9800     |
| C(5'')-H(5'2) | 0.9800     |
| C(5'')-H(5'3) | 0.9800     |
| C(6'')-H(6'1) | 0.9800     |
| C(6'')-H(6'2) | 0.9800     |
| C(6'')-H(6'3) | 0.9800     |
| C(7'')-H(7'1) | 0.9800     |
| C(7'')-H(7'2) | 0.9800     |
| C(7'')-H(7'3) | 0.9800     |
| O(1S)-C(2S)   | 1.4268(12) |
| O(1S)-C(1S)   | 1.4316(12) |
| C(1S)-C(2S)#1 | 1.5043(15) |
| C(1S)-H(1S1)  | 0.9900     |
| C(1S)-H(1S2)  | 0.9900     |
| C(2S)-C(1S)#1 | 1.5043(15) |

|                      |           |
|----------------------|-----------|
| C(2S)-H(2S1)         | 0.9900    |
| C(2S)-H(2S2)         | 0.9900    |
| C(7)-O(9)-H(9)       | 110.5(12) |
| C(2'')-O(2'')-C(4'') | 120.95(7) |
| C(5)-N(1)-C(2)       | 109.12(8) |
| C(5)-N(1)-C(6)       | 123.63(9) |
| C(2)-N(1)-C(6)       | 127.24(8) |
| C(2'')-N(4')-C(3')   | 121.15(8) |
| C(2'')-N(4')-H(4')   | 118.1(9)  |
| C(3')-N(4')-H(4')    | 120.4(9)  |
| C(1')-N(10)-C(4)     | 125.67(8) |
| C(1')-N(10)-H(10)    | 119.0(8)  |
| C(4)-N(10)-H(10)     | 115.2(8)  |
| N(1)-C(2)-C(3)       | 108.14(8) |
| N(1)-C(2)-C(7)       | 123.84(8) |
| C(3)-C(2)-C(7)       | 128.00(9) |
| C(2)-C(3)-C(4)       | 107.11(8) |
| C(2)-C(3)-H(3)       | 126.4     |
| C(4)-C(3)-H(3)       | 126.4     |
| C(5)-C(4)-N(10)      | 128.70(9) |
| C(5)-C(4)-C(3)       | 107.67(8) |
| N(10)-C(4)-C(3)      | 123.62(8) |
| N(1)-C(5)-C(4)       | 107.95(8) |
| N(1)-C(5)-H(5)       | 126.0     |
| C(4)-C(5)-H(5)       | 126.0     |
| N(1)-C(6)-H(6A)      | 109.5     |
| N(1)-C(6)-H(6B)      | 109.5     |
| H(6A)-C(6)-H(6B)     | 109.5     |
| N(1)-C(6)-H(6C)      | 109.5     |
| H(6A)-C(6)-H(6C)     | 109.5     |
| H(6B)-C(6)-H(6C)     | 109.5     |
| O(8)-C(7)-O(9)       | 123.48(9) |
| O(8)-C(7)-C(2)       | 123.66(9) |
| O(9)-C(7)-C(2)       | 112.87(8) |
| O(5')-C(1')-N(10)    | 123.43(8) |
| O(5')-C(1')-C(2')    | 122.88(8) |
| N(10)-C(1')-C(2')    | 113.69(8) |
| C(3')-C(2')-C(1')    | 112.20(8) |
| C(3')-C(2')-H(2'A)   | 109.2     |
| C(1')-C(2')-H(2'A)   | 109.2     |
| C(3')-C(2')-H(2'B)   | 109.2     |
| C(1')-C(2')-H(2'B)   | 109.2     |
| H(2'A)-C(2')-H(2'B)  | 107.9     |
| N(4')-C(3')-C(2')    | 113.10(8) |
| N(4')-C(3')-H(3'A)   | 109.0     |
| C(2')-C(3')-H(3'A)   | 109.0     |
| N(4')-C(3')-H(3'B)   | 109.0     |
| C(2')-C(3')-H(3'B)   | 109.0     |
| H(3'A)-C(3')-H(3'B)  | 107.8     |
| O(1'')-C(2'')-N(4'') | 124.53(9) |

|                      |           |
|----------------------|-----------|
| O(1'')-C(2'')-O(2'') | 125.10(8) |
| N(4')-C(2'')-O(2'')  | 110.35(8) |
| O(2'')-C(4'')-C(6'') | 110.75(8) |
| O(2'')-C(4'')-C(7'') | 102.01(8) |
| C(6'')-C(4'')-C(7'') | 110.57(9) |
| O(2'')-C(4'')-C(5'') | 110.29(8) |
| C(6'')-C(4'')-C(5'') | 112.20(9) |
| C(7'')-C(4'')-C(5'') | 110.57(9) |
| C(4'')-C(5'')-H(5'1) | 109.5     |
| C(4'')-C(5'')-H(5'2) | 109.5     |
| H(5'1)-C(5'')-H(5'2) | 109.5     |
| C(4'')-C(5'')-H(5'3) | 109.5     |
| H(5'1)-C(5'')-H(5'3) | 109.5     |
| H(5'2)-C(5'')-H(5'3) | 109.5     |
| C(4'')-C(6'')-H(6'1) | 109.5     |
| C(4'')-C(6'')-H(6'2) | 109.5     |
| H(6'1)-C(6'')-H(6'2) | 109.5     |
| C(4'')-C(6'')-H(6'3) | 109.5     |
| H(6'1)-C(6'')-H(6'3) | 109.5     |
| H(6'2)-C(6'')-H(6'3) | 109.5     |
| C(4'')-C(7'')-H(7'1) | 109.5     |
| C(4'')-C(7'')-H(7'2) | 109.5     |
| H(7'1)-C(7'')-H(7'2) | 109.5     |
| C(4'')-C(7'')-H(7'3) | 109.5     |
| H(7'1)-C(7'')-H(7'3) | 109.5     |
| H(7'2)-C(7'')-H(7'3) | 109.5     |
| C(2S)-O(1S)-C(1S)    | 110.26(7) |
| O(1S)-C(1S)-C(2S)#1  | 110.13(8) |
| O(1S)-C(1S)-H(1S1)   | 109.6     |
| C(2S)#1-C(1S)-H(1S1) | 109.6     |
| O(1S)-C(1S)-H(1S2)   | 109.6     |
| C(2S)#1-C(1S)-H(1S2) | 109.6     |
| H(1S1)-C(1S)-H(1S2)  | 108.1     |
| O(1S)-C(2S)-C(1S)#1  | 111.02(8) |
| O(1S)-C(2S)-H(2S1)   | 109.4     |
| C(1S)#1-C(2S)-H(2S1) | 109.4     |
| O(1S)-C(2S)-H(2S2)   | 109.4     |
| C(1S)#1-C(2S)-H(2S2) | 109.4     |
| H(2S1)-C(2S)-H(2S2)  | 108.0     |

---

Symmetry transformations used to generate equivalent atoms: #1 -x,-y+1,-z

**X-ray Table 4.** Anisotropic displacement parameters ( $\text{\AA}^2 \times 10^3$ ) for Boc- $\beta$ -Py-COOH (0.5 dioxane solvate). The anisotropic displacement factor exponent takes the form:  $-2\pi^2 [ h^2 a^{*2} U^{11} + \dots + 2 h k a^* b^* U^{12} ]$

|        | $U^{11}$ | $U^{22}$ | $U^{33}$ | $U^{23}$ | $U^{13}$ | $U^{12}$ |
|--------|----------|----------|----------|----------|----------|----------|
| O(8)   | 24(1)    | 22(1)    | 22(1)    | -7(1)    | -4(1)    | -2(1)    |
| O(9)   | 23(1)    | 21(1)    | 24(1)    | -8(1)    | -6(1)    | 2(1)     |
| O(5')  | 30(1)    | 18(1)    | 27(1)    | -9(1)    | -8(1)    | 5(1)     |
| O(1'') | 25(1)    | 15(1)    | 22(1)    | -7(1)    | -1(1)    | 1(1)     |
| O(2'') | 32(1)    | 15(1)    | 20(1)    | -5(1)    | 3(1)     | -2(1)    |
| N(1)   | 22(1)    | 17(1)    | 19(1)    | -7(1)    | -1(1)    | -1(1)    |
| N(4')  | 26(1)    | 15(1)    | 17(1)    | -6(1)    | -1(1)    | 1(1)     |
| N(10)  | 20(1)    | 15(1)    | 22(1)    | -7(1)    | -4(1)    | 2(1)     |
| C(2)   | 19(1)    | 18(1)    | 16(1)    | -5(1)    | 0(1)     | -1(1)    |
| C(3)   | 19(1)    | 17(1)    | 17(1)    | -5(1)    | 0(1)     | 0(1)     |
| C(4)   | 18(1)    | 17(1)    | 17(1)    | -5(1)    | 0(1)     | -1(1)    |
| C(5)   | 20(1)    | 18(1)    | 20(1)    | -6(1)    | -1(1)    | 1(1)     |
| C(6)   | 35(1)    | 21(1)    | 37(1)    | -15(1)   | -11(1)   | 2(1)     |
| C(7)   | 19(1)    | 20(1)    | 14(1)    | -4(1)    | 1(1)     | -1(1)    |
| C(1')  | 20(1)    | 17(1)    | 16(1)    | -4(1)    | 0(1)     | 1(1)     |
| C(2')  | 21(1)    | 17(1)    | 18(1)    | -5(1)    | -2(1)    | 1(1)     |
| C(3')  | 19(1)    | 20(1)    | 18(1)    | -5(1)    | -1(1)    | 1(1)     |
| C(2'') | 18(1)    | 15(1)    | 17(1)    | -4(1)    | -4(1)    | 2(1)     |
| C(4'') | 21(1)    | 20(1)    | 18(1)    | -4(1)    | -1(1)    | -2(1)    |
| C(5'') | 20(1)    | 36(1)    | 33(1)    | -1(1)    | -1(1)    | 3(1)     |
| C(6'') | 28(1)    | 34(1)    | 19(1)    | -6(1)    | -3(1)    | -5(1)    |
| C(7'') | 43(1)    | 26(1)    | 30(1)    | -2(1)    | 3(1)     | -12(1)   |
| O(1S)  | 18(1)    | 22(1)    | 27(1)    | -10(1)   | 0(1)     | 2(1)     |
| C(1S)  | 19(1)    | 26(1)    | 28(1)    | -13(1)   | -4(1)    | 2(1)     |
| C(2S)  | 25(1)    | 23(1)    | 22(1)    | -7(1)    | -2(1)    | 4(1)     |



**X-ray Table 5.** Hydrogen coordinates ( $\times 10^4$ ) and isotropic displacement parameters ( $\text{\AA}^2 \times 10^{-3}$ ) for Boc- $\beta$ -Py-COOH (0.5 dioxane solvate).

|        | x         | y        | z        | U(eq) |
|--------|-----------|----------|----------|-------|
| H(3)   | 9359      | -424     | 3004     | 21    |
| H(5)   | 6375      | 2726     | 2560     | 23    |
| H(6A)  | 11482     | 3136     | 3652     | 44    |
| H(6B)  | 9800      | 2594     | 4633     | 44    |
| H(6C)  | 8796      | 3540     | 3653     | 44    |
| H(2'A) | 3457      | 492      | 349      | 22    |
| H(2'B) | 1468      | 225      | 1244     | 22    |
| H(3'A) | -253      | 1257     | -282     | 23    |
| H(3'B) | -280      | 2044     | 485      | 23    |
| H(5'1) | 8559      | 2536     | -3326    | 47    |
| H(5'2) | 6824      | 1655     | -2550    | 47    |
| H(5'3) | 8198      | 2583     | -2159    | 47    |
| H(6'1) | 4897      | 3072     | -4513    | 41    |
| H(6'2) | 2606      | 3542     | -4045    | 41    |
| H(6'3) | 3346      | 2220     | -3624    | 41    |
| H(7'1) | 7207      | 4669     | -2908    | 51    |
| H(7'2) | 4976      | 5030     | -3626    | 51    |
| H(7'3) | 7319      | 4576     | -4067    | 51    |
| H(1S1) | 2217      | 5943     | 346      | 28    |
| H(1S2) | 3495      | 4740     | 860      | 28    |
| H(2S1) | 110       | 5134     | -1733    | 28    |
| H(2S2) | 142       | 6178     | -1231    | 28    |
| H(9)   | 14175(17) | -685(14) | 4599(11) | 52(5) |
| H(10)  | 5860(20)  | 69(5)    | 1806(10) | 25(3) |
| H(4')  | 2250(20)  | 3236(6)  | -607(11) | 32(4) |

**X-ray Table 6.** Torsion angles [°] for Boc- $\beta$ -Py-COOH (0.5 dioxane solvate).

---

|                             |            |
|-----------------------------|------------|
| C(5)-N(1)-C(2)-C(3)         | -0.31(11)  |
| C(6)-N(1)-C(2)-C(3)         | 178.10(9)  |
| C(5)-N(1)-C(2)-C(7)         | 178.25(9)  |
| C(6)-N(1)-C(2)-C(7)         | -3.34(15)  |
| N(1)-C(2)-C(3)-C(4)         | 0.57(10)   |
| C(7)-C(2)-C(3)-C(4)         | -177.91(9) |
| C(1')-N(10)-C(4)-C(5)       | -2.87(16)  |
| C(1')-N(10)-C(4)-C(3)       | 177.98(9)  |
| C(2)-C(3)-C(4)-C(5)         | -0.62(11)  |
| C(2)-C(3)-C(4)-N(10)        | 178.68(8)  |
| C(2)-N(1)-C(5)-C(4)         | -0.08(11)  |
| C(6)-N(1)-C(5)-C(4)         | -178.56(9) |
| N(10)-C(4)-C(5)-N(1)        | -178.82(9) |
| C(3)-C(4)-C(5)-N(1)         | 0.44(11)   |
| N(1)-C(2)-C(7)-O(8)         | -1.41(15)  |
| C(3)-C(2)-C(7)-O(8)         | 176.85(9)  |
| N(1)-C(2)-C(7)-O(9)         | 178.85(8)  |
| C(3)-C(2)-C(7)-O(9)         | -2.88(14)  |
| C(4)-N(10)-C(1')-O(5')      | 1.36(16)   |
| C(4)-N(10)-C(1')-C(2')      | -178.12(8) |
| O(5')-C(1')-C(2')-C(3')     | 13.06(13)  |
| N(10)-C(1')-C(2')-C(3')     | -167.46(8) |
| C(2'')-N(4')-C(3')-C(2')    | 78.06(10)  |
| C(1')-C(2')-C(3')-N(4')     | 63.60(10)  |
| C(3')-N(4')-C(2'')-O(1'')   | 0.92(14)   |
| C(3')-N(4')-C(2'')-O(2'')   | 179.35(8)  |
| C(4'')-O(2'')-C(2'')-O(1'') | -10.00(14) |
| C(4'')-O(2'')-C(2'')-N(4')  | 171.58(8)  |
| C(2'')-O(2'')-C(4'')-C(6'') | 67.07(11)  |
| C(2'')-O(2'')-C(4'')-C(7'') | -175.23(8) |
| C(2'')-O(2'')-C(4'')-C(5'') | -57.74(11) |
| C(2S)-O(1S)-C(1S)-C(2S)#1   | 57.14(11)  |
| C(1S)-O(1S)-C(2S)-C(1S)#1   | -57.67(11) |

---

Symmetry transformations used to generate equivalent atoms: #1 -x,-y+1,-z

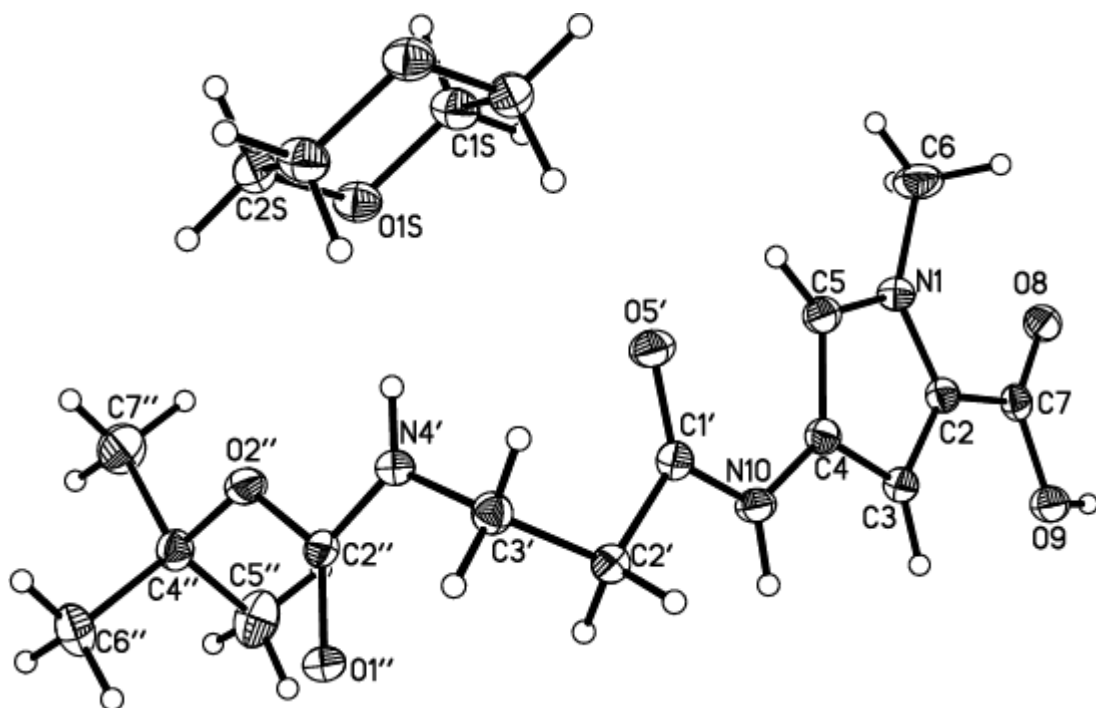

**X-ray Figure 1.** Projection view with 50% thermal ellipsoids of Boc- $\beta$ -Py-COOH (0.5 dioxane solvate).

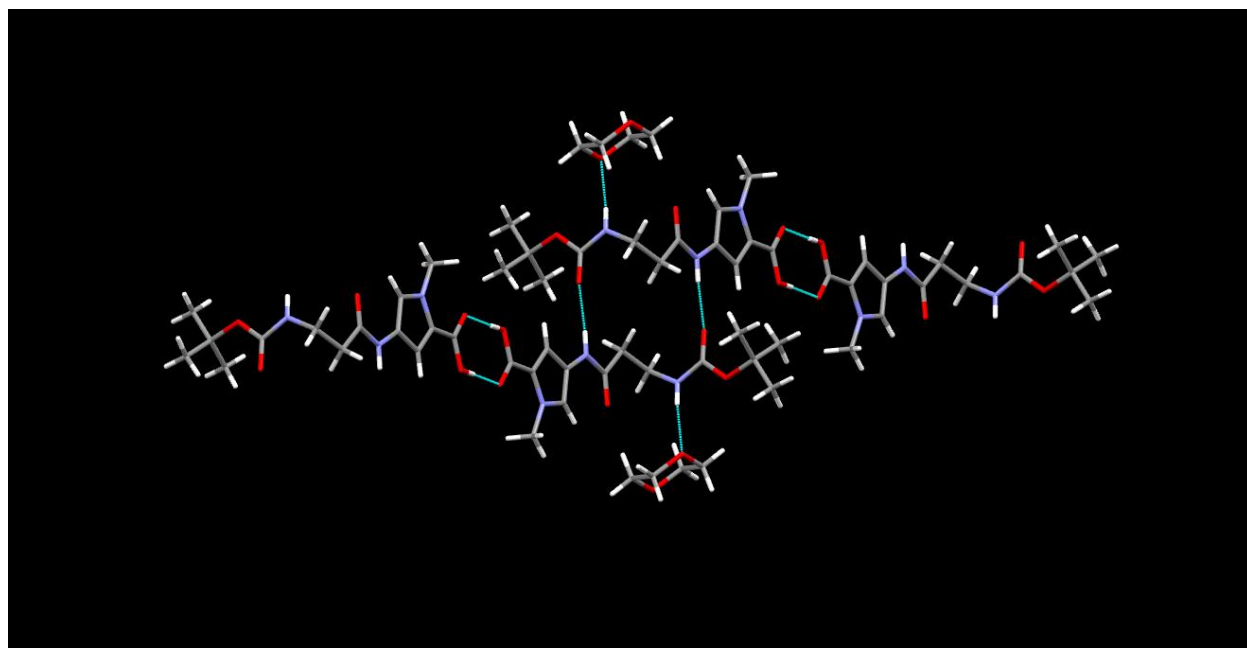

**X-ray Figure 2.** Hydrogen bonding between molecules in the crystal structure of Boc- $\beta$ -Py-COOH (0.5 dioxane solvate).

**X-ray Table 7.** Crystal data and structure refinement for Boc- $\beta$ -Py-COOH (methanol solvate).

|                                   |                                                               |                             |
|-----------------------------------|---------------------------------------------------------------|-----------------------------|
| Identification code               | Boc-Py- $\beta$ -COOH/ bas1812                                |                             |
| Empirical formula                 | C <sub>15</sub> H <sub>25</sub> N <sub>3</sub> O <sub>6</sub> |                             |
| Formula weight                    | 343.38                                                        |                             |
| Temperature                       | 100(2) K                                                      |                             |
| Wavelength                        | 0.71073 Å                                                     |                             |
| Crystal system                    | Monoclinic                                                    |                             |
| Space group                       | P2 <sub>1</sub> /c                                            |                             |
| Unit cell dimensions              | a = 8.6327(4) Å                                               | $\alpha = 90^\circ$ .       |
|                                   | b = 8.4467(4) Å                                               | $\beta = 95.597(3)^\circ$ . |
|                                   | c = 24.0094(12) Å                                             | $\gamma = 90^\circ$ .       |
| Volume                            | 1742.37(14) Å <sup>3</sup>                                    |                             |
| Z                                 | 4                                                             |                             |
| Density (calculated)              | 1.309 Mg/m <sup>3</sup>                                       |                             |
| Absorption coefficient            | 0.101 mm <sup>-1</sup>                                        |                             |
| F(000)                            | 736                                                           |                             |
| Crystal size                      | 0.38 x 0.34 x 0.30 mm <sup>3</sup>                            |                             |
| Theta range for data collection   | 1.70 to 30.64°.                                               |                             |
| Index ranges                      | -12 ≤ h ≤ 12, -12 ≤ k ≤ 12, -34 ≤ l ≤ 34                      |                             |
| Reflections collected             | 56397                                                         |                             |
| Independent reflections           | 5366 [R(int) = 0.0401]                                        |                             |
| Completeness to theta = 30.64°    | 99.6 %                                                        |                             |
| Absorption correction             | Semi-empirical from equivalents                               |                             |
| Max. and min. transmission        | 0.9704 and 0.9629                                             |                             |
| Refinement method                 | Full-matrix least-squares on F <sup>2</sup>                   |                             |
| Data / restraints / parameters    | 5366 / 4 / 238                                                |                             |
| Goodness-of-fit on F <sup>2</sup> | 1.021                                                         |                             |
| Final R indices [I > 2σ(I)]       | R1 = 0.0423, wR2 = 0.1087                                     |                             |
| R indices (all data)              | R1 = 0.0550, wR2 = 0.1168                                     |                             |
| Largest diff. peak and hole       | 0.511 and -0.278 e.Å <sup>-3</sup>                            |                             |

**X-ray Table 8.** Atomic coordinates ( $\times 10^4$ ) and equivalent isotropic displacement parameters ( $\text{\AA}^2 \times 10^3$ ) for Boc- $\beta$ -Py-COOH (methanol solvate). U(eq) is defined as one third of the trace of the orthogonalized  $U^{ij}$  tensor.

|        | x        | y        | z       | U(eq) |
|--------|----------|----------|---------|-------|
| O(8)   | 6294(1)  | 13588(1) | 5169(1) | 19(1) |
| O(9)   | 4329(1)  | 13573(1) | 4483(1) | 20(1) |
| O(5')  | 6921(1)  | 5908(1)  | 4081(1) | 21(1) |
| O(1'') | 6917(1)  | 4074(1)  | 2111(1) | 23(1) |
| O(2'') | 9418(1)  | 4161(1)  | 2515(1) | 19(1) |
| N(1)   | 7099(1)  | 10440(1) | 4803(1) | 15(1) |
| N(10)  | 5394(1)  | 7890(1)  | 3714(1) | 16(1) |
| N(4')  | 7514(1)  | 3922(1)  | 3051(1) | 19(1) |
| C(2)   | 5903(1)  | 11367(1) | 4568(1) | 15(1) |
| C(3)   | 5122(1)  | 10530(1) | 4132(1) | 15(1) |
| C(4)   | 5865(1)  | 9061(1)  | 4106(1) | 14(1) |
| C(5)   | 7089(1)  | 9036(1)  | 4525(1) | 16(1) |
| C(6)   | 8225(1)  | 10848(1) | 5272(1) | 20(1) |
| C(7)   | 5550(1)  | 12929(1) | 4772(1) | 16(1) |
| C(1)   | 5916(1)  | 6388(1)  | 3722(1) | 16(1) |
| C(2)   | 5138(1)  | 5362(1)  | 3259(1) | 20(1) |
| C(3')  | 5931(1)  | 3778(1)  | 3196(1) | 19(1) |
| C(2'') | 7867(1)  | 4050(1)  | 2523(1) | 17(1) |
| C(4'') | 10146(1) | 4274(2)  | 1986(1) | 21(1) |
| C(5'') | 9586(2)  | 5736(1)  | 1664(1) | 24(1) |
| C(6'') | 9851(2)  | 2756(2)  | 1653(1) | 27(1) |
| C(7'') | 11855(2) | 4440(2)  | 2197(1) | 33(1) |
| C(1S)  | 10631(2) | 4119(2)  | 4320(1) | 38(1) |
| O(1S)  | 9121(1)  | 3537(1)  | 4186(1) | 27(1) |

**X-ray Table 9.** Bond lengths [ $\text{\AA}$ ] and angles [ $^\circ$ ] for Boc- $\beta$ -Py-COOH (methanol solvate).

---

|               |            |
|---------------|------------|
| O(8)-C(7)     | 1.2284(13) |
| O(9)-C(7)     | 1.3209(13) |
| O(9)-H(9)     | 0.841(2)   |
| O(5')-C(1')   | 1.2305(13) |
| O(1'')-C(2'') | 1.2217(13) |
| O(2'')-C(2'') | 1.3440(13) |
| O(2'')-C(4'') | 1.4731(13) |
| N(1)-C(5)     | 1.3604(14) |
| N(1)-C(2)     | 1.3719(13) |
| N(1)-C(6)     | 1.4551(13) |
| N(10)-C(1')   | 1.3453(14) |
| N(10)-C(4)    | 1.3990(13) |
| N(10)-H(10)   | 0.880(2)   |
| N(4')-C(2'')  | 1.3376(14) |
| N(4')-C(3')   | 1.4472(14) |
| N(4')-H(4')   | 0.880(2)   |
| C(2)-C(3)     | 1.3845(14) |
| C(2)-C(7)     | 1.4503(15) |
| C(3)-C(4)     | 1.4008(14) |
| C(3)-H(3)     | 0.9500     |
| C(4)-C(5)     | 1.3867(14) |
| C(5)-H(5)     | 0.9500     |
| C(6)-H(6A)    | 0.9800     |
| C(6)-H(6B)    | 0.9800     |
| C(6)-H(6C)    | 0.9800     |
| C(1')-C(2')   | 1.5156(15) |
| C(2')-C(3')   | 1.5172(16) |
| C(2')-H(2'1)  | 0.9900     |
| C(2')-H(2'2)  | 0.9900     |
| C(3')-H(3'1)  | 0.9900     |
| C(3')-H(3'2)  | 0.9900     |
| C(4'')-C(5'') | 1.5122(17) |
| C(4'')-C(7'') | 1.5191(17) |
| C(4'')-C(6'') | 1.5191(17) |
| C(5'')-H(5'1) | 0.9800     |
| C(5'')-H(5'2) | 0.9800     |
| C(5'')-H(5'3) | 0.9800     |
| C(6'')-H(6'1) | 0.9800     |
| C(6'')-H(6'2) | 0.9800     |
| C(6'')-H(6'3) | 0.9800     |
| C(7'')-H(7'1) | 0.9800     |
| C(7'')-H(7'2) | 0.9800     |
| C(7'')-H(7'3) | 0.9800     |
| C(1S)-O(1S)   | 1.4014(16) |

|                      |            |
|----------------------|------------|
| C(1S)-H(1S1)         | 0.9800     |
| C(1S)-H(1S2)         | 0.9800     |
| C(1S)-H(1S3)         | 0.9800     |
| O(1S)-H(1S)          | 0.840(2)   |
|                      |            |
| C(7)-O(9)-H(9)       | 109.5(12)  |
| C(2'')-O(2'')-C(4'') | 121.76(8)  |
| C(5)-N(1)-C(2)       | 109.10(9)  |
| C(5)-N(1)-C(6)       | 123.89(9)  |
| C(2)-N(1)-C(6)       | 127.01(9)  |
| C(1')-N(10)-C(4)     | 125.55(9)  |
| C(1')-N(10)-H(10)    | 116.3(11)  |
| C(4)-N(10)-H(10)     | 118.1(11)  |
| C(2'')-N(4'')-C(3'') | 122.83(9)  |
| C(2'')-N(4'')-H(4'') | 120.7(11)  |
| C(3'')-N(4'')-H(4'') | 116.4(11)  |
| N(1)-C(2)-C(3)       | 108.13(9)  |
| N(1)-C(2)-C(7)       | 123.74(9)  |
| C(3)-C(2)-C(7)       | 128.11(9)  |
| C(2)-C(3)-C(4)       | 107.13(9)  |
| C(2)-C(3)-H(3)       | 126.4      |
| C(4)-C(3)-H(3)       | 126.4      |
| C(5)-C(4)-N(10)      | 128.97(9)  |
| C(5)-C(4)-C(3)       | 107.51(9)  |
| N(10)-C(4)-C(3)      | 123.52(9)  |
| N(1)-C(5)-C(4)       | 108.13(9)  |
| N(1)-C(5)-H(5)       | 125.9      |
| C(4)-C(5)-H(5)       | 125.9      |
| N(1)-C(6)-H(6A)      | 109.5      |
| N(1)-C(6)-H(6B)      | 109.5      |
| H(6A)-C(6)-H(6B)     | 109.5      |
| N(1)-C(6)-H(6C)      | 109.5      |
| H(6A)-C(6)-H(6C)     | 109.5      |
| H(6B)-C(6)-H(6C)     | 109.5      |
| O(8)-C(7)-O(9)       | 123.41(10) |
| O(8)-C(7)-C(2)       | 124.20(10) |
| O(9)-C(7)-C(2)       | 112.39(9)  |
| O(5')-C(1')-N(10)    | 122.29(10) |
| O(5')-C(1')-C(2')    | 123.88(10) |
| N(10)-C(1')-C(2')    | 113.83(9)  |
| C(1')-C(2')-C(3')    | 113.91(9)  |
| C(1')-C(2')-H(2'1)   | 108.8      |
| C(3')-C(2')-H(2'1)   | 108.8      |
| C(1')-C(2')-H(2'2)   | 108.8      |
| C(3')-C(2')-H(2'2)   | 108.8      |
| H(2'1)-C(2')-H(2'2)  | 107.7      |

|                      |            |
|----------------------|------------|
| N(4')-C(3')-C(2')    | 113.29(9)  |
| N(4')-C(3')-H(3'1)   | 108.9      |
| C(2')-C(3')-H(3'1)   | 108.9      |
| N(4')-C(3')-H(3'2)   | 108.9      |
| C(2')-C(3')-H(3'2)   | 108.9      |
| H(3'1)-C(3')-H(3'2)  | 107.7      |
| O(1'')-C(2'')-N(4')  | 124.89(10) |
| O(1'')-C(2'')-O(2'') | 125.30(10) |
| N(4')-C(2'')-O(2'')  | 109.81(9)  |
| O(2'')-C(4'')-C(5'') | 110.60(9)  |
| O(2'')-C(4'')-C(7'') | 101.65(9)  |
| C(5'')-C(4'')-C(7'') | 110.29(11) |
| O(2'')-C(4'')-C(6'') | 109.64(10) |
| C(5'')-C(4'')-C(6'') | 112.97(9)  |
| C(7'')-C(4'')-C(6'') | 111.13(11) |
| C(4'')-C(5'')-H(5'1) | 109.5      |
| C(4'')-C(5'')-H(5'2) | 109.5      |
| H(5'1)-C(5'')-H(5'2) | 109.5      |
| C(4'')-C(5'')-H(5'3) | 109.5      |
| H(5'1)-C(5'')-H(5'3) | 109.5      |
| H(5'2)-C(5'')-H(5'3) | 109.5      |
| C(4'')-C(6'')-H(6'1) | 109.5      |
| C(4'')-C(6'')-H(6'2) | 109.5      |
| H(6'1)-C(6'')-H(6'2) | 109.5      |
| C(4'')-C(6'')-H(6'3) | 109.5      |
| H(6'1)-C(6'')-H(6'3) | 109.5      |
| H(6'2)-C(6'')-H(6'3) | 109.5      |
| C(4'')-C(7'')-H(7'1) | 109.5      |
| C(4'')-C(7'')-H(7'2) | 109.5      |
| H(7'1)-C(7'')-H(7'2) | 109.5      |
| C(4'')-C(7'')-H(7'3) | 109.5      |
| H(7'1)-C(7'')-H(7'3) | 109.5      |
| H(7'2)-C(7'')-H(7'3) | 109.5      |
| O(1S)-C(1S)-H(1S1)   | 109.5      |
| O(1S)-C(1S)-H(1S2)   | 109.5      |
| H(1S1)-C(1S)-H(1S2)  | 109.5      |
| O(1S)-C(1S)-H(1S3)   | 109.5      |
| H(1S1)-C(1S)-H(1S3)  | 109.5      |
| H(1S2)-C(1S)-H(1S3)  | 109.5      |
| C(1S)-O(1S)-H(1S)    | 103.4(14)  |

---



**X-ray Table 10.** Anisotropic displacement parameters ( $\text{\AA}^2 \times 10^3$ ) for Boc- $\beta$ -Py-COOH (methanol solvate). The anisotropic displacement factor exponent takes the form:  $-2\pi^2 [ h^2 a^{*2}U^{11} + \dots + 2 h k a^* b^* U^{12} ]$

|        | U <sup>11</sup> | U <sup>22</sup> | U <sup>33</sup> | U <sup>23</sup> | U <sup>13</sup> | U <sup>12</sup> |
|--------|-----------------|-----------------|-----------------|-----------------|-----------------|-----------------|
| O(8)   | 18(1)           | 19(1)           | 20(1)           | -4(1)           | -1(1)           | 1(1)            |
| O(9)   | 17(1)           | 18(1)           | 23(1)           | -4(1)           | -3(1)           | 3(1)            |
| O(5')  | 19(1)           | 21(1)           | 21(1)           | -2(1)           | -4(1)           | 4(1)            |
| O(1'') | 19(1)           | 32(1)           | 17(1)           | -1(1)           | -4(1)           | -5(1)           |
| O(2'') | 16(1)           | 30(1)           | 13(1)           | -1(1)           | 0(1)            | 1(1)            |
| N(1)   | 13(1)           | 18(1)           | 15(1)           | 0(1)            | 0(1)            | 1(1)            |
| N(10)  | 14(1)           | 18(1)           | 15(1)           | -1(1)           | -2(1)           | 1(1)            |
| N(4)   | 16(1)           | 26(1)           | 15(1)           | -2(1)           | 0(1)            | 2(1)            |
| C(2)   | 13(1)           | 16(1)           | 16(1)           | 0(1)            | 1(1)            | 0(1)            |
| C(3)   | 13(1)           | 16(1)           | 16(1)           | 1(1)            | 1(1)            | 0(1)            |
| C(4)   | 14(1)           | 16(1)           | 14(1)           | 0(1)            | 1(1)            | 0(1)            |
| C(5)   | 14(1)           | 17(1)           | 16(1)           | -1(1)           | 0(1)            | 2(1)            |
| C(6)   | 17(1)           | 24(1)           | 18(1)           | -3(1)           | -4(1)           | 2(1)            |
| C(7)   | 13(1)           | 17(1)           | 16(1)           | 1(1)            | 3(1)            | -1(1)           |
| C(1')  | 13(1)           | 18(1)           | 17(1)           | -2(1)           | 2(1)            | 0(1)            |
| C(2')  | 16(1)           | 21(1)           | 21(1)           | -5(1)           | -1(1)           | 0(1)            |
| C(3')  | 20(1)           | 18(1)           | 21(1)           | -3(1)           | 4(1)            | -2(1)           |
| C(2'') | 17(1)           | 16(1)           | 16(1)           | -2(1)           | 0(1)            | -1(1)           |
| C(4'') | 19(1)           | 29(1)           | 15(1)           | -1(1)           | 3(1)            | 1(1)            |
| C(5'') | 26(1)           | 25(1)           | 20(1)           | 1(1)            | 1(1)            | -5(1)           |
| C(6'') | 37(1)           | 26(1)           | 19(1)           | -2(1)           | 5(1)            | 6(1)            |
| C(7'') | 18(1)           | 56(1)           | 26(1)           | 0(1)            | 3(1)            | 2(1)            |
| C(1S)  | 24(1)           | 40(1)           | 46(1)           | 0(1)            | -5(1)           | -1(1)           |
| O(1S)  | 20(1)           | 29(1)           | 31(1)           | -5(1)           | -1(1)           | 6(1)            |

**X-ray Table 11.** Hydrogen coordinates ( $\times 10^4$ ) and isotropic displacement parameters ( $\text{\AA}^2 \times 10^{-3}$ ) for Boc- $\beta$ -Py-COOH (methanol solvate).

|        | x        | y         | z       | U(eq) |
|--------|----------|-----------|---------|-------|
| H(3)   | 4248     | 10886     | 3894    | 18    |
| H(5)   | 7796     | 8186      | 4605    | 19    |
| H(6A)  | 8893     | 9931      | 5371    | 30    |
| H(6B)  | 7675     | 11150     | 5594    | 30    |
| H(6C)  | 8867     | 11736     | 5167    | 30    |
| H(2'1) | 5119     | 5945      | 2900    | 23    |
| H(2'2) | 4046     | 5171      | 3333    | 23    |
| H(3'1) | 5937     | 3185      | 3552    | 23    |
| H(3'2) | 5319     | 3155      | 2902    | 23    |
| H(5'1) | 8494     | 5596      | 1517    | 35    |
| H(5'2) | 10221    | 5902      | 1352    | 35    |
| H(5'3) | 9679     | 6657      | 1912    | 35    |
| H(6'1) | 10163    | 1845      | 1890    | 41    |
| H(6'2) | 10459    | 2770      | 1329    | 41    |
| H(6'3) | 8741     | 2675      | 1524    | 41    |
| H(7'1) | 11998    | 5375      | 2438    | 50    |
| H(7'2) | 12472    | 4558      | 1877    | 50    |
| H(7'3) | 12199    | 3494      | 2411    | 50    |
| H(1S1) | 10755    | 5118      | 4121    | 56    |
| H(1S2) | 11388    | 3345      | 4208    | 56    |
| H(1S3) | 10807    | 4302      | 4724    | 56    |
| H(1S)  | 8553(19) | 4321(15)  | 4238(8) | 48(5) |
| H(10)  | 4672(13) | 8132(19)  | 3442(4) | 27(4) |
| H(9)   | 4130(20) | 14455(10) | 4624(7) | 36(5) |
| H(4')  | 8251(14) | 3900(20)  | 3331(5) | 35(4) |

**X-ray Table 12.** Torsion angles [°] for Boc-β-Py-COOH (methanol solvate).

---

|                             |             |
|-----------------------------|-------------|
| C(5)-N(1)-C(2)-C(3)         | -0.16(12)   |
| C(6)-N(1)-C(2)-C(3)         | 179.66(10)  |
| C(5)-N(1)-C(2)-C(7)         | 178.28(9)   |
| C(6)-N(1)-C(2)-C(7)         | -1.90(17)   |
| N(1)-C(2)-C(3)-C(4)         | 0.32(12)    |
| C(7)-C(2)-C(3)-C(4)         | -178.04(10) |
| C(1')-N(10)-C(4)-C(5)       | 10.61(17)   |
| C(1')-N(10)-C(4)-C(3)       | -169.68(10) |
| C(2)-C(3)-C(4)-C(5)         | -0.35(12)   |
| C(2)-C(3)-C(4)-N(10)        | 179.89(9)   |
| C(2)-N(1)-C(5)-C(4)         | -0.07(12)   |
| C(6)-N(1)-C(5)-C(4)         | -179.89(10) |
| N(10)-C(4)-C(5)-N(1)        | 180.00(10)  |
| C(3)-C(4)-C(5)-N(1)         | 0.26(12)    |
| N(1)-C(2)-C(7)-O(8)         | 1.07(17)    |
| C(3)-C(2)-C(7)-O(8)         | 179.19(11)  |
| N(1)-C(2)-C(7)-O(9)         | -178.88(9)  |
| C(3)-C(2)-C(7)-O(9)         | -0.76(15)   |
| C(4)-N(10)-C(1')-O(5')      | -2.01(17)   |
| C(4)-N(10)-C(1')-C(2')      | 177.13(9)   |
| O(5')-C(1')-C(2')-C(3')     | -12.27(15)  |
| N(10)-C(1')-C(2')-C(3')     | 168.60(9)   |
| C(2'')-N(4')-C(3')-C(2')    | -86.69(13)  |
| C(1')-C(2')-C(3')-N(4')     | -62.04(13)  |
| C(3')-N(4')-C(2'')-O(1'')   | 0.67(18)    |
| C(3')-N(4')-C(2'')-O(2'')   | -179.82(9)  |
| C(4'')-O(2'')-C(2'')-O(1'') | -2.13(17)   |
| C(4'')-O(2'')-C(2'')-N(4')  | 178.37(9)   |
| C(2'')-O(2'')-C(4'')-C(5'') | 60.66(13)   |
| C(2'')-O(2'')-C(4'')-C(7'') | 177.77(10)  |
| C(2'')-O(2'')-C(4'')-C(6'') | -64.57(13)  |

---

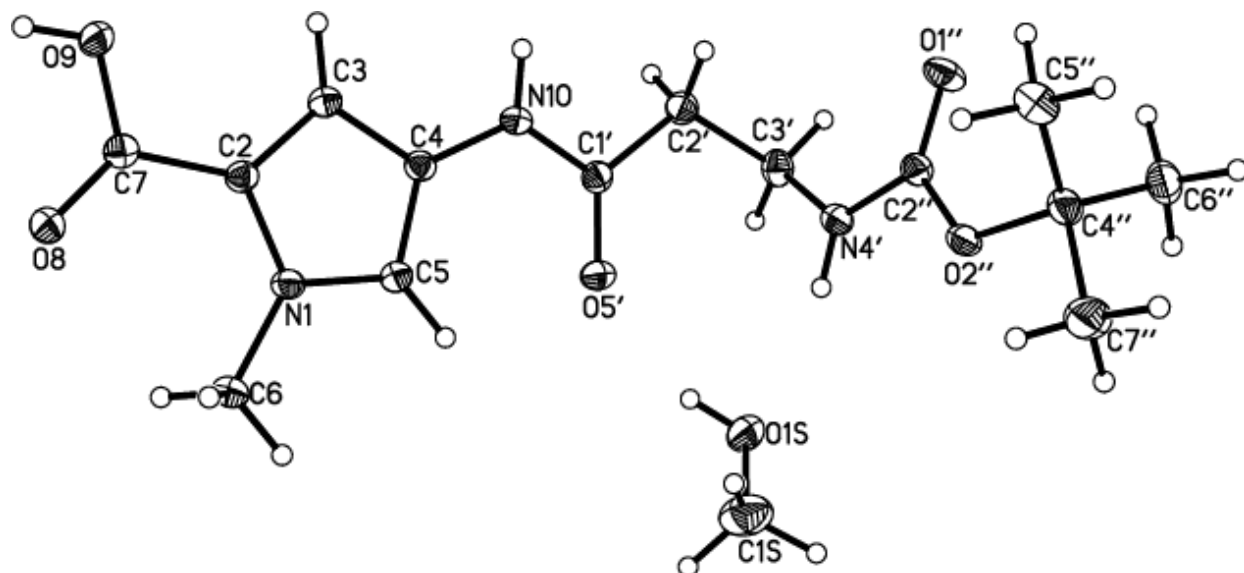

**Figure X-ray 3.** Projection view with 50% thermal ellipsoids for Boc- $\beta$ -Py-COOH (methanol solvate).

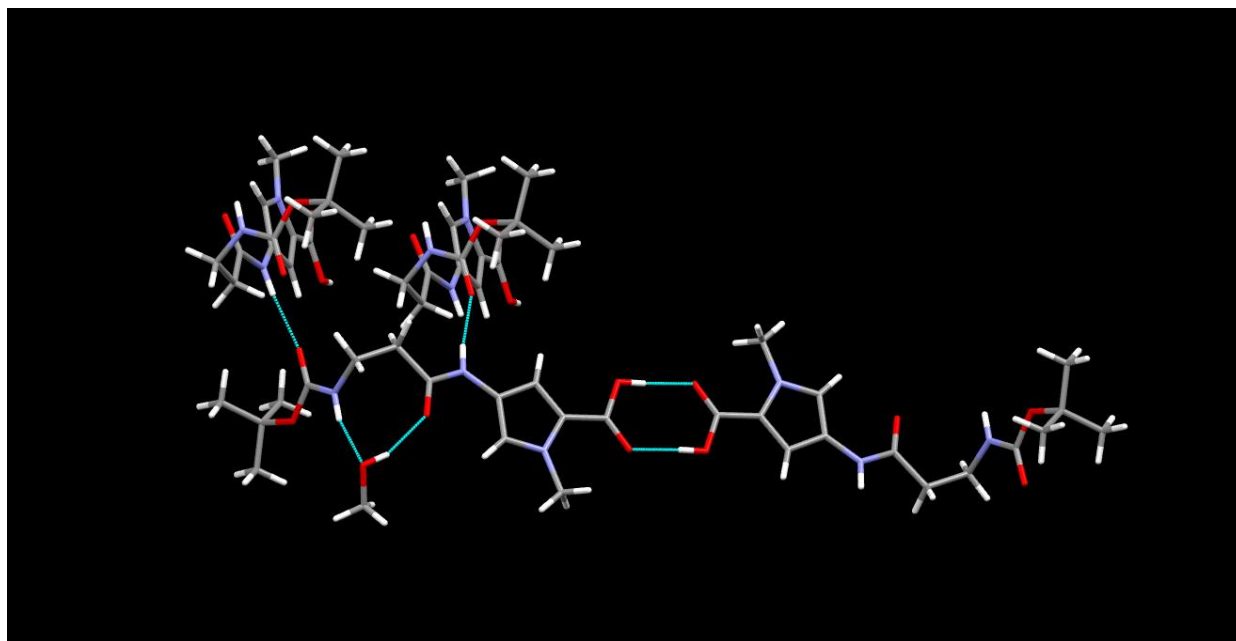

**Figure X-ray 4.** Intermolecular H-bonding for Boc- $\beta$ -Py-COOH (methanol solvate):

**X-ray Table 13.** Crystal data and structure refinement for Boc-Py-beta-COOH·0.5dioxane solvate.

|                                   |                                                               |                 |
|-----------------------------------|---------------------------------------------------------------|-----------------|
| Identification code               | bas1912/b1912                                                 |                 |
| Empirical formula                 | C <sub>17</sub> H <sub>27</sub> N <sub>3</sub> O <sub>6</sub> |                 |
| Formula weight                    | 369.42                                                        |                 |
| Temperature                       | 100(2) K                                                      |                 |
| Wavelength                        | 0.71073 Å                                                     |                 |
| Crystal system                    | Monoclinic                                                    |                 |
| Space group                       | P2 <sub>1</sub> /n                                            |                 |
| Unit cell dimensions              | a = 12.2285(9) Å                                              | α = 90°.        |
|                                   | b = 8.4147(6) Å                                               | β = 104.836(4)° |
|                                   | c = 18.9773(15) Å                                             | γ = 90°.        |
| Volume                            | 1887.6(2) Å <sup>3</sup>                                      |                 |
| Z                                 | 4                                                             |                 |
| Density (calculated)              | 1.300 Mg/m <sup>3</sup>                                       |                 |
| Absorption coefficient            | 0.099 mm <sup>-1</sup>                                        |                 |
| F(000)                            | 792                                                           |                 |
| Crystal size                      | 0.37 x 0.23 x 0.08 mm <sup>3</sup>                            |                 |
| Theta range for data collection   | 1.79 to 27.23°                                                |                 |
| Index ranges                      | -15 ≤ h ≤ 15, -10 ≤ k ≤ 10, -24 ≤ l ≤ 24                      |                 |
| Reflections collected             | 63224                                                         |                 |
| Independent reflections           | 4196 [R(int) = 0.0703]                                        |                 |
| Completeness to theta = 25.00°    | 100.0 %                                                       |                 |
| Absorption correction             | Semi-empirical from equivalents                               |                 |
| Max. and min. transmission        | 0.9918 and 0.9643                                             |                 |
| Refinement method                 | Full-matrix least-squares on F <sup>2</sup>                   |                 |
| Data / restraints / parameters    | 4196 / 0 / 240                                                |                 |
| Goodness-of-fit on F <sup>2</sup> | 1.022                                                         |                 |
| Final R indices [I > 2σ(I)]       | R1 = 0.0391, wR2 = 0.0888                                     |                 |
| R indices (all data)              | R1 = 0.0652, wR2 = 0.1018                                     |                 |
| Largest diff. peak and hole       | 0.232 and -0.238 e.Å <sup>-3</sup>                            |                 |

**X-ray Table 14.** Atomic coordinates ( $\times 10^4$ ) and equivalent isotropic displacement parameters ( $\text{\AA}^2 \times 10^3$ )

for Boc-Py-beta-COOH·0.5dioxane solvate.  $U(\text{eq})$  is defined as one third of the trace of the orthogonalized  $U^{ij}$  tensor.

|       | x       | y       | z        | $U(\text{eq})$ |
|-------|---------|---------|----------|----------------|
| O(1)  | 1250(1) | 6466(1) | 2157(1)  | 19(1)          |
| O(2)  | 768(1)  | 3962(1) | -1137(1) | 24(1)          |
| O(3)  | 3977(1) | 3515(1) | 6266(1)  | 22(1)          |
| O(4)  | 2261(1) | 4751(2) | 5877(1)  | 28(1)          |
| O(5)  | -3(1)   | 2750(2) | -350(1)  | 39(1)          |
| N(1)  | 1146(1) | 5508(2) | 3606(1)  | 18(1)          |
| N(2)  | 2488(1) | 4447(2) | 2178(1)  | 17(1)          |
| N(3)  | 3281(1) | 3911(2) | 5101(1)  | 22(1)          |
| C(2)  | 1513(1) | 5134(2) | 4328(1)  | 21(1)          |
| C(3)  | 2569(1) | 4451(2) | 4446(1)  | 19(1)          |
| C(4)  | 2848(1) | 4390(2) | 3776(1)  | 17(1)          |
| C(5)  | 1954(1) | 5054(2) | 3262(1)  | 16(1)          |
| C(6)  | 7(1)    | 6110(2) | 3286(1)  | 23(1)          |
| C(7)  | 1859(1) | 5364(2) | 2490(1)  | 16(1)          |
| C(8)  | 2560(1) | 4700(2) | 1429(1)  | 19(1)          |
| C(9)  | 1671(1) | 3769(2) | 877(1)   | 18(1)          |
| C(10) | 1751(1) | 4122(2) | 104(1)   | 20(1)          |
| C(11) | 755(1)  | 3519(2) | -470(1)  | 20(1)          |
| C(12) | 3092(1) | 4125(2) | 5763(1)  | 20(1)          |
| C(13) | 4031(1) | 3592(2) | 7043(1)  | 20(1)          |
| C(14) | 5136(1) | 2745(2) | 7376(1)  | 23(1)          |
| C(15) | 4093(2) | 5305(2) | 7286(1)  | 33(1)          |
| C(16) | 3057(1) | 2688(3) | 7203(1)  | 35(1)          |
| O(1S) | 4870(1) | 4508(2) | 684(1)   | 39(1)          |
| C(1S) | 5692(2) | 3808(3) | 369(1)   | 43(1)          |
| C(2S) | 4678(2) | 6114(2) | 441(1)   | 42(1)          |

**X-ray Table 15.** Bond lengths [Å] and angles [°] for Boc-Py-beta-COOH.

---

|               |            |
|---------------|------------|
| O(1)-C(7)     | 1.2540(18) |
| O(2)-C(11)    | 1.3242(18) |
| O(2)-H(2A)    | 0.8400     |
| O(3)-C(12)    | 1.3473(18) |
| O(3)-C(13)    | 1.4613(18) |
| O(4)-C(12)    | 1.2120(19) |
| O(5)-C(11)    | 1.1987(19) |
| N(1)-C(2)     | 1.3646(19) |
| N(1)-C(5)     | 1.3714(19) |
| N(1)-C(6)     | 1.4602(19) |
| N(2)-C(7)     | 1.3315(19) |
| N(2)-C(8)     | 1.4603(18) |
| N(2)-H(2B)    | 0.8800     |
| N(3)-C(12)    | 1.346(2)   |
| N(3)-C(3)     | 1.3983(19) |
| N(3)-H(3)     | 0.8800     |
| C(2)-C(3)     | 1.378(2)   |
| C(2)-H(2)     | 0.9500     |
| C(3)-C(4)     | 1.399(2)   |
| C(4)-C(5)     | 1.384(2)   |
| C(4)-H(4)     | 0.9500     |
| C(5)-C(7)     | 1.462(2)   |
| C(6)-H(6A)    | 0.9800     |
| C(6)-H(6B)    | 0.9800     |
| C(6)-H(6C)    | 0.9800     |
| C(8)-C(9)     | 1.520(2)   |
| C(8)-H(8A)    | 0.9900     |
| C(8)-H(8B)    | 0.9900     |
| C(9)-C(10)    | 1.523(2)   |
| C(9)-H(9A)    | 0.9900     |
| C(9)-H(9B)    | 0.9900     |
| C(10)-C(11)   | 1.499(2)   |
| C(10)-H(10A)  | 0.9900     |
| C(10)-H(10B)  | 0.9900     |
| C(13)-C(16)   | 1.508(2)   |
| C(13)-C(15)   | 1.509(2)   |
| C(13)-C(14)   | 1.515(2)   |
| C(14)-H(14A)  | 0.9800     |
| C(14)-H(14B)  | 0.9800     |
| C(14)-H(14C)  | 0.9800     |
| C(15)-H(15A)  | 0.9800     |
| C(15)-H(15B)  | 0.9800     |
| C(15)-H(15C)  | 0.9800     |
| C(16)-H(16A)  | 0.9800     |
| C(16)-H(16B)  | 0.9800     |
| C(16)-H(16C)  | 0.9800     |
| O(1S)-C(1S)   | 1.423(2)   |
| O(1S)-C(2S)   | 1.428(2)   |
| C(1S)-C(2S)#1 | 1.487(3)   |

|                  |            |
|------------------|------------|
| C(1S)-H(1S1)     | 0.9900     |
| C(1S)-H(1S2)     | 0.9900     |
| C(2S)-C(1S)#1    | 1.487(3)   |
| C(2S)-H(2S1)     | 0.9900     |
| C(2S)-H(2S2)     | 0.9900     |
|                  |            |
| C(11)-O(2)-H(2A) | 109.5      |
| C(12)-O(3)-C(13) | 121.23(12) |
| C(2)-N(1)-C(5)   | 108.76(12) |
| C(2)-N(1)-C(6)   | 122.06(13) |
| C(5)-N(1)-C(6)   | 128.77(12) |
| C(7)-N(2)-C(8)   | 122.29(13) |
| C(7)-N(2)-H(2B)  | 118.9      |
| C(8)-N(2)-H(2B)  | 118.9      |
| C(12)-N(3)-C(3)  | 124.70(13) |
| C(12)-N(3)-H(3)  | 117.7      |
| C(3)-N(3)-H(3)   | 117.7      |
| N(1)-C(2)-C(3)   | 108.31(13) |
| N(1)-C(2)-H(2)   | 125.8      |
| C(3)-C(2)-H(2)   | 125.8      |
| C(2)-C(3)-N(3)   | 128.68(14) |
| C(2)-C(3)-C(4)   | 107.66(13) |
| N(3)-C(3)-C(4)   | 123.66(13) |
| C(5)-C(4)-C(3)   | 107.09(13) |
| C(5)-C(4)-H(4)   | 126.5      |
| C(3)-C(4)-H(4)   | 126.5      |
| N(1)-C(5)-C(4)   | 108.17(13) |
| N(1)-C(5)-C(7)   | 123.01(13) |
| C(4)-C(5)-C(7)   | 128.68(14) |
| N(1)-C(6)-H(6A)  | 109.5      |
| N(1)-C(6)-H(6B)  | 109.5      |
| H(6A)-C(6)-H(6B) | 109.5      |
| N(1)-C(6)-H(6C)  | 109.5      |
| H(6A)-C(6)-H(6C) | 109.5      |
| H(6B)-C(6)-H(6C) | 109.5      |
| O(1)-C(7)-N(2)   | 122.67(13) |
| O(1)-C(7)-C(5)   | 121.45(13) |
| N(2)-C(7)-C(5)   | 115.83(13) |
| N(2)-C(8)-C(9)   | 112.66(12) |
| N(2)-C(8)-H(8A)  | 109.1      |
| C(9)-C(8)-H(8A)  | 109.1      |
| N(2)-C(8)-H(8B)  | 109.1      |
| C(9)-C(8)-H(8B)  | 109.1      |
| H(8A)-C(8)-H(8B) | 107.8      |
| C(8)-C(9)-C(10)  | 110.66(12) |
| C(8)-C(9)-H(9A)  | 109.5      |
| C(10)-C(9)-H(9A) | 109.5      |
| C(8)-C(9)-H(9B)  | 109.5      |
| C(10)-C(9)-H(9B) | 109.5      |
| H(9A)-C(9)-H(9B) | 108.1      |
| C(11)-C(10)-C(9) | 113.17(13) |



|                      |            |
|----------------------|------------|
| C(11)-C(10)-H(10A)   | 108.9      |
| C(9)-C(10)-H(10A)    | 108.9      |
| C(11)-C(10)-H(10B)   | 108.9      |
| C(9)-C(10)-H(10B)    | 108.9      |
| H(10A)-C(10)-H(10B)  | 107.8      |
| O(5)-C(11)-O(2)      | 122.15(14) |
| O(5)-C(11)-C(10)     | 124.65(14) |
| O(2)-C(11)-C(10)     | 113.17(13) |
| O(4)-C(12)-N(3)      | 125.19(14) |
| O(4)-C(12)-O(3)      | 126.69(14) |
| N(3)-C(12)-O(3)      | 108.11(13) |
| O(3)-C(13)-C(16)     | 110.29(13) |
| O(3)-C(13)-C(15)     | 109.66(13) |
| C(16)-C(13)-C(15)    | 113.64(15) |
| O(3)-C(13)-C(14)     | 101.83(12) |
| C(16)-C(13)-C(14)    | 110.15(14) |
| C(15)-C(13)-C(14)    | 110.63(14) |
| C(13)-C(14)-H(14A)   | 109.5      |
| C(13)-C(14)-H(14B)   | 109.5      |
| H(14A)-C(14)-H(14B)  | 109.5      |
| C(13)-C(14)-H(14C)   | 109.5      |
| H(14A)-C(14)-H(14C)  | 109.5      |
| H(14B)-C(14)-H(14C)  | 109.5      |
| C(13)-C(15)-H(15A)   | 109.5      |
| C(13)-C(15)-H(15B)   | 109.5      |
| H(15A)-C(15)-H(15B)  | 109.5      |
| C(13)-C(15)-H(15C)   | 109.5      |
| H(15A)-C(15)-H(15C)  | 109.5      |
| H(15B)-C(15)-H(15C)  | 109.5      |
| C(13)-C(16)-H(16A)   | 109.5      |
| C(13)-C(16)-H(16B)   | 109.5      |
| H(16A)-C(16)-H(16B)  | 109.5      |
| C(13)-C(16)-H(16C)   | 109.5      |
| H(16A)-C(16)-H(16C)  | 109.5      |
| H(16B)-C(16)-H(16C)  | 109.5      |
| C(1S)-O(1S)-C(2S)    | 109.34(14) |
| O(1S)-C(1S)-C(2S)#1  | 110.82(16) |
| O(1S)-C(1S)-H(1S1)   | 109.5      |
| C(2S)#1-C(1S)-H(1S1) | 109.5      |
| O(1S)-C(1S)-H(1S2)   | 109.5      |
| C(2S)#1-C(1S)-H(1S2) | 109.5      |
| H(1S1)-C(1S)-H(1S2)  | 108.1      |
| O(1S)-C(2S)-C(1S)#1  | 110.96(18) |
| O(1S)-C(2S)-H(2S1)   | 109.4      |
| C(1S)#1-C(2S)-H(2S1) | 109.4      |
| O(1S)-C(2S)-H(2S2)   | 109.4      |
| C(1S)#1-C(2S)-H(2S2) | 109.4      |
| H(2S1)-C(2S)-H(2S2)  | 108.0      |

---

Symmetry transformations used to generate equivalent atoms:

#1 -x+1,-y+1,-z

**X-ray Table 16.** Anisotropic displacement parameters ( $\text{\AA}^2 \times 10^3$ ) for Boc-Py-beta-COOH•0.5dioxane solvate. The anisotropic displacement factor exponent takes the form:  $-2\pi^2 [ h^2 a^{*2}U^{11} + \dots + 2 h k a^* b^* U^{12} ]$

|       | $U^{11}$ | $U^{22}$ | $U^{33}$ | $U^{23}$ | $U^{13}$ | $U^{12}$ |
|-------|----------|----------|----------|----------|----------|----------|
| O(1)  | 20(1)    | 18(1)    | 17(1)    | 2(1)     | 0(1)     | 1(1)     |
| O(2)  | 23(1)    | 33(1)    | 15(1)    | 2(1)     | 2(1)     | -3(1)    |
| O(3)  | 22(1)    | 31(1)    | 12(1)    | 2(1)     | 2(1)     | 8(1)     |
| O(4)  | 23(1)    | 41(1)    | 20(1)    | 2(1)     | 6(1)     | 10(1)    |
| O(5)  | 34(1)    | 56(1)    | 23(1)    | 7(1)     | 0(1)     | -24(1)   |
| N(1)  | 17(1)    | 21(1)    | 15(1)    | 0(1)     | 2(1)     | 4(1)     |
| N(2)  | 17(1)    | 18(1)    | 15(1)    | 2(1)     | 2(1)     | 1(1)     |
| N(3)  | 21(1)    | 30(1)    | 16(1)    | 2(1)     | 4(1)     | 10(1)    |
| C(2)  | 21(1)    | 25(1)    | 16(1)    | 0(1)     | 6(1)     | 2(1)     |
| C(3)  | 20(1)    | 19(1)    | 16(1)    | 0(1)     | 2(1)     | 2(1)     |
| C(4)  | 17(1)    | 18(1)    | 16(1)    | -1(1)    | 3(1)     | 2(1)     |
| C(5)  | 16(1)    | 15(1)    | 17(1)    | -2(1)    | 3(1)     | -1(1)    |
| C(6)  | 18(1)    | 29(1)    | 21(1)    | 1(1)     | 4(1)     | 6(1)     |
| C(7)  | 14(1)    | 17(1)    | 15(1)    | -1(1)    | 1(1)     | -4(1)    |
| C(8)  | 19(1)    | 23(1)    | 16(1)    | 1(1)     | 6(1)     | -2(1)    |
| C(9)  | 19(1)    | 20(1)    | 16(1)    | 1(1)     | 4(1)     | 0(1)     |
| C(10) | 19(1)    | 24(1)    | 18(1)    | 0(1)     | 5(1)     | -2(1)    |
| C(11) | 21(1)    | 21(1)    | 18(1)    | 2(1)     | 5(1)     | 0(1)     |
| C(12) | 21(1)    | 23(1)    | 16(1)    | 0(1)     | 3(1)     | 2(1)     |
| C(13) | 20(1)    | 27(1)    | 12(1)    | 1(1)     | 2(1)     | 2(1)     |
| C(14) | 21(1)    | 28(1)    | 19(1)    | 2(1)     | 1(1)     | 2(1)     |
| C(15) | 41(1)    | 32(1)    | 24(1)    | -4(1)    | 4(1)     | 9(1)     |
| C(16) | 23(1)    | 54(1)    | 29(1)    | 13(1)    | 5(1)     | -2(1)    |
| O(1S) | 39(1)    | 48(1)    | 36(1)    | 19(1)    | 21(1)    | 10(1)    |
| C(1S) | 36(1)    | 52(1)    | 48(1)    | 25(1)    | 23(1)    | 14(1)    |
| C(2S) | 47(1)    | 41(1)    | 45(1)    | 13(1)    | 26(1)    | 8(1)     |

**X-ray Table 17.** Hydrogen coordinates ( $\times 10^4$ ) and isotropic displacement parameters ( $\text{\AA}^2 \times 10^{-3}$ ) for Boc-Py-beta-COOH $\cdot$ 0.5dioxane solvate.

|        | x    | y    | z     | U(eq) |
|--------|------|------|-------|-------|
| H(2A)  | 160  | 3688 | -1432 | 37    |
| H(2B)  | 2874 | 3661 | 2430  | 21    |
| H(3)   | 3898 | 3395 | 5079  | 27    |
| H(2)   | 1110 | 5314 | 4687  | 25    |
| H(4)   | 3525 | 3971 | 3691  | 20    |
| H(6A)  | -521 | 5636 | 3538  | 34    |
| H(6B)  | -225 | 5830 | 2768  | 34    |
| H(6C)  | 2    | 7269 | 3339  | 34    |
| H(8A)  | 3320 | 4379 | 1389  | 23    |
| H(8B)  | 2466 | 5847 | 1313  | 23    |
| H(9A)  | 909  | 4058 | 925   | 22    |
| H(9B)  | 1782 | 2617 | 976   | 22    |
| H(10A) | 1812 | 5285 | 47    | 24    |
| H(10B) | 2449 | 3630 | 31    | 24    |
| H(14A) | 5090 | 1649 | 7196  | 35    |
| H(14B) | 5275 | 2741 | 7908  | 35    |
| H(14C) | 5755 | 3299 | 7238  | 35    |
| H(15A) | 4719 | 5836 | 7145  | 50    |
| H(15B) | 4220 | 5351 | 7817  | 50    |
| H(15C) | 3381 | 5842 | 7054  | 50    |
| H(16A) | 2349 | 3255 | 6993  | 53    |
| H(16B) | 3170 | 2598 | 7732  | 53    |
| H(16C) | 3020 | 1623 | 6989  | 53    |
| H(1S1) | 5810 | 2685 | 524   | 51    |
| H(1S2) | 6422 | 4374 | 543   | 51    |
| H(2S1) | 5382 | 6734 | 616   | 50    |
| H(2S2) | 4089 | 6593 | 648   | 50    |

**X-ray Table 18.** Torsion angles [°] for Boc-Py-beta-COOH·0.5dioxane solvate.

|                                  |                |
|----------------------------------|----------------|
| C(5)-N(1)-C(2)-C(3)              | 0.62(17)       |
| C(6)-N(1)-C(2)-C(3)              | 173.91(14)     |
| N(1)-C(2)-C(3)-N(3)              | 178.55(15)     |
| N(1)-C(2)-C(3)-C(4)              | -0.69(18)      |
| C(12)-N(3)-C(3)-C(2)             | -7.3(3)        |
| C(12)-N(3)-C(3)-C(4)             | 171.84(15)     |
| C(2)-C(3)-C(4)-C(5)              | 0.49(18)       |
| N(3)-C(3)-C(4)-C(5)              | -178.79(14)    |
| C(2)-N(1)-C(5)-C(4)              | -0.31(17)      |
| C(6)-N(1)-C(5)-C(4)              | -173.01(15)    |
| C(2)-N(1)-C(5)-C(7)              | -176.39(14)    |
| C(6)-N(1)-C(5)-C(7)              | 10.9(2)        |
| C(3)-C(4)-C(5)-N(1)              | -0.12(17)      |
| C(3)-C(4)-C(5)-C(7)              | 175.67(14)     |
| C(8)-N(2)-C(7)-O(1)              | 2.9(2)         |
| C(8)-N(2)-C(7)-C(5)              | -174.63(12)    |
| N(1)-C(5)-C(7)-O(1)              | 23.2(2)        |
| C(4)-C(5)-C(7)-O(1)              | -152.00(15)    |
| N(1)-C(5)-C(7)-N(2)              | -159.19(14)    |
| C(4)-C(5)-C(7)-N(2)              | 25.6(2)        |
| C(7)-N(2)-C(8)-C(9)              | -90.57(17)     |
| N(2)-C(8)-C(9)-C(10)             | 177.79(12)     |
| C(8)-C(9)-C(10)-C(11)            | -167.89(13)    |
| C(9)-C(10)-C(11)-O(5)            | -4.4(2)        |
| C(9)-C(10)-C(11)-O(2)            | 173.62(13)     |
| C(3)-N(3)-C(12)-O(4)             | 3.2(3)         |
| C(3)-N(3)-C(12)-O(3)             | -177.18(14)    |
| C(13)-O(3)-C(12)-O(4)            | -1.6(2)        |
| C(13)-O(3)-C(12)-N(3)            | 178.84(13)     |
| C(12)-O(3)-C(13)-C(16)           | 61.90(18)      |
| C(12)-O(3)-C(13)-C(15)           | -63.97(18)     |
| C(12)-O(3)-C(13)-C(14)           | 178.82(13)     |
| C(2S)-O(1S)-C(1S)-C(2S)#1        | -57.4(3)       |
| <u>C(1S)-O(1S)-C(2S)-C(1S)#1</u> | <u>57.5(2)</u> |

Symmetry transformations used to generate equivalent atoms: #1 -x+1,-y+1,-z

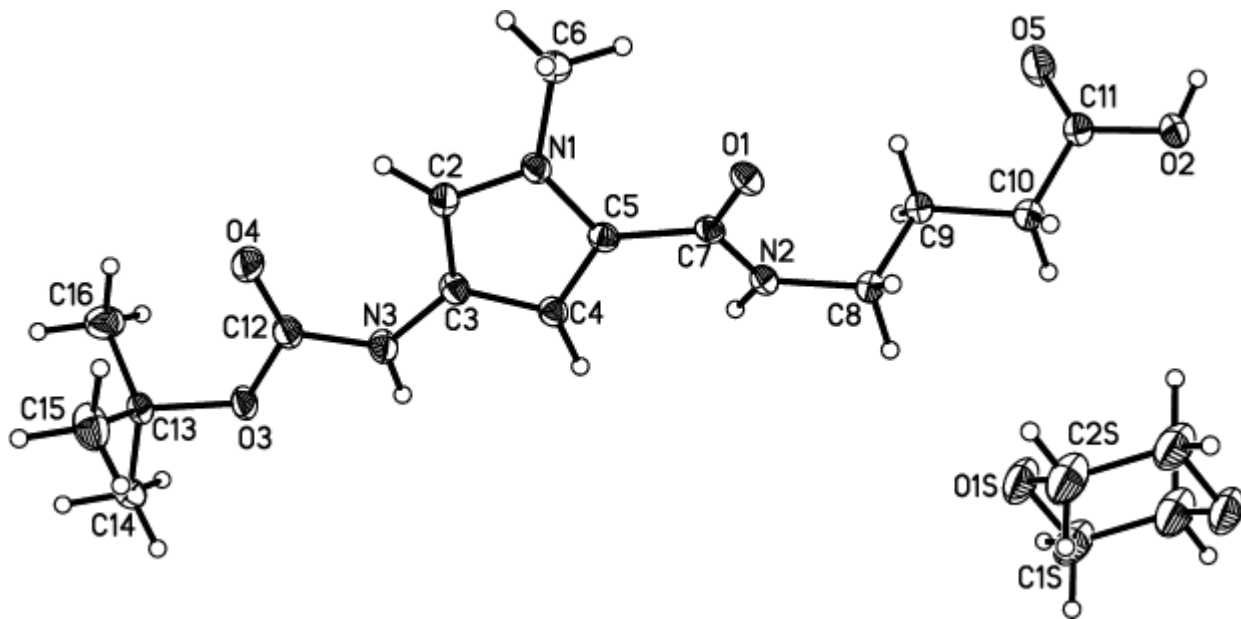

**X-ray Figure 5.** Projection view with 50% thermal ellipsoids for Boc-Py- $\beta$ -COOH·0.5dioxane solvate.

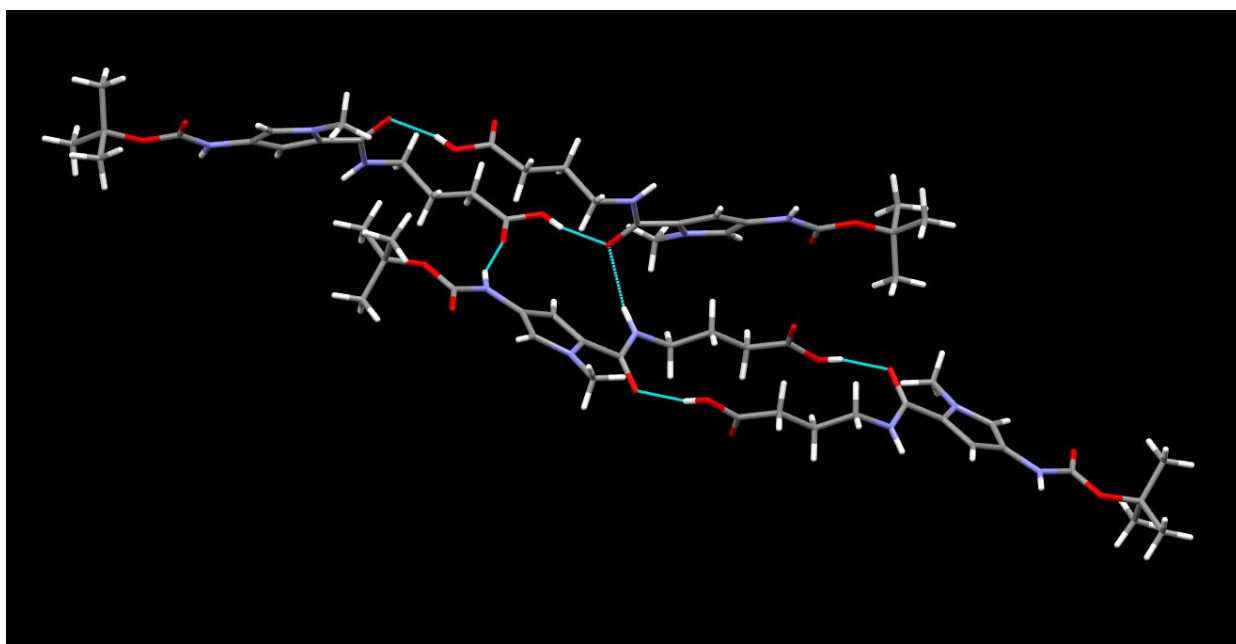

**X-ray Figure 6.** Intermolecular hydrogen bonding in the crystal structure of Boc-Py- $\beta$ -COOH·0.5dioxane solvate.
