# Supplementary material
Source: PubMed Central journal article supplement (PMC4339220)
Supplement: NIHMS622728-supplement-ESI_2.pdf [file NIHMS622728-supplement-ESI_2.pdf]

# KA1033

KA1033

|                        |                      |                   |                                                        |                        |                      |                      |           |
|------------------------|----------------------|-------------------|--------------------------------------------------------|------------------------|----------------------|----------------------|-----------|
| Acquisition Time (sec) | 3.1457               | Comment           | KA1033H                                                | Date                   | 25 Oct 2011 15:32:16 |                      |           |
| Date Stamp             | 25 Oct 2011 15:32:16 | File Name         | \\134.124.122.67\data\ARX500\bashkin\nmr\KA1033H\1\fid |                        |                      |                      |           |
| Frequency (MHz)        | 500.13               | Nucleus           | 1H                                                     | Number of Transients   | 1024                 | Origin               | spect     |
| Original Points Count  | 32768                | Owner             | root                                                   | Points Count           | 32768                | Pulse Sequence       | zq30      |
| Receiver Gain          | 2048.00              | SW(cyclical) (Hz) | 10416.67                                               | Solvent                | DMSO-d6              | Spectrum Offset (Hz) | 3080.2671 |
| Spectrum Type          | STANDARD             | Sweep Width (Hz)  | 10416.35                                               | Temperature (degree C) | 27.000               |                      |           |

<sup>1</sup>H NMR (500MHz, DMSO-d<sub>6</sub>) δ = 10.28 (s, 1 H), 10.26 (s, 1 H), 9.93 (s, 1 H), 9.91 (s, 1 H), 9.89 (s, 1 H), 9.84 (s, 1 H), 9.76 (s, 1 H), 9.23 (br. s., 1 H), 8.09 - 8.00 (m, *J* = 5.7, 10.6, 10.6 Hz, 6 H), 7.58 (s, 1 H), 7.50 (s, 1 H), 7.46 (s, 1 H), 7.39 (d, *J* = 1.6 Hz, 1 H), 7.23 (d, *J* = 1.6 Hz, 1 H), 7.22 (d, *J* = 1.6 Hz, 1 H), 7.16 (s, 3 H), 7.08 (d, *J* = 1.0 Hz, 1 H), 7.07 (s, 2 H), 6.90 - 6.87 (m, 2 H), 4.01 (s, 6 H), 3.94 (s, 3 H), 3.86 (s, 3 H), 3.85 (s, 3 H), 3.84 (s, 3 H), 3.83 (s, 3 H), 3.80 (s, 3 H), 3.42 - 3.35 (m, 2 H), 3.33 - 3.26 (m, 2 H), 3.15 - 3.08 (m, 2 H), 3.04 - 2.97 (m, 2 H), 2.74 (d, *J* = 5.1 Hz, 6 H), 2.38 - 2.33 (m, 2 H), 2.28 (t, *J* = 7.5 Hz, 2 H), 1.85 - 1.78 (m, 2 H), 1.78 - 1.70 (m, 2 H)

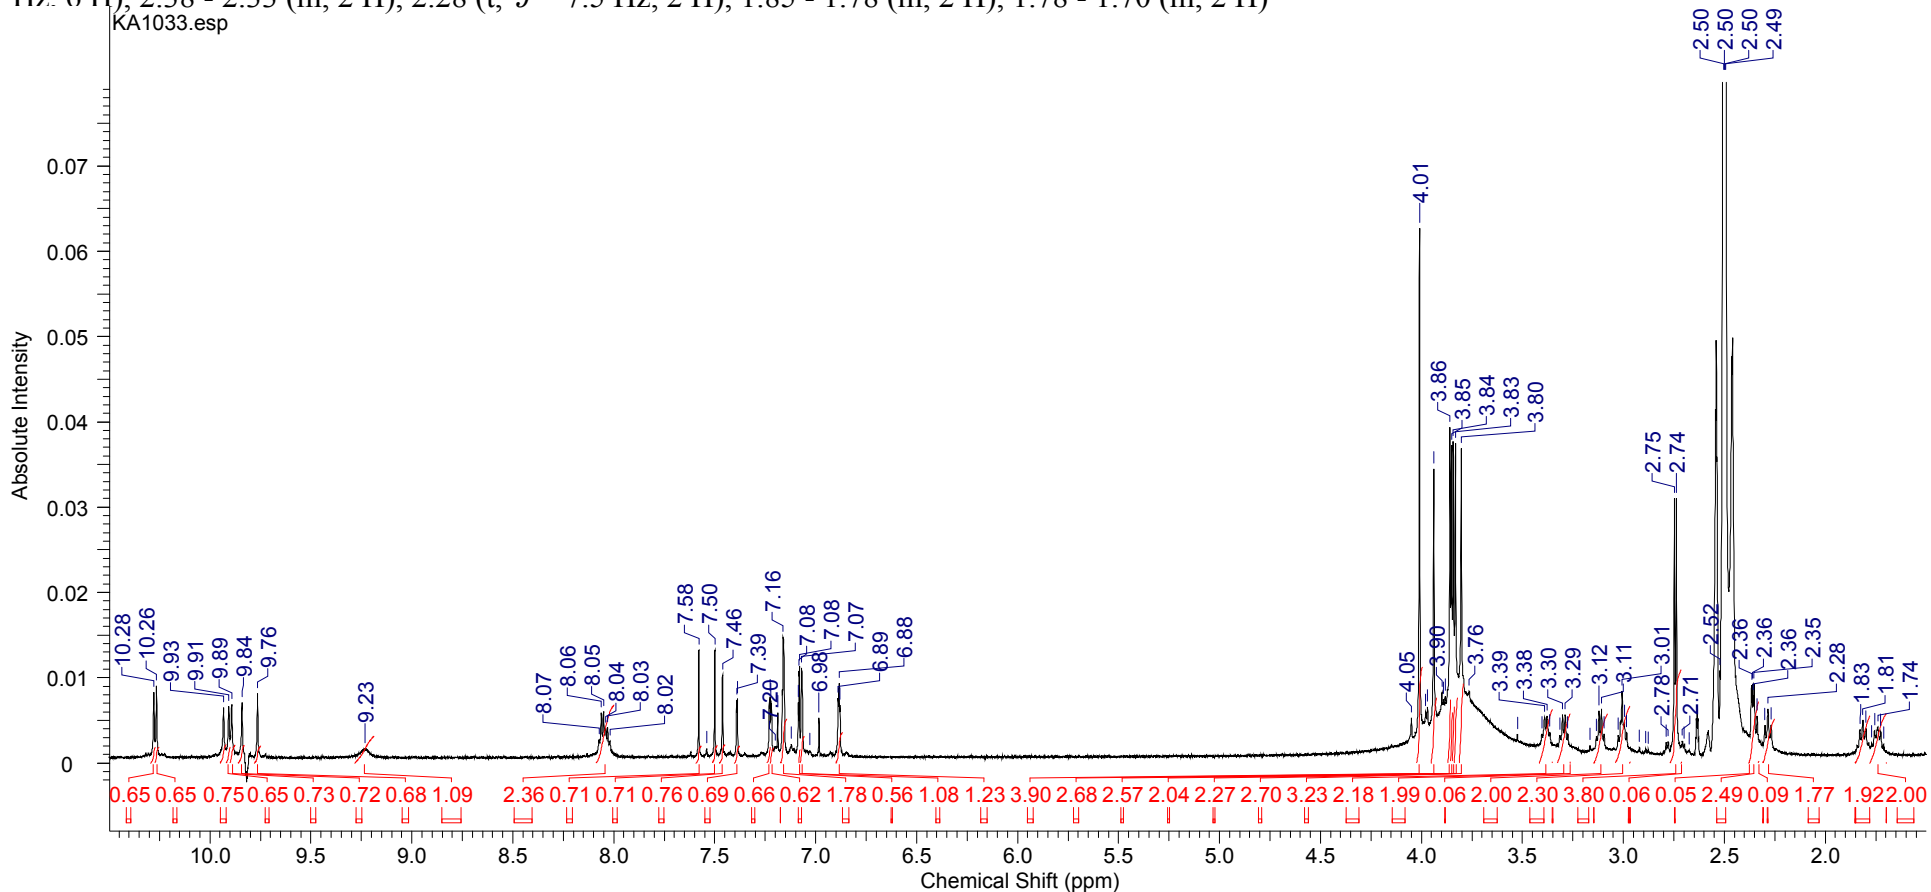

# KA2127

KA2127

|                               |             |                       |                                                                                      |                             |             |                               |         |
|-------------------------------|-------------|-----------------------|--------------------------------------------------------------------------------------|-----------------------------|-------------|-------------------------------|---------|
| <b>Acquisition Time (sec)</b> | 1.7039      | <b>Comment</b>        | Gradient Shimming                                                                    |                             | <b>Date</b> | Jul 16 2013                   |         |
| <b>Date Stamp</b>             | Jul 16 2013 | <b>File Name</b>      | \\stl.umsl.edu\deptshare\sh_nmrdata\Agilent600\bashkin\ka2127f-proton-021513.fid\fid |                             |             |                               |         |
| <b>Frequency (MHz)</b>        | 599.78      | <b>Nucleus</b>        | 1H                                                                                   | <b>Number of Transients</b> | 32          | <b>Original Points Count</b>  | 16384   |
| <b>Points Count</b>           | 16384       | <b>Pulse Sequence</b> | s2pul                                                                                | <b>Receiver Gain</b>        | 30.00       | <b>Solvent</b>                | DMSO-d6 |
| <b>Spectrum Offset (Hz)</b>   | 3609.6973   | <b>Spectrum Type</b>  | STANDARD                                                                             | <b>Sweep Width (Hz)</b>     | 9615.38     | <b>Temperature (degree C)</b> | 25.000  |

$^1\text{H}$  NMR (600MHz, DMSO-d<sub>6</sub>)  $\delta$  = 10.30 (s, 1 H), 10.30 (s, 1 H), 9.94 (s, 1 H), 9.89 (s, 1 H), 9.82 (s, 1 H), 8.35 (br. s., 2 H), 8.09 (t,  $J$  = 5.6 Hz, 1 H), 8.06 (t,  $J$  = 5.9 Hz, 1 H), 8.02 (t,  $J$  = 5.6 Hz, 1 H), 7.95 (t,  $J$  = 5.6 Hz, 1 H), 7.58 (s, 1 H), 7.49 (s, 1 H), 7.46 (s, 1 H), 7.39 (d,  $J$  = 1.8 Hz, 1 H), 7.17 (s, 2 H), 7.15 (d,  $J$  = 1.8 Hz, 1 H), 7.11 (d,  $J$  = 1.8 Hz, 1 H), 7.08 (s, 1 H), 6.86 (s, 1 H), 6.83 (s, 1 H), 6.65 (d,  $J$  = 1.8 Hz, 1 H), 4.01 (s, 6 H), 3.93 (s, 3 H), 3.86 (s, 3 H), 3.81 (s, 3 H), 3.79 (s, 3 H), 3.78 (s, 3 H), 3.42 (td,  $J$  = 7.0, 12.9 Hz, 2 H), 3.39 - 3.32 (m,  $J$  = 1.0, 1.0, 1.0 Hz, 2 H), 3.31 - 3.23 (m,  $J$  = 1.0, 1.0, 1.0 Hz, 2 H), 3.06 (q,  $J$  = 6.5 Hz, 2 H), 2.81 (t,  $J$  = 7.0 Hz, 2 H), 2.53 - 2.46 (m, 2 H), 2.36 - 2.29 (m, 4 H), 2.29 - 2.22 (m, 4 H), 2.09 (s, 3 H), 1.83 - 1.74 (m, 2 H), 1.70 - 1.60 (m, 2 H), 1.52 (quin,  $J$  = 6.9 Hz, 2 H)

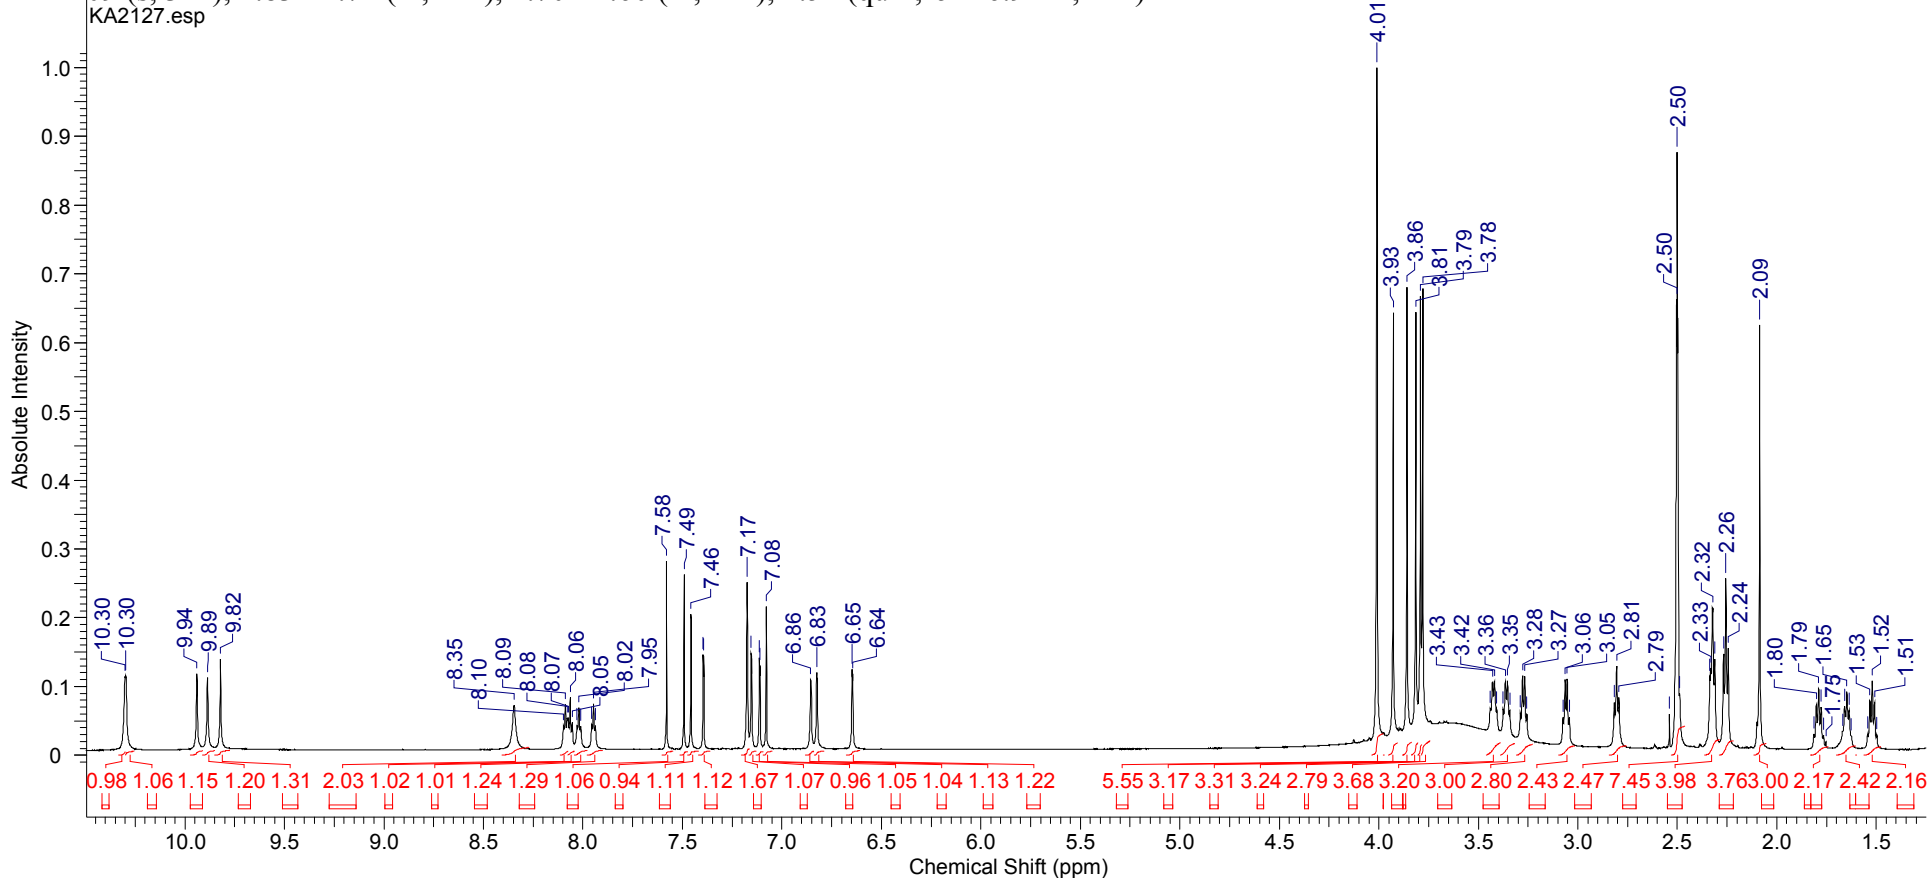

# KA2127

ka2127

|                               |                                                                                              |                               |         |                             |                        |                       |             |
|-------------------------------|----------------------------------------------------------------------------------------------|-------------------------------|---------|-----------------------------|------------------------|-----------------------|-------------|
| <b>Acquisition Time (sec)</b> | 0.8651                                                                                       | <b>Comment</b>                | ka2127f | <b>Date</b>                 | Jul 12 2013            | <b>Date Stamp</b>     | Jul 12 2013 |
| <b>File Name</b>              | \\stl.umsl.edu\deptshare\sh_nmrdata\Agilent600\bashkin\ka2127f_20130712_01\CARBON_01.fid\fid |                               |         |                             | <b>Frequency (MHz)</b> | 150.83                |             |
| <b>Nucleus</b>                | 13C                                                                                          | <b>Original Points Count</b>  | 32768   | <b>Points Count</b>         | 32768                  | <b>Pulse Sequence</b> | s2pul       |
| <b>Receiver Gain</b>          | 30.00                                                                                        | <b>Solvent</b>                | DMSO-d6 | <b>Spectrum Offset (Hz)</b> | 16123.4795             | <b>Spectrum Type</b>  | STANDARD    |
| <b>Sweep Width (Hz)</b>       | 37878.79                                                                                     | <b>Temperature (degree C)</b> | 25.000  |                             |                        |                       |             |

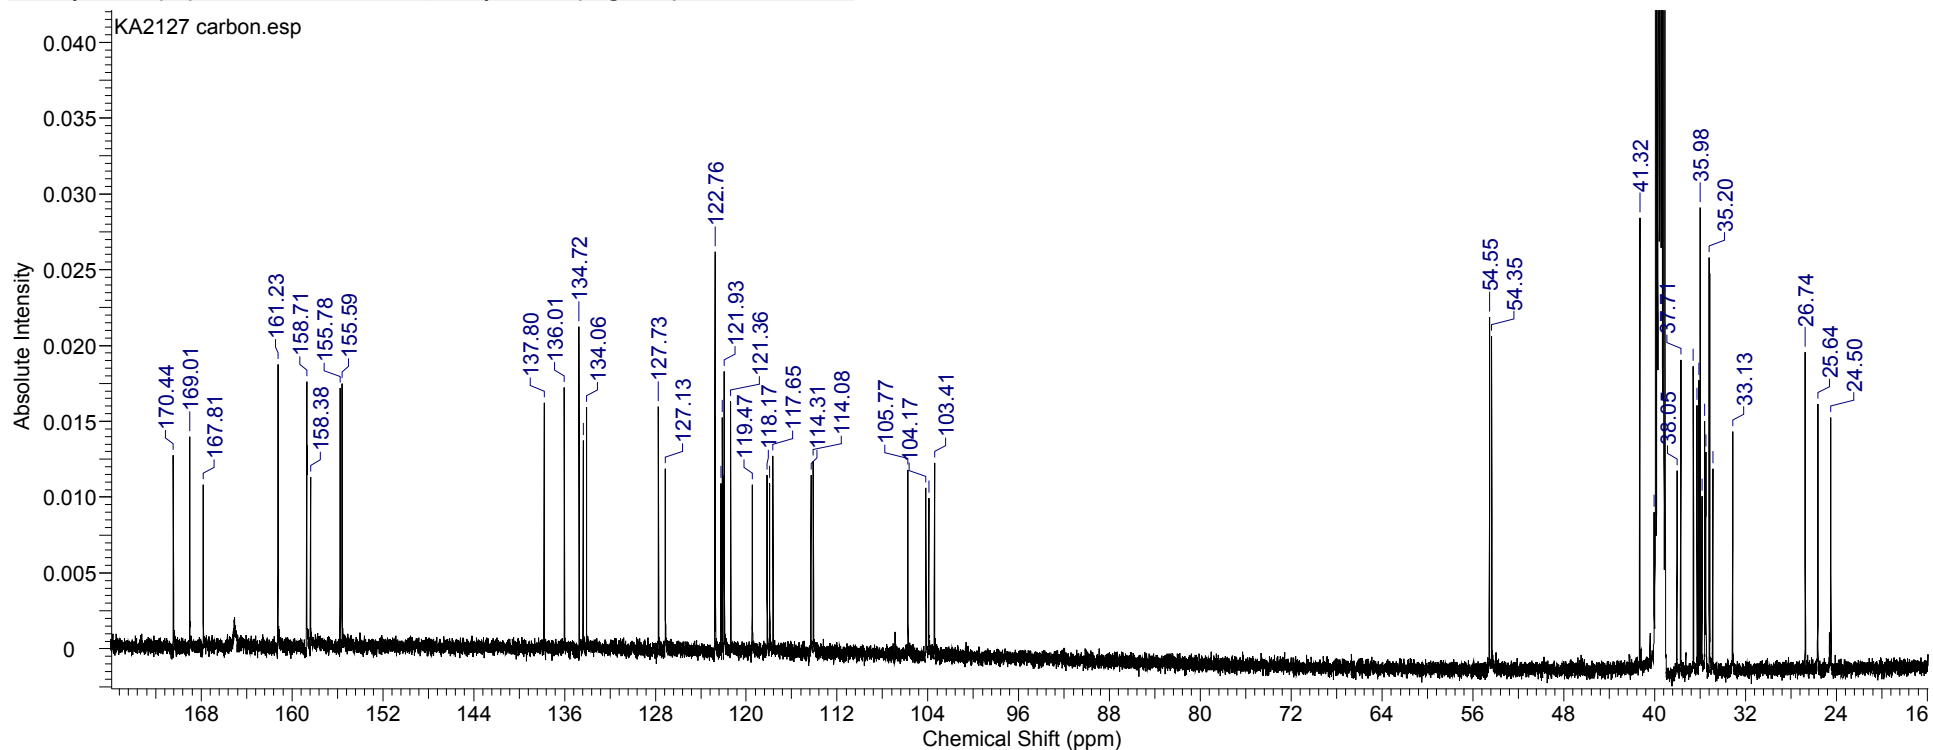

This report was created by ACD/NMR Processor Academic Edition. For more information go to [www.acdlabs.com/nmrproc/](http://www.acdlabs.com/nmrproc/)

| (ppm) | (Hz)    | (ppm) | (Hz)   | (ppm) | (Hz)   | (ppm) | (Hz)   |
|-------|---------|-------|---------|-------|---------|-------|---------|-------|---------|-------|--------|-------|--------|-------|--------|
| 170.4 | 25707.3 | 155.8 | 23495.9 | 127.7 | 19264.9 | 121.9 | 18391.0 | 114.1 | 17207.2 | 41.3  | 6232.1 | 36.0  | 5427.6 | 34.9  | 5263.4 |
| 169.0 | 25492.3 | 155.6 | 23468.2 | 127.1 | 19174.8 | 121.4 | 18304.3 | 105.8 | 15953.0 | 40.0  | 6040.2 | 35.8  | 5405.6 | 33.1  | 4997.5 |
| 167.8 | 25310.8 | 137.8 | 20785.1 | 122.8 | 18515.8 | 119.5 | 18019.9 | 104.2 | 15712.5 | 38.0  | 5738.5 | 35.6  | 5367.4 | 26.7  | 4033.4 |
| 161.2 | 24319.0 | 136.0 | 20514.6 | 122.7 | 18508.9 | 118.2 | 17823.4 | 103.9 | 15675.5 | 37.7  | 5687.7 | 35.5  | 5357.0 | 25.6  | 3866.9 |
| 158.7 | 23938.6 | 134.7 | 20319.2 | 122.2 | 18436.1 | 117.9 | 17787.5 | 103.4 | 15598.1 | 36.6  | 5520.0 | 35.5  | 5353.6 | 24.5  | 3694.7 |
| 158.7 | 23936.3 | 134.4 | 20266.0 | 122.1 | 18414.1 | 117.6 | 17744.8 | 54.6  | 8228.5  | 36.3  | 5470.3 | 35.2  | 5308.5 |       |        |
| 158.4 | 23887.8 | 134.1 | 20220.9 | 121.9 | 18393.3 | 114.3 | 17240.8 | 54.3  | 8197.3  | 36.1  | 5446.0 | 35.2  | 5302.7 |       |        |

# KA2128

KA2128

|                               |             |                       |                                                                                              |                             |             |                               |         |
|-------------------------------|-------------|-----------------------|----------------------------------------------------------------------------------------------|-----------------------------|-------------|-------------------------------|---------|
| <b>Acquisition Time (sec)</b> | 1.7039      | <b>Comment</b>        | Gradient Shimming                                                                            |                             | <b>Date</b> | Jul 17 2013                   |         |
| <b>Date Stamp</b>             | Jul 17 2013 | <b>File Name</b>      | \\stl.umsl.edu\deptshare\sh_nmrdata\Agilent600\bashkin\ka2128d_20130717_01\PROTON_01.fid\fid |                             |             |                               |         |
| <b>Frequency (MHz)</b>        | 599.78      | <b>Nucleus</b>        | 1H                                                                                           | <b>Number of Transients</b> | 8           | <b>Original Points Count</b>  | 16384   |
| <b>Points Count</b>           | 16384       | <b>Pulse Sequence</b> | s2pul                                                                                        | <b>Receiver Gain</b>        | 30.00       | <b>Solvent</b>                | DMSO-d6 |
| <b>Spectrum Offset (Hz)</b>   | 3609.6973   | <b>Spectrum Type</b>  | STANDARD                                                                                     | <b>Sweep Width (Hz)</b>     | 9615.38     | <b>Temperature (degree C)</b> | 25.000  |

$^1\text{H}$  NMR (600MHz, DMSO-d<sub>6</sub>)  $\delta$  = 10.38 (s, 1 H), 9.94 (s, 1 H), 9.89 (s, 1 H), 9.80 (s, 1 H), 8.35 (br. s., 2 H), 8.24 (t,  $J$  = 5.6 Hz, 1 H), 8.14 - 8.06 (m, 1 H), 8.06 - 8.00 (m, 1 H), 8.00 - 7.91 (m, 2 H), 7.52 (s, 1 H), 7.43 (s, 1 H), 7.41 (s, 1 H), 7.18 (s, 2 H), 7.10 (s, 1 H), 7.05 (s, 1 H), 6.86 (s, 1 H), 6.83 (s, 1 H), 6.64 (s, 1 H), 3.99 (s, 3 H), 3.96 (s, 3 H), 3.89 (s, 3 H), 3.82 (s, 3 H), 3.79 (s, 3 H), 3.77 (s, 3 H), 3.54 - 3.46 (m, 2 H), 3.46 - 3.39 (m,  $J$  = 5.9 Hz, 2 H), 3.39 - 3.32 (m, 2 H), 3.29 - 3.21 (m, 2 H), 3.06 (q,  $J$  = 6.5 Hz, 2 H), 2.81 (t,  $J$  = 6.7 Hz, 2 H), 2.59 (t,  $J$  = 6.7 Hz, 2 H), 2.56 - 2.47 (m, 2 H), 2.33 (t,  $J$  = 7.0 Hz, 4 H), 2.25 (td,  $J$  = 7.3, 14.2 Hz, 4 H), 2.09 (s, 3 H), 1.77 (quin,  $J$  = 6.9 Hz, 2 H), 1.72 - 1.61 (m, 2 H), 1.57 - 1.48 (m, 2 H)

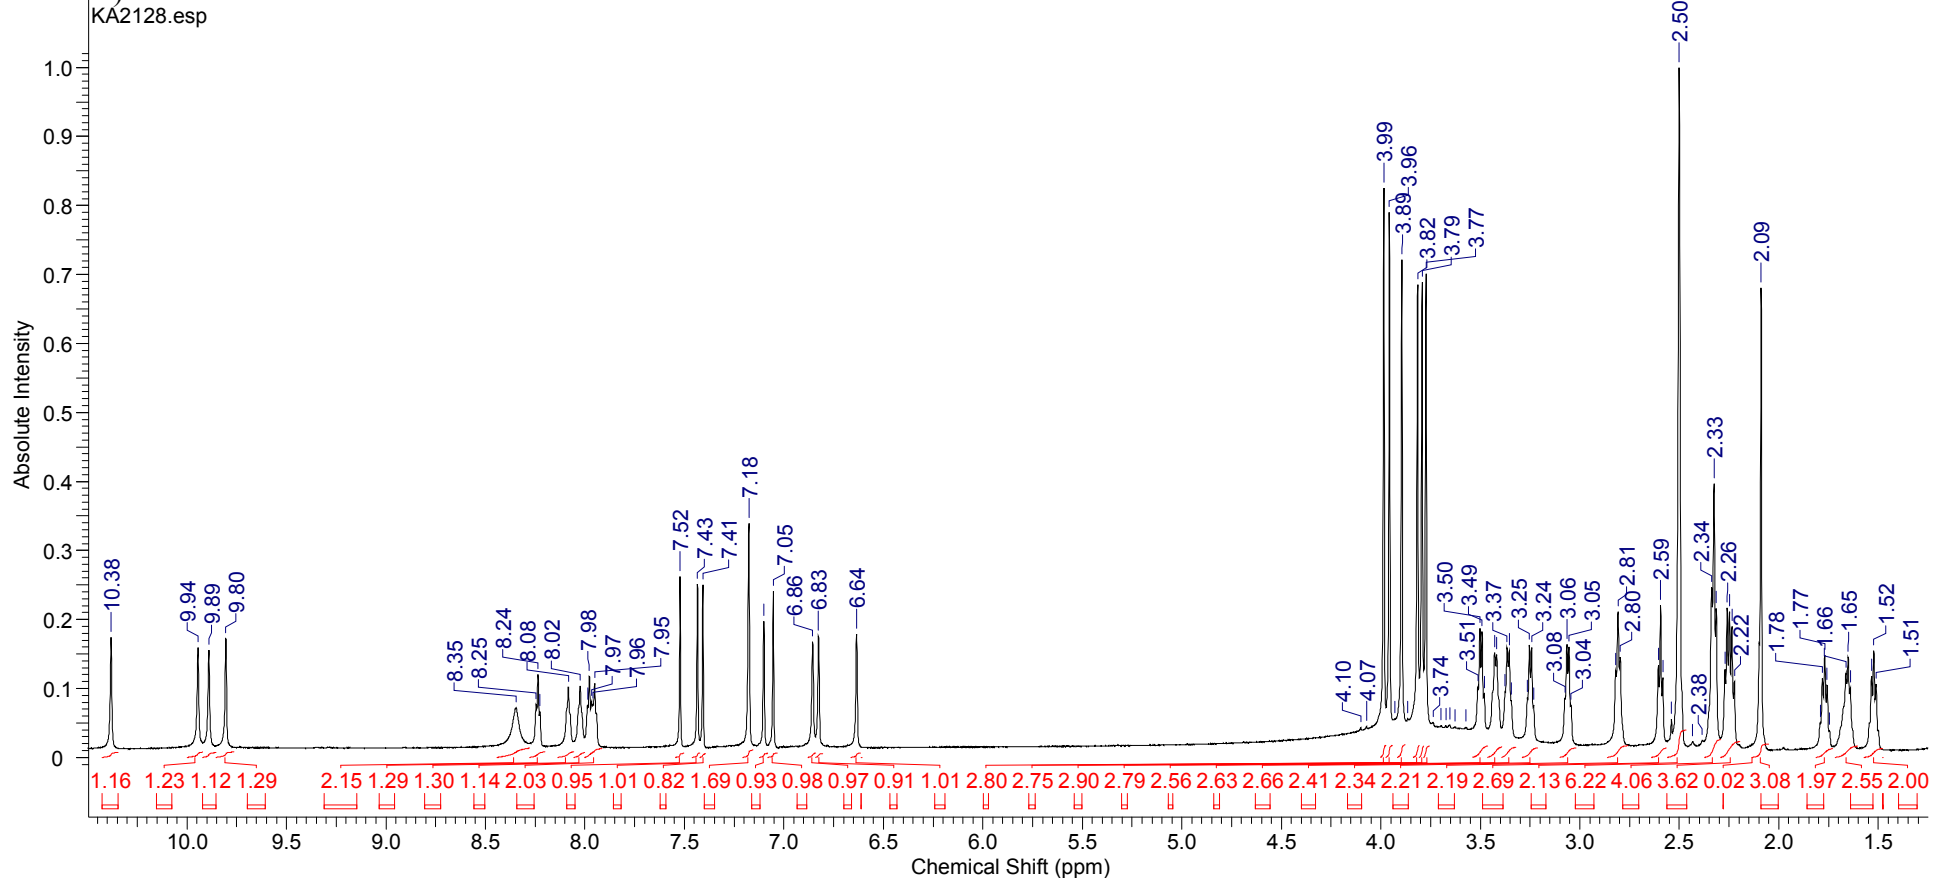

# KA2128

ka2128d

|                               |                                                                                              |                               |         |                             |             |                   |             |
|-------------------------------|----------------------------------------------------------------------------------------------|-------------------------------|---------|-----------------------------|-------------|-------------------|-------------|
| <b>Acquisition Time (sec)</b> | 0.8651                                                                                       | <b>Comment</b>                | ka2128d | <b>Date</b>                 | Jul 17 2013 | <b>Date Stamp</b> | Jul 17 2013 |
| <b>File Name</b>              | \\stl.umsl.edu\deptshare\sh_nmrdata\Agilent600\bashkin\ka2128d_20130717_01\CARBON_01.fid\fid |                               |         | <b>Frequency (MHz)</b>      | 150.83      |                   |             |
| <b>Nucleus</b>                | 13C                                                                                          | <b>Original Points Count</b>  | 32768   | <b>Points Count</b>         | 32768       |                   |             |
| <b>Receiver Gain</b>          | 30.00                                                                                        | <b>Solvent</b>                | DMSO-d6 | <b>Spectrum Offset (Hz)</b> | 16123.4795  |                   |             |
| <b>Sweep Width (Hz)</b>       | 37878.79                                                                                     | <b>Temperature (degree C)</b> | 25.000  |                             |             |                   |             |

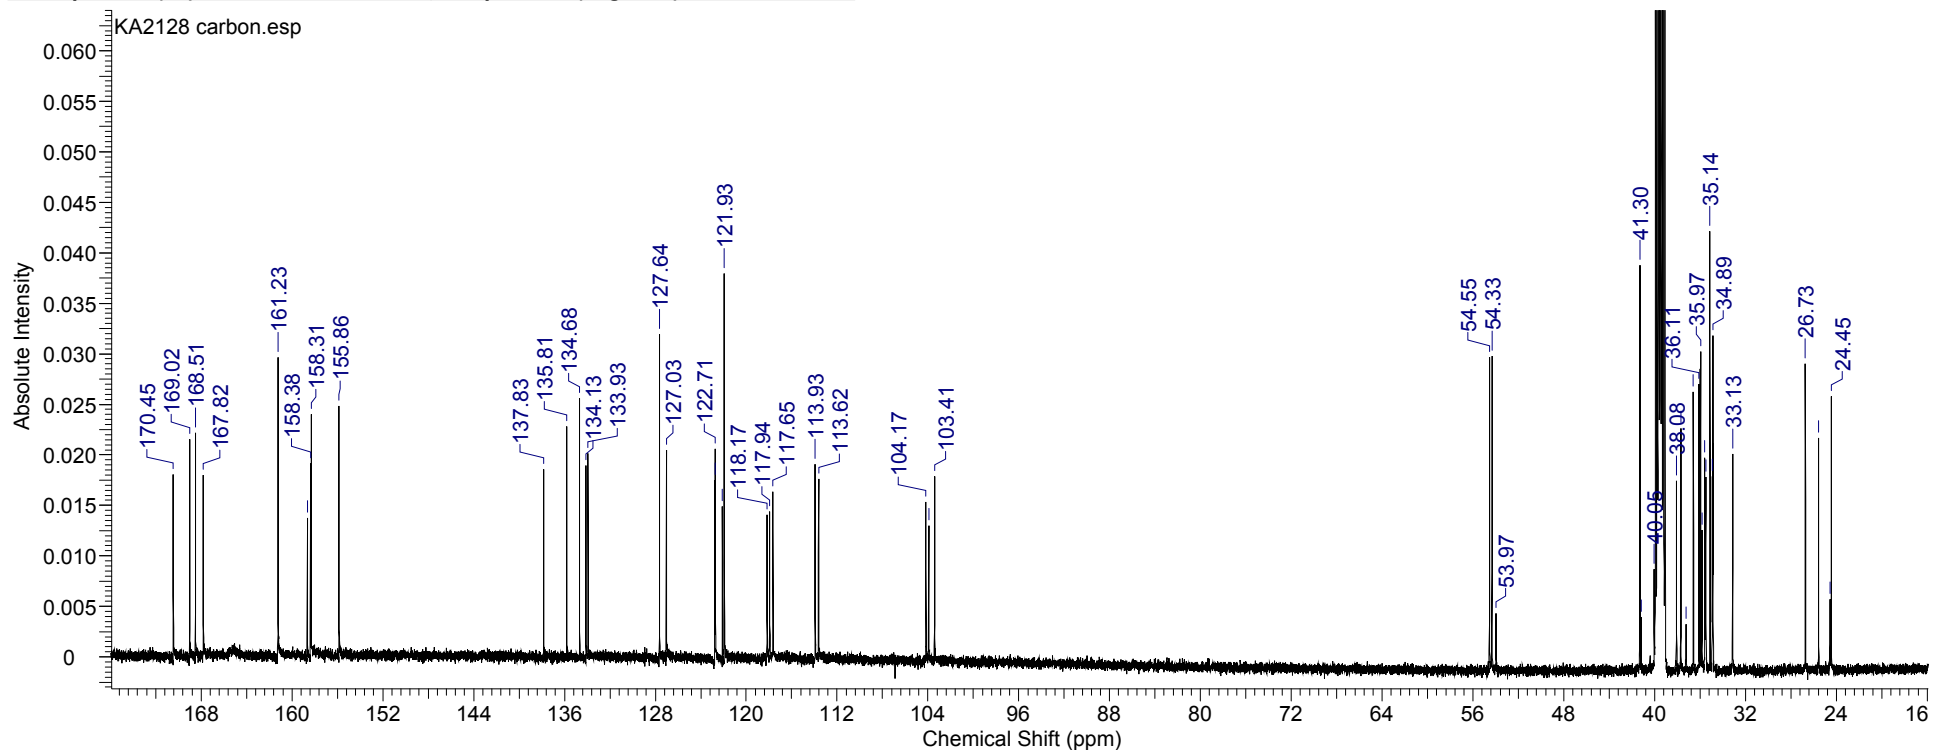

This report was created by ACD/NMR Processor Academic Edition. For more information go to [www.acdlabs.com/nmrproc/](http://www.acdlabs.com/nmrproc/)

|       |         |       |         |       |         |       |         |       |        |       |        |       |        |
|-------|---------|-------|---------|-------|---------|-------|---------|-------|--------|-------|--------|-------|--------|
| (ppm) | (Hz)    | (ppm) | (Hz)    | (ppm) | (Hz)    | (ppm) | (Hz)    | (ppm) | (Hz)   | (ppm) | (Hz)   | (ppm) | (Hz)   |
| 170.4 | 25708.5 | 155.9 | 23508.6 | 122.8 | 18514.7 | 113.6 | 17137.9 | 41.2  | 6212.5 | 36.0  | 5425.2 | 34.9  | 5262.2 |
| 169.0 | 25493.5 | 137.8 | 20789.7 | 122.7 | 18508.9 | 104.2 | 15712.5 | 40.0  | 6040.2 | 35.8  | 5405.6 | 34.9  | 5258.8 |
| 168.5 | 25416.0 | 135.8 | 20484.5 | 122.1 | 18414.1 | 103.9 | 15676.7 | 38.1  | 5743.1 | 35.6  | 5367.4 | 33.1  | 4997.5 |
| 167.8 | 25312.0 | 134.7 | 20313.4 | 121.9 | 18391.0 | 103.4 | 15596.9 | 37.7  | 5686.5 | 35.5  | 5357.0 | 26.7  | 4032.3 |
| 161.2 | 24319.0 | 134.1 | 20230.2 | 118.2 | 17823.4 | 54.5  | 8227.4  | 37.2  | 5617.1 | 35.5  | 5354.7 | 25.6  | 3856.5 |
| 158.7 | 23929.4 | 133.9 | 20200.1 | 117.9 | 17788.7 | 54.3  | 8195.0  | 36.6  | 5520.0 | 35.1  | 5300.4 | 24.6  | 3705.1 |
| 158.4 | 23887.8 | 127.6 | 19252.2 | 117.7 | 17745.9 | 54.0  | 8140.7  | 36.1  | 5446.0 | 35.1  | 5298.1 | 24.4  | 3687.8 |
| 158.3 | 23877.4 | 127.0 | 19159.7 | 113.9 | 17184.1 | 41.3  | 6229.8  | 36.0  | 5427.6 | 34.9  | 5268.0 |       |        |

# KA2129

KA2129

|                               |             |                       |                                                                                      |                             |             |                               |         |
|-------------------------------|-------------|-----------------------|--------------------------------------------------------------------------------------|-----------------------------|-------------|-------------------------------|---------|
| <b>Acquisition Time (sec)</b> | 1.7039      | <b>Comment</b>        | Gradient Shimming                                                                    |                             | <b>Date</b> | Jul 17 2013                   |         |
| <b>Date Stamp</b>             | Jul 17 2013 | <b>File Name</b>      | \\stl.umsl.edu\deptshare\sh_nmrdata\Agilent600\bashkin\ka2129d-protpn-071713.fid\fid |                             |             |                               |         |
| <b>Frequency (MHz)</b>        | 599.78      | <b>Nucleus</b>        | 1H                                                                                   | <b>Number of Transients</b> | 32          | <b>Original Points Count</b>  | 16384   |
| <b>Points Count</b>           | 16384       | <b>Pulse Sequence</b> | s2pul                                                                                | <b>Receiver Gain</b>        | 30.00       | <b>Solvent</b>                | DMSO-d6 |
| <b>Spectrum Offset (Hz)</b>   | 3609.6973   | <b>Spectrum Type</b>  | STANDARD                                                                             | <b>Sweep Width (Hz)</b>     | 9615.38     | <b>Temperature (degree C)</b> | 25.000  |

$^1\text{H}$  NMR (600MHz, DMSO-d<sub>6</sub>)  $\delta$  = 10.37 (s, 1 H), 9.87 (s, 1 H), 9.86 (s, 1 H), 9.83 (s, 1 H), 9.79 (br. s., 1 H), 8.23 (t,  $J$  = 6.2 Hz, 1 H), 8.15 (s, 1 H), 8.07 (t,  $J$  = 5.6 Hz, 1 H), 8.03 (t,  $J$  = 5.6 Hz, 1 H), 7.99 (t,  $J$  = 5.9 Hz, 2 H), 7.52 (s, 1 H), 7.43 (s, 1 H), 7.41 (s, 1 H), 7.18 (d,  $J$  = 1.2 Hz, 1 H), 7.14 (d,  $J$  = 1.2 Hz, 1 H), 7.12 (d,  $J$  = 1.8 Hz, 1 H), 7.05 (s, 1 H), 6.84 (d,  $J$  = 1.8 Hz, 1 H), 6.83 (d,  $J$  = 1.8 Hz, 1 H), 6.66 (d,  $J$  = 1.8 Hz, 1 H), 6.60 (br. s., 1 H), 3.98 (s, 3 H), 3.96 (s, 3 H), 3.90 (s, 3 H), 3.81 (s, 3 H), 3.79 (s, 3 H), 3.77 (s, 3 H), 3.53 - 3.47 (m, 2 H), 3.45 - 3.40 (m, 2 H), 3.40 - 3.32 (m, 2 H), 3.29 - 3.23 (m, 2 H), 3.12 - 3.04 (m, 2 H), 2.88 - 2.82 (m, 2 H), 2.76 - 2.67 (m, 2 H), 2.67 - 2.62 (m, 2 H), 2.60 (t,  $J$  = 6.7 Hz, 2 H), 2.50 - 2.47 (m, 2 H), 2.41 (br. s., 3 H), 2.32 (t,  $J$  = 7.0 Hz, 2 H), 2.26 (t,  $J$  = 7.3 Hz, 2 H), 1.83 - 1.74 (m, 4 H), 1.68 - 1.59 (m, 2 H)

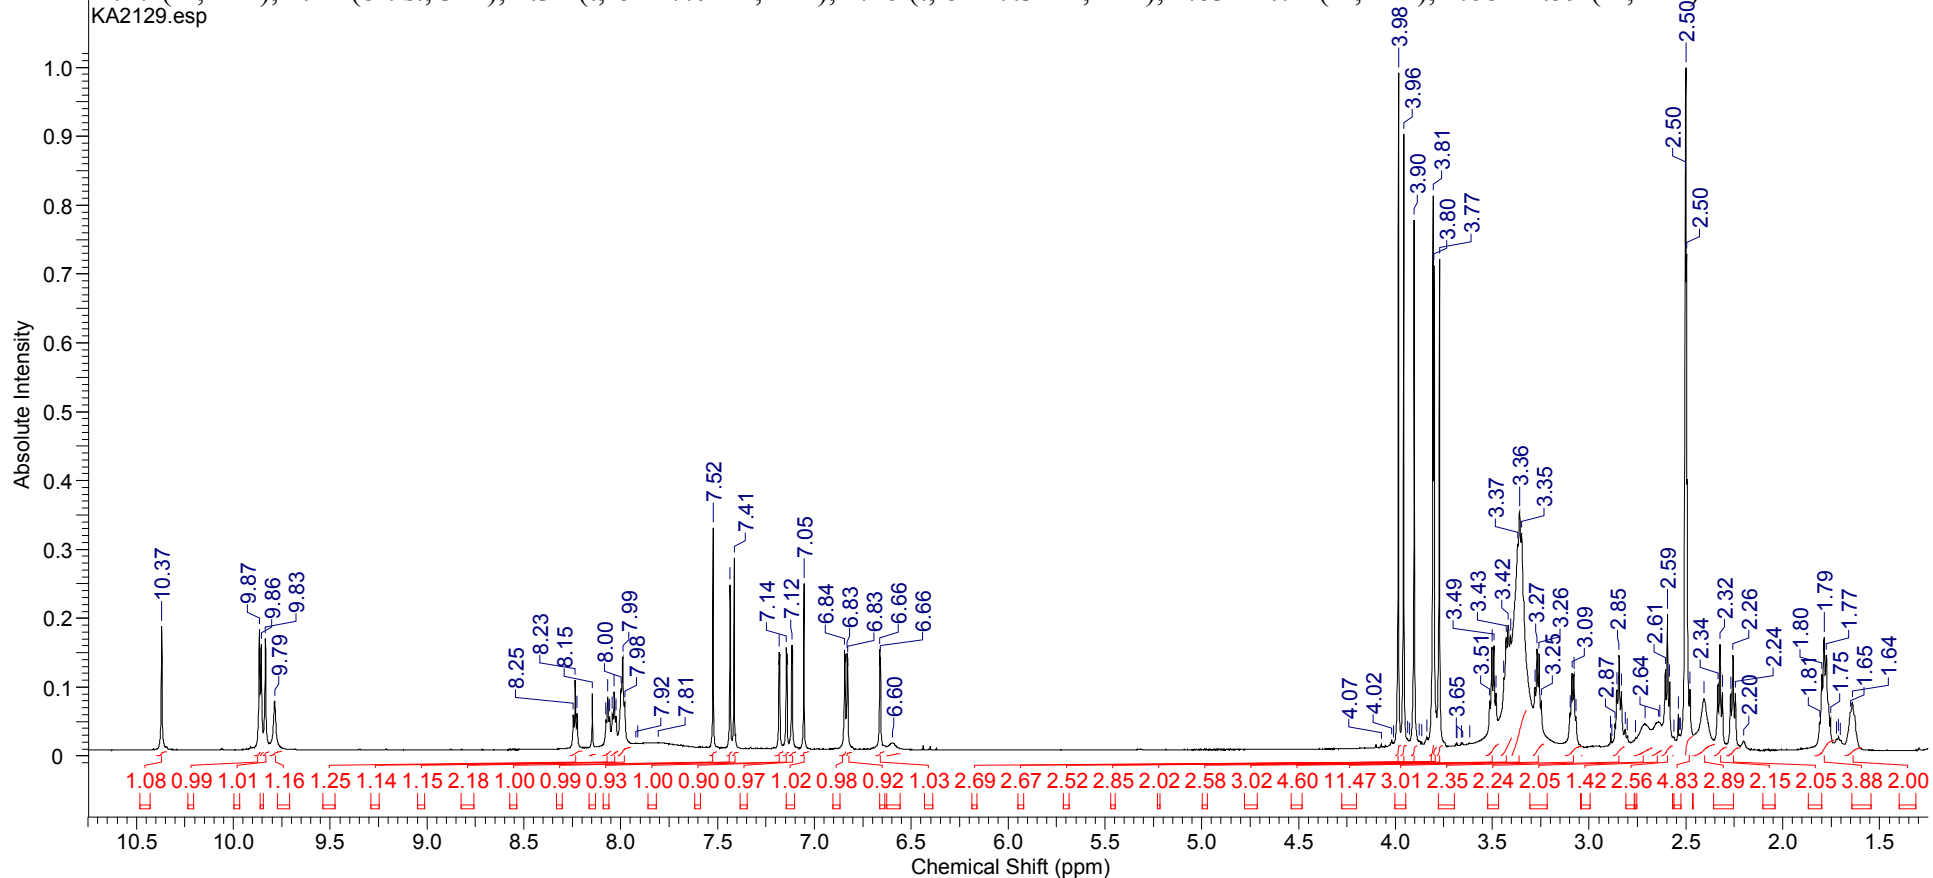



# KA2129

ka2129

|                               |                                                                                              |                               |         |                             |             |                      |             |
|-------------------------------|----------------------------------------------------------------------------------------------|-------------------------------|---------|-----------------------------|-------------|----------------------|-------------|
| <b>Acquisition Time (sec)</b> | 0.8651                                                                                       | <b>Comment</b>                | ka2129d | <b>Date</b>                 | Jul 16 2013 | <b>Date Stamp</b>    | Jul 16 2013 |
| <b>File Name</b>              | \\stl.umsl.edu\deptshare\sh_nmrdata\Agilent600\bashkin\ka2129d_20130716_01\CARBON_01.fid\fid |                               |         | <b>Frequency (MHz)</b>      | 150.83      |                      |             |
| <b>Nucleus</b>                | 13C                                                                                          | <b>Original Points Count</b>  | 32768   | <b>Points Count</b>         | 32768       |                      |             |
| <b>Receiver Gain</b>          | 30.00                                                                                        | <b>Solvent</b>                | DMSO-d6 | <b>Spectrum Offset (Hz)</b> | 16123.4795  | <b>Spectrum Type</b> | STANDARD    |
| <b>Sweep Width (Hz)</b>       | 37878.79                                                                                     | <b>Temperature (degree C)</b> | 25.000  |                             |             |                      |             |

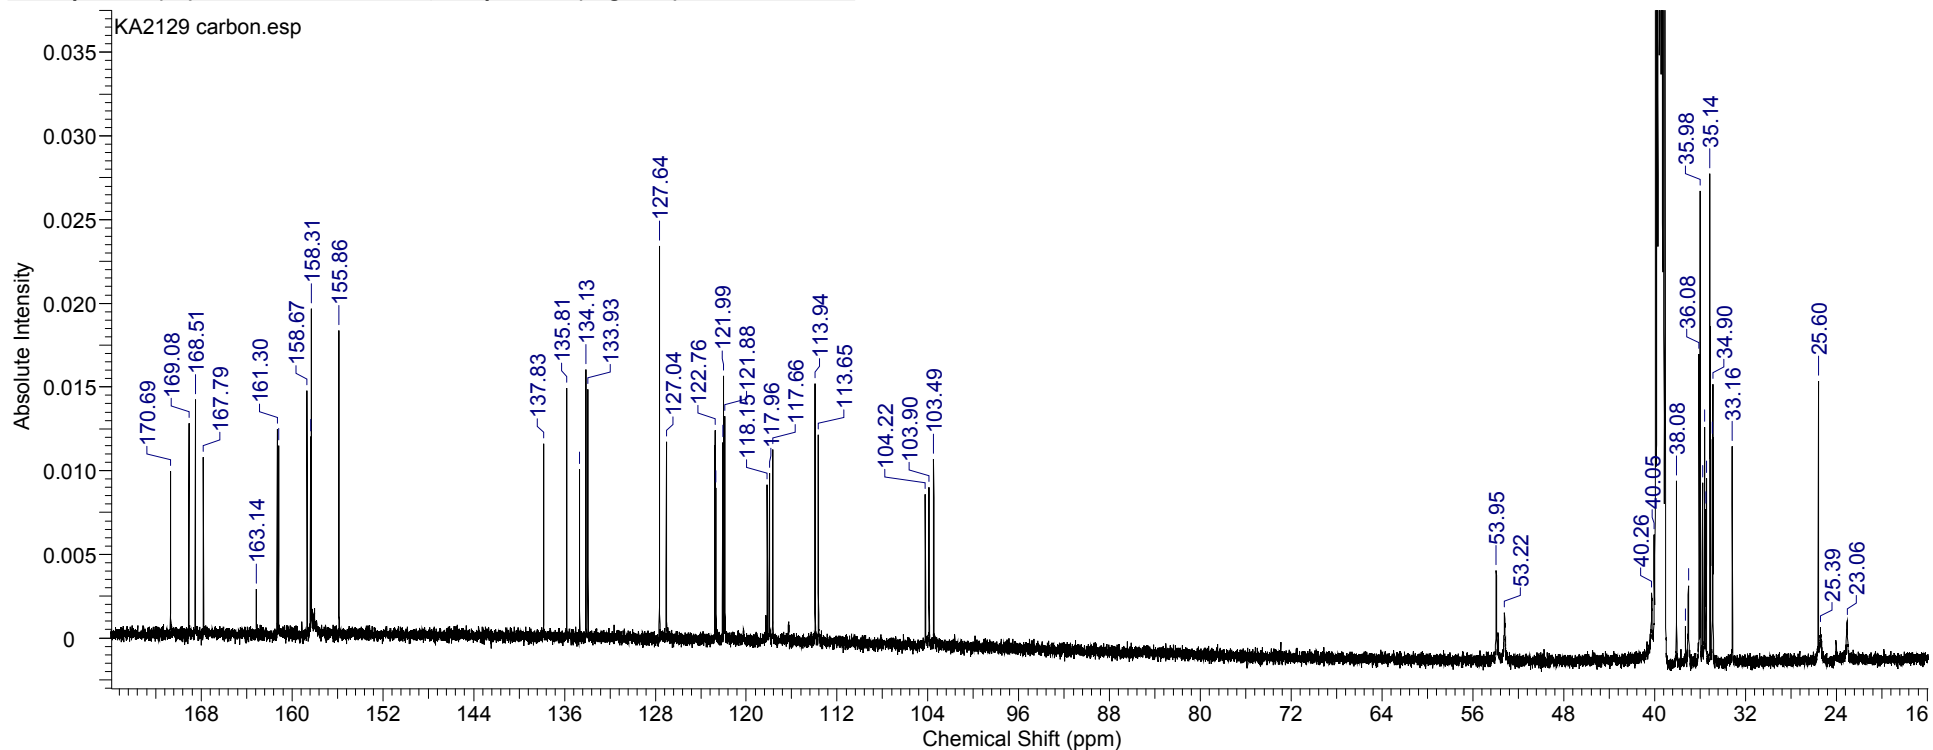

**This report was created by ACD/NMR Processor Academic Edition. For more information go to [www.acdlabs.com/nmrproc/](http://www.acdlabs.com/nmrproc/)**

| (ppm) | (Hz)    | (ppm) | (Hz)   | (ppm) | (Hz)   | (ppm) | (Hz)   |
|-------|---------|-------|---------|-------|---------|-------|---------|-------|---------|-------|--------|-------|--------|-------|--------|
| 170.7 | 25745.5 | 158.7 | 23931.7 | 134.1 | 20230.2 | 122.1 | 18412.9 | 113.6 | 17141.3 | 40.0  | 6040.2 | 35.6  | 5373.2 | 34.9  | 5258.8 |
| 169.1 | 25502.7 | 158.4 | 23887.8 | 133.9 | 20201.3 | 122.0 | 18399.1 | 104.2 | 15719.5 | 38.1  | 5743.1 | 35.5  | 5354.7 | 33.2  | 5002.1 |
| 168.5 | 25417.2 | 158.3 | 23877.4 | 127.6 | 19252.2 | 121.9 | 18382.9 | 103.9 | 15670.9 | 37.3  | 5625.2 | 35.5  | 5347.8 | 25.6  | 3861.2 |
| 167.8 | 25308.5 | 155.9 | 23508.6 | 127.0 | 19160.9 | 118.1 | 17819.9 | 103.5 | 15609.6 | 37.0  | 5585.9 | 35.1  | 5300.4 | 25.4  | 3830.0 |
| 163.1 | 24606.8 | 137.8 | 20789.7 | 122.8 | 18519.3 | 118.0 | 17792.2 | 53.9  | 8137.2  | 36.1  | 5442.6 | 35.1  | 5296.9 | 23.1  | 3478.5 |
| 161.3 | 24329.4 | 135.8 | 20484.5 | 122.8 | 18515.8 | 117.7 | 17747.1 | 53.2  | 8027.4  | 36.0  | 5427.6 | 34.9  | 5268.0 |       |        |
| 161.2 | 24312.0 | 134.7 | 20313.4 | 122.7 | 18502.0 | 113.9 | 17185.3 | 40.3  | 6072.6  | 35.8  | 5399.8 | 34.9  | 5263.4 |       |        |

# KJK6021

4/1/2014 5:10:37 PM  
Gradient Shimming

|                               |             |                       |                                                                                          |                             |             |                               |         |
|-------------------------------|-------------|-----------------------|------------------------------------------------------------------------------------------|-----------------------------|-------------|-------------------------------|---------|
| <b>Acquisition Time (sec)</b> | 1.7039      | <b>Comment</b>        | Gradient Shimming                                                                        |                             | <b>Date</b> | Oct 28 2013                   |         |
| <b>Date Stamp</b>             | Oct 28 2013 | <b>File Name</b>      | \\stl.umsl.edu\deptshare\sh_nmrdata\Agilent600\bashkin\kjk621f11-proton_10282013.fid\fid |                             |             |                               |         |
| <b>Frequency (MHz)</b>        | 599.78      | <b>Nucleus</b>        | 1H                                                                                       | <b>Number of Transients</b> | 32          | <b>Original Points Count</b>  | 16384   |
| <b>Points Count</b>           | 16384       | <b>Pulse Sequence</b> | s2pul                                                                                    | <b>Receiver Gain</b>        | 42.00       | <b>Solvent</b>                | DMSO-d6 |
| <b>Spectrum Offset (Hz)</b>   | 3608.5234   | <b>Spectrum Type</b>  | STANDARD                                                                                 | <b>Sweep Width (Hz)</b>     | 9615.38     | <b>Temperature (degree C)</b> | 23.000  |

$^1\text{H}$  NMR (600MHz, DMSO-d<sub>6</sub>)  $\delta$  = 10.31 (s, 1 H), 10.29 (s, 1 H), 9.96 (s, 1 H), 9.94 (s, 1 H), 9.93 (s, 1 H), 9.91 (s, 1 H), 8.41 (s, 2 H), 8.07 (t,  $J$  = 6.2 Hz, 1 H), 8.04 (t,  $J$  = 5.6 Hz, 1 H), 7.98 (t,  $J$  = 5.6 Hz, 1 H), 7.57 (s, 1 H), 7.50 (s, 1 H), 7.45 (s, 1 H), 7.39 (d,  $J$  = 1.8 Hz, 1 H), 7.23 (s, 2 H), 7.19 (d,  $J$  = 1.2 Hz, 1 H), 7.17 (d,  $J$  = 1.2 Hz, 1 H), 7.16 (d,  $J$  = 1.8 Hz, 1 H), 7.07 (s, 1 H), 7.06 (d,  $J$  = 1.2 Hz, 1 H), 7.05 (s, 1 H), 6.89 (s, 1 H), 6.85 (d,  $J$  = 1.2 Hz, 1 H), 4.01 (s, 3 H), 3.94 (s, 3 H), 3.86 (s, 3 H), 3.85 (s, 3 H), 3.84 (s, 3 H), 3.83 (s, 3 H), 3.81 - 3.79 (m, 3 H), 3.40 - 3.33 (m, 2 H), 3.32 - 3.26 (m, 2 H), 3.06 (q,  $J$  = 6.5 Hz, 2 H), 2.78 (t,  $J$  = 6.7 Hz, 2 H), 2.37 - 2.21 (m, 8 H), 2.08 (s, 3 H), 1.81 (td,  $J$  = 7.1, 14.5 Hz, 2 H), 1.66 (td,  $J$  = 7.1, 14.5 Hz, 2 H), 1.52 (td,  $J$  = 7.0, 13.6 Hz, 2 H)

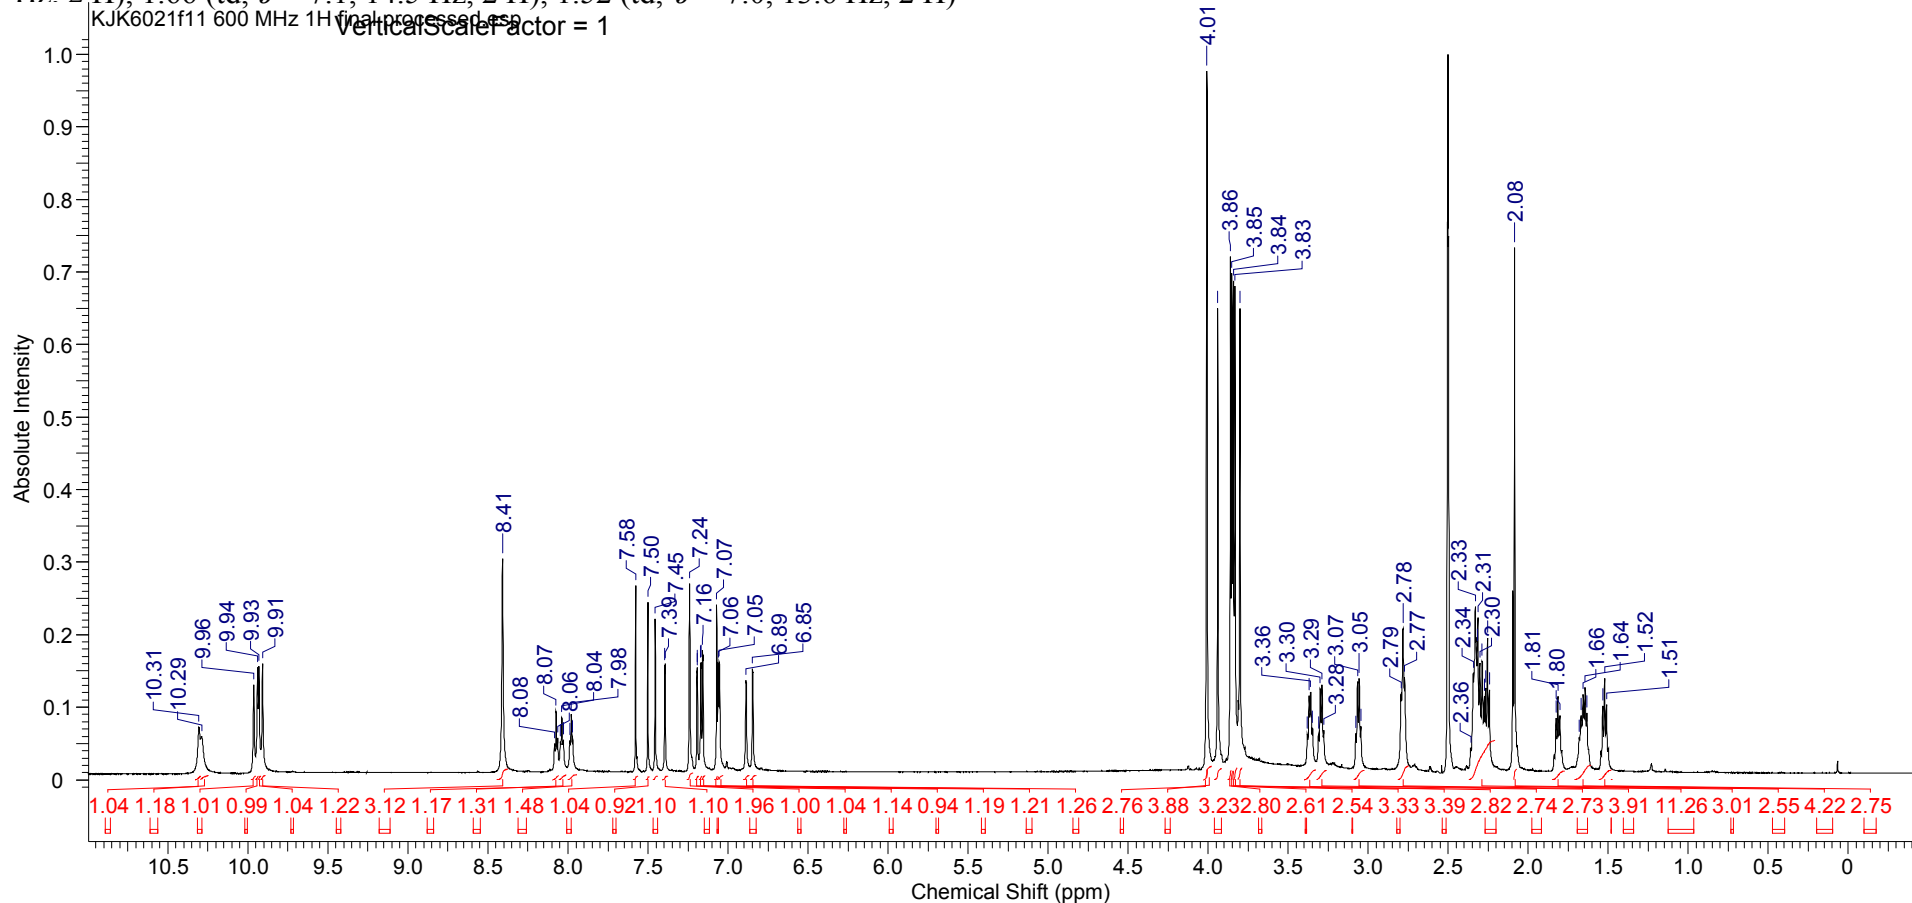

# KJK6021

4/1/2014 5:15:33 PM

|                               |                                                                                                   |                               |           |                             |            |                   |            |
|-------------------------------|---------------------------------------------------------------------------------------------------|-------------------------------|-----------|-----------------------------|------------|-------------------|------------|
| <b>Acquisition Time (sec)</b> | 0.8651                                                                                            | <b>Comment</b>                | kjk6053tq | <b>Date</b>                 | Feb 6 2014 | <b>Date Stamp</b> | Feb 6 2014 |
| <b>File Name</b>              | \\stl.umsi.edu\steamboat\k\koellerk\My Documents\NMR fids\kjk6053tq_20140206_01\CARBON_01.fid\fid |                               |           | <b>Frequency (MHz)</b>      | 150.83     |                   |            |
| <b>Nucleus</b>                | 13C                                                                                               | <b>Original Points Count</b>  | 32768     | <b>Points Count</b>         | 32768      |                   |            |
| <b>Receiver Gain</b>          | 30.00                                                                                             | <b>Solvent</b>                | DMSO-d6   | <b>Spectrum Offset (Hz)</b> | 16117.6992 |                   |            |
| <b>Sweep Width (Hz)</b>       | 37878.79                                                                                          | <b>Temperature (degree C)</b> | 23.000    |                             |            |                   |            |

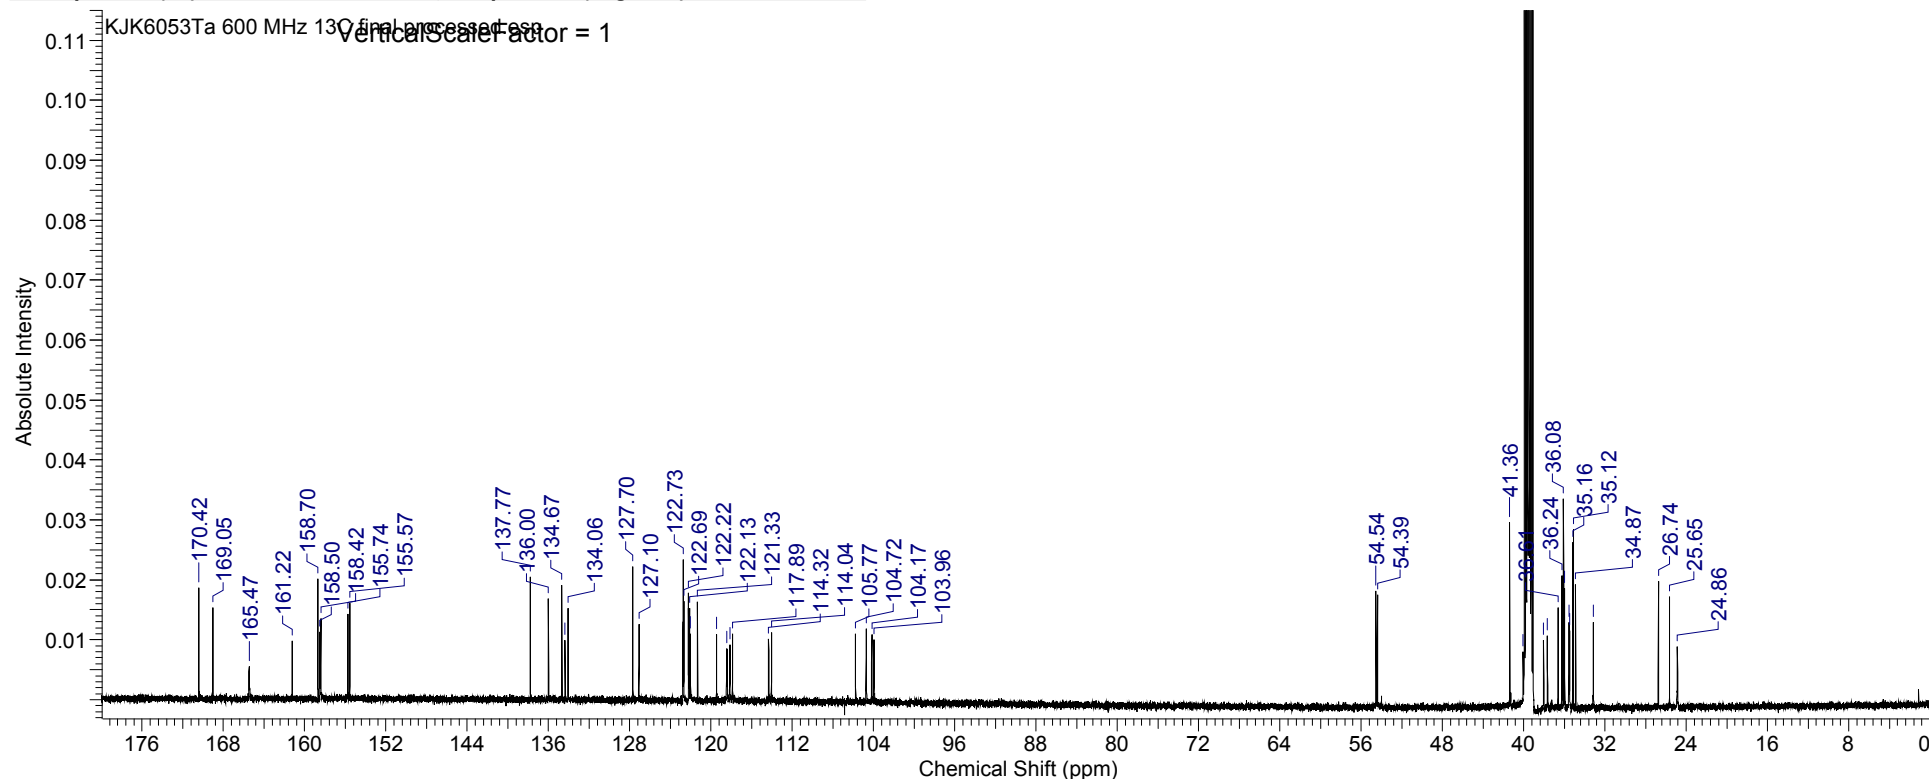

| (ppm) | (Hz)    | (ppm) | (Hz)   | (ppm) | (Hz)   |
|-------|---------|-------|---------|-------|---------|-------|---------|-------|---------|-------|--------|-------|--------|
| 170.4 | 25703.9 | 158.4 | 23894.7 | 127.7 | 19261.5 | 122.1 | 18421.0 | 114.3 | 17243.1 | 41.4  | 6239.1 | 36.0  | 5422.9 |
| 169.1 | 25498.1 | 155.7 | 23490.1 | 127.1 | 19170.1 | 122.0 | 18403.7 | 114.0 | 17201.5 | 40.0  | 6040.2 | 35.5  | 5361.7 |
| 165.5 | 24958.2 | 155.6 | 23464.7 | 122.8 | 18515.8 | 121.3 | 18299.7 | 105.8 | 15953.0 | 38.0  | 5736.2 | 35.5  | 5351.3 |
| 161.2 | 24316.7 | 137.8 | 20780.4 | 122.7 | 18511.2 | 119.5 | 18017.6 | 104.7 | 15794.6 | 37.7  | 5679.6 | 35.2  | 5303.9 |
| 158.7 | 23937.5 | 136.0 | 20512.3 | 122.7 | 18505.4 | 118.5 | 17868.5 | 104.2 | 15712.5 | 36.6  | 5522.3 | 35.1  | 5296.9 |
| 158.7 | 23935.2 | 134.7 | 20312.3 | 122.2 | 18434.9 | 118.4 | 17859.2 | 104.0 | 15680.2 | 36.2  | 5465.7 | 34.9  | 5259.9 |
| 158.5 | 23906.3 | 134.4 | 20264.9 | 122.2 | 18431.4 | 118.1 | 17819.9 | 54.5  | 8226.2  | 36.1  | 5442.6 | 33.1  | 4998.7 |
| 158.5 | 23900.5 | 134.1 | 20220.9 | 122.2 | 18426.8 | 117.9 | 17781.8 | 54.4  | 8204.3  | 36.1  | 5440.3 | 26.7  | 4033.4 |

# KJK6053Dp

2/20/2014 5:20:38 PM  
kjk6053dp

|                               |                                                                                        |                             |           |                               |             |                   |             |
|-------------------------------|----------------------------------------------------------------------------------------|-----------------------------|-----------|-------------------------------|-------------|-------------------|-------------|
| <b>Acquisition Time (sec)</b> | 1.7039                                                                                 | <b>Comment</b>              | kjk6053dp | <b>Date</b>                   | Jan 30 2014 | <b>Date Stamp</b> | Jan 30 2014 |
| <b>File Name</b>              | \\stl.umsl.edu\deptshare\sh_nmrdata\Agilent600\bashkin\kjk6053-proton_01302014.fid\fid |                             |           | <b>Frequency (MHz)</b>        | 599.78      |                   |             |
| <b>Nucleus</b>                | 1H                                                                                     | <b>Number of Transients</b> | 16        | <b>Original Points Count</b>  | 16384       |                   |             |
| <b>Pulse Sequence</b>         | s2pul                                                                                  | <b>Receiver Gain</b>        | 30.00     | <b>Solvent</b>                | DMSO-d6     |                   |             |
| <b>Spectrum Type</b>          | STANDARD                                                                               | <b>Sweep Width (Hz)</b>     | 9615.38   | <b>Temperature (degree C)</b> | 23.000      |                   |             |

$^1\text{H}$  NMR (600MHz, DMSO-d<sub>6</sub>)  $\delta$  = 10.30 (s, 1 H), 10.28 (s, 1 H), 9.95 (s, 1 H), 9.93 (s, 1 H), 9.91 (s, 1 H), 9.88 (s, 1 H), 8.33 (s, 2 H), 8.07 (t,  $J$  = 5.6 Hz, 1 H), 8.01 (t,  $J$  = 5.0 Hz, 1 H), 7.91 (t,  $J$  = 5.0 Hz, 1 H), 7.58 (s, 1 H), 7.50 (s, 1 H), 7.45 (s, 1 H), 7.39 (s, 1 H), 7.24 (s, 2 H), 7.20 (s, 1 H), 7.17 (s, 1 H), 7.15 (s, 1 H), 7.07 (s, 1 H), 7.06 (s, 1 H), 7.05 (s, 1 H), 6.89 (s, 1 H), 6.83 (s, 1 H), 4.02 (s, 3 H), 4.01 (s, 3 H), 3.94 (s, 3 H), 3.86 (s, 3 H), 3.85 (s, 3 H), 3.84 (s, 3 H), 3.83 (s, 3 H), 3.80 (s, 3 H), 3.36 (q,  $J$  = 6.0 Hz, 2 H), 3.29 (q,  $J$  = 6.5 Hz, 2 H), 3.06 (q,  $J$  = 6.5 Hz, 2 H), 2.83 - 2.75 (m, 2 H), 2.35 - 2.23 (m, 6 H), 2.15 (s, 3 H), 1.85 - 1.77 (m, 2 H), 1.70 - 1.62 (m, 2 H), 1.54 (td,  $J$  = 6.8, 13.9 Hz, 2 H), 1.23 (s, 2 H)

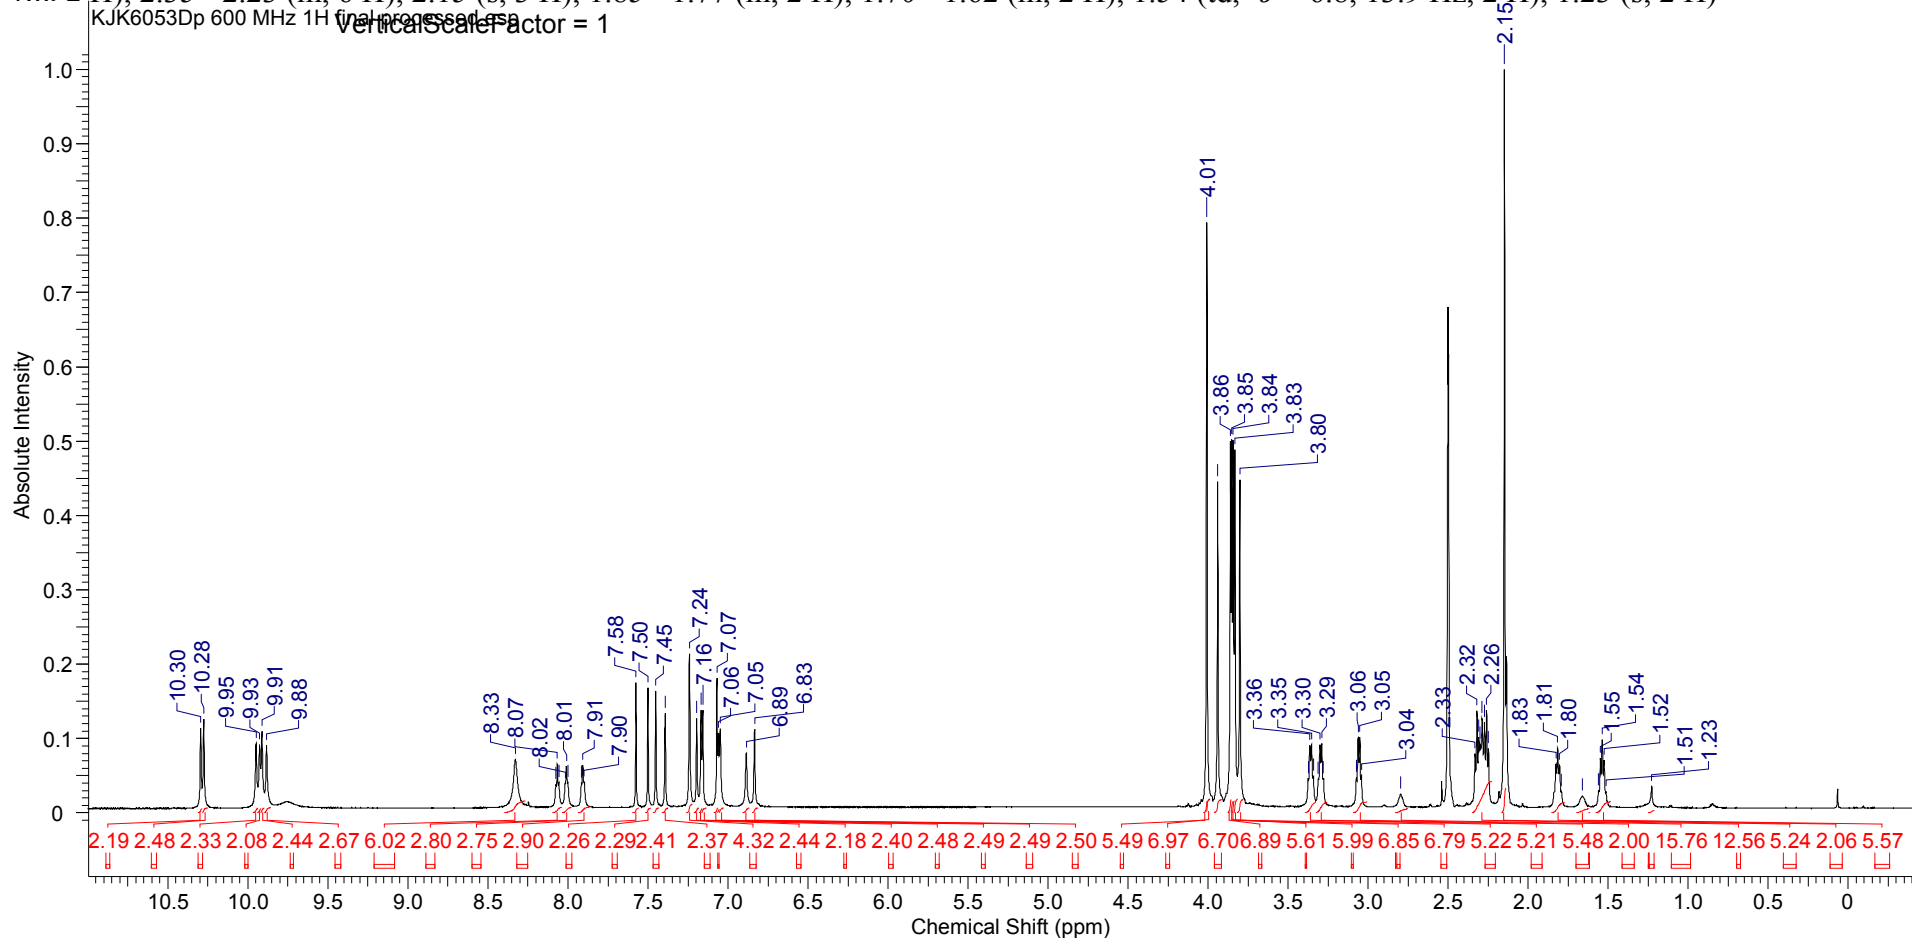

# KJK6053Dp

2/28/2014 12:12:04 PM  
kjk6053dp

|                               |                                                                                                   |                             |           |                               |             |                   |             |
|-------------------------------|---------------------------------------------------------------------------------------------------|-----------------------------|-----------|-------------------------------|-------------|-------------------|-------------|
| <b>Acquisition Time (sec)</b> | 0.8651                                                                                            | <b>Comment</b>              | kjk6053dp | <b>Date</b>                   | Jan 29 2014 | <b>Date Stamp</b> | Jan 29 2014 |
| <b>File Name</b>              | \\stl.umsl.edu\steamboat\k\koellerk\My Documents\NMR fids\kjk6053dp_20140129_01\CARBON_01.fid\fid |                             |           | <b>Frequency (MHz)</b>        | 150.83      |                   |             |
| <b>Nucleus</b>                | 13C                                                                                               | <b>Number of Transients</b> | 35000     | <b>Original Points Count</b>  | 32768       |                   |             |
| <b>Pulse Sequence</b>         | s2pul                                                                                             | <b>Receiver Gain</b>        | 30.00     | <b>Solvent</b>                | DMSO-d6     |                   |             |
| <b>Spectrum Type</b>          | STANDARD                                                                                          | <b>Sweep Width (Hz)</b>     | 37878.79  | <b>Temperature (degree C)</b> | 23.000      |                   |             |

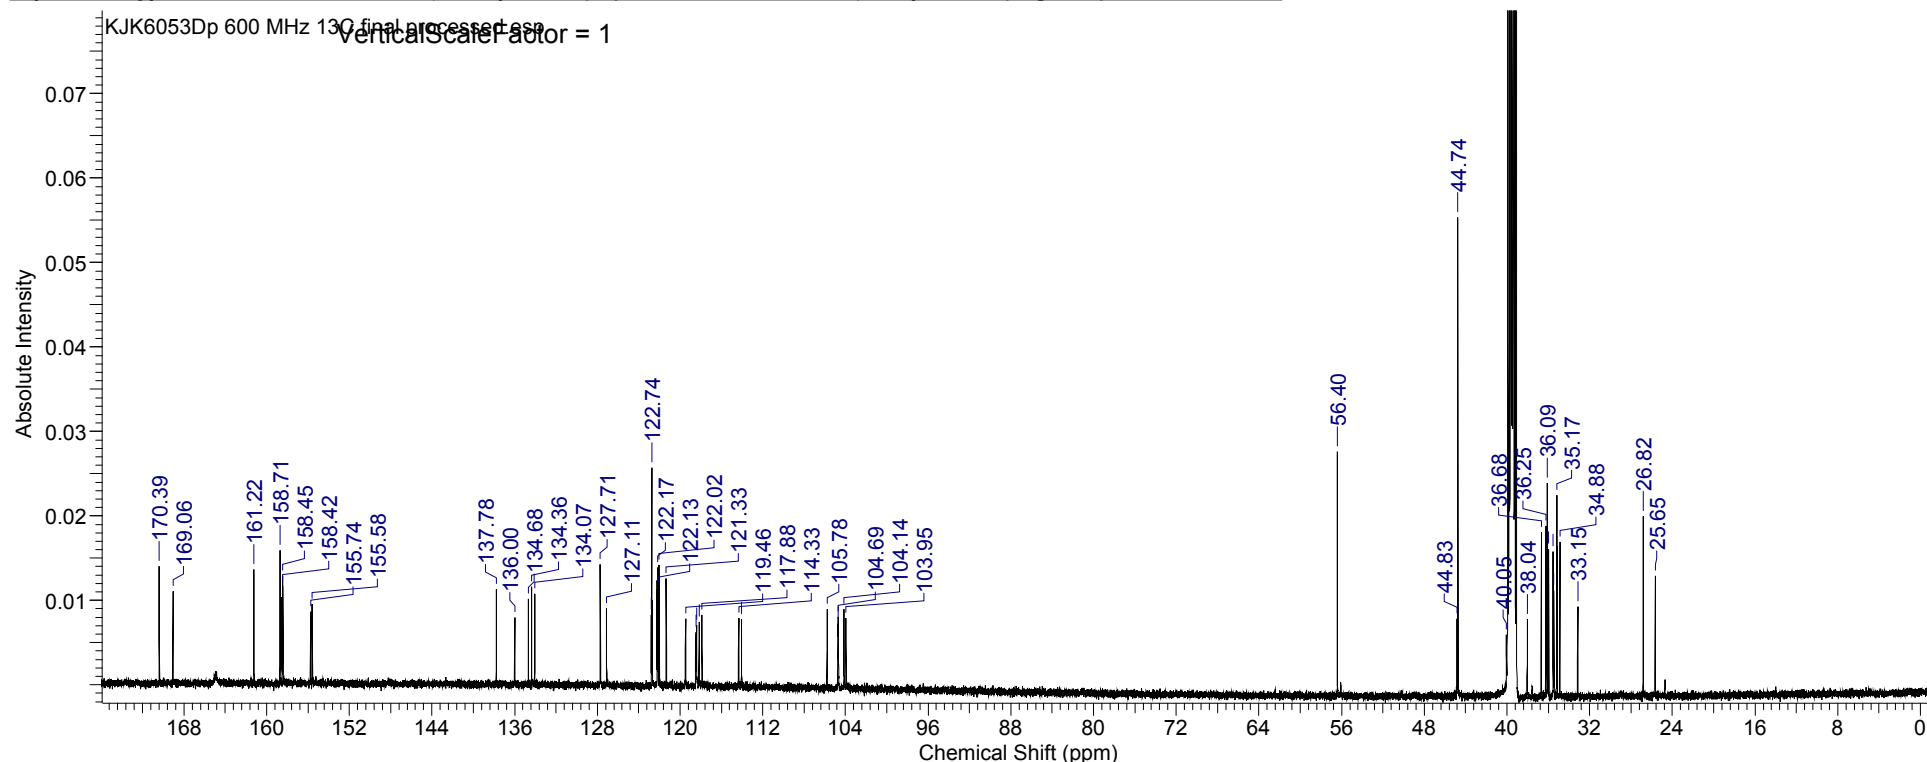

| (ppm) | (Hz)    | (ppm) | (Hz)   |
|-------|---------|-------|---------|-------|---------|-------|---------|-------|---------|-------|--------|
| 170.4 | 25699.2 | 155.7 | 23490.1 | 127.1 | 19171.3 | 122.0 | 18403.7 | 114.1 | 17202.6 | 44.7  | 6748.8 |
| 169.1 | 25499.2 | 155.6 | 23465.8 | 122.8 | 18518.1 | 121.3 | 18300.8 | 105.8 | 15954.1 | 40.0  | 6040.2 |
| 161.2 | 24316.6 | 137.8 | 20781.6 | 122.7 | 18512.3 | 119.5 | 18018.7 | 104.7 | 15794.6 | 38.0  | 5737.3 |
| 158.7 | 23938.6 | 136.0 | 20512.2 | 122.7 | 18505.4 | 118.5 | 17869.6 | 104.7 | 15791.1 | 36.7  | 5532.7 |
| 158.7 | 23936.3 | 134.7 | 20313.4 | 122.2 | 18436.0 | 118.4 | 17859.2 | 104.1 | 15707.9 | 36.2  | 5466.8 |
| 158.5 | 23906.2 | 134.4 | 20264.8 | 122.2 | 18431.4 | 118.2 | 17821.0 | 104.0 | 15679.0 | 36.1  | 5443.7 |
| 158.5 | 23899.3 | 134.1 | 20222.1 | 122.2 | 18426.8 | 117.9 | 17779.4 | 56.4  | 8507.1  | 36.0  | 5422.9 |
| 158.4 | 23894.7 | 127.7 | 19262.6 | 122.1 | 18421.0 | 114.3 | 17244.2 | 44.8  | 6761.6  | 35.5  | 5359.3 |

# KJK6064

3/6/2014 4:02:36 PM  
Gradient Shimming

|                               |            |                       |                                                                                |                             |             |                                      |
|-------------------------------|------------|-----------------------|--------------------------------------------------------------------------------|-----------------------------|-------------|--------------------------------------|
| <b>Acquisition Time (sec)</b> | 1.7039     | <b>Comment</b>        | Gradient Shimming                                                              |                             | <b>Date</b> | Mar 6 2014                           |
| <b>Date Stamp</b>             | Mar 6 2014 | <b>File Name</b>      | \\stf1.umsl.edu\deptshare\sh_nmrdata\Agilent600\bashkin\kjk6064-proton.fid\fid |                             |             |                                      |
| <b>Frequency (MHz)</b>        | 599.78     | <b>Nucleus</b>        | 1H                                                                             | <b>Number of Transients</b> | 16          | <b>Original Points Count</b> 16384   |
| <b>Points Count</b>           | 16384      | <b>Pulse Sequence</b> | s2pul                                                                          | <b>Receiver Gain</b>        | 42.00       | <b>Solvent</b> DMSO-d6               |
| <b>Spectrum Offset (Hz)</b>   | 3608.5234  | <b>Spectrum Type</b>  | STANDARD                                                                       | <b>Sweep Width (Hz)</b>     | 9615.38     | <b>Temperature (degree C)</b> 23.000 |

$^1\text{H}$  NMR (600MHz, DMSO-d<sub>6</sub>)  $\delta$  = 10.28 (s, 1 H), 10.26 (s, 1 H), 9.93 (s, 1 H), 9.91 (s, 1 H), 9.89 (s, 1 H), 9.85 (s, 1 H), 9.82 (s, 1 H), 9.67 (br. s., 1 H), 8.10 (t,  $J$  = 5.9 Hz, 1 H), 8.08 - 8.02 (m, 2 H), 7.95 (br. s., 1 H), 7.89 (br. s., 3 H), 7.58 (s, 1 H), 7.50 (s, 1 H), 7.47 (s, 1 H), 7.39 (d,  $J$  = 1.8 Hz, 1 H), 7.23 (d,  $J$  = 1.2 Hz, 1 H), 7.22 (d,  $J$  = 1.8 Hz, 1 H), 7.17 (d,  $J$  = 1.8 Hz, 1 H), 7.16 (d,  $J$  = 1.2 Hz, 2 H), 7.10 (s, 1 H), 7.07 (s, 2 H), 6.90 - 6.87 (m, 2 H), 4.01 (s, 6 H), 3.94 (s, 3 H), 3.86 (s, 3 H), 3.85 (s, 3 H), 3.84 (s, 3 H), 3.83 (s, 3 H), 3.80 (s, 3 H), 3.42 - 3.35 (m, 2 H), 3.30 (q,  $J$  = 6.5 Hz, 2 H), 3.22 - 3.16 (m, 2 H), 3.16 - 3.10 (m, 2 H), 3.10 - 2.98 (m, 2 H), 2.91 - 2.83 (m, 2 H), 2.74 (d,  $J$  = 4.7 Hz, 3 H), 2.36 (t,  $J$  = 7.3 Hz, 2 H), 2.29 (t,  $J$  = 7.3 Hz, 2 H), 1.97 - 1.88 (m, 2 H), 1.86 - 1.74 (m, 4 H)

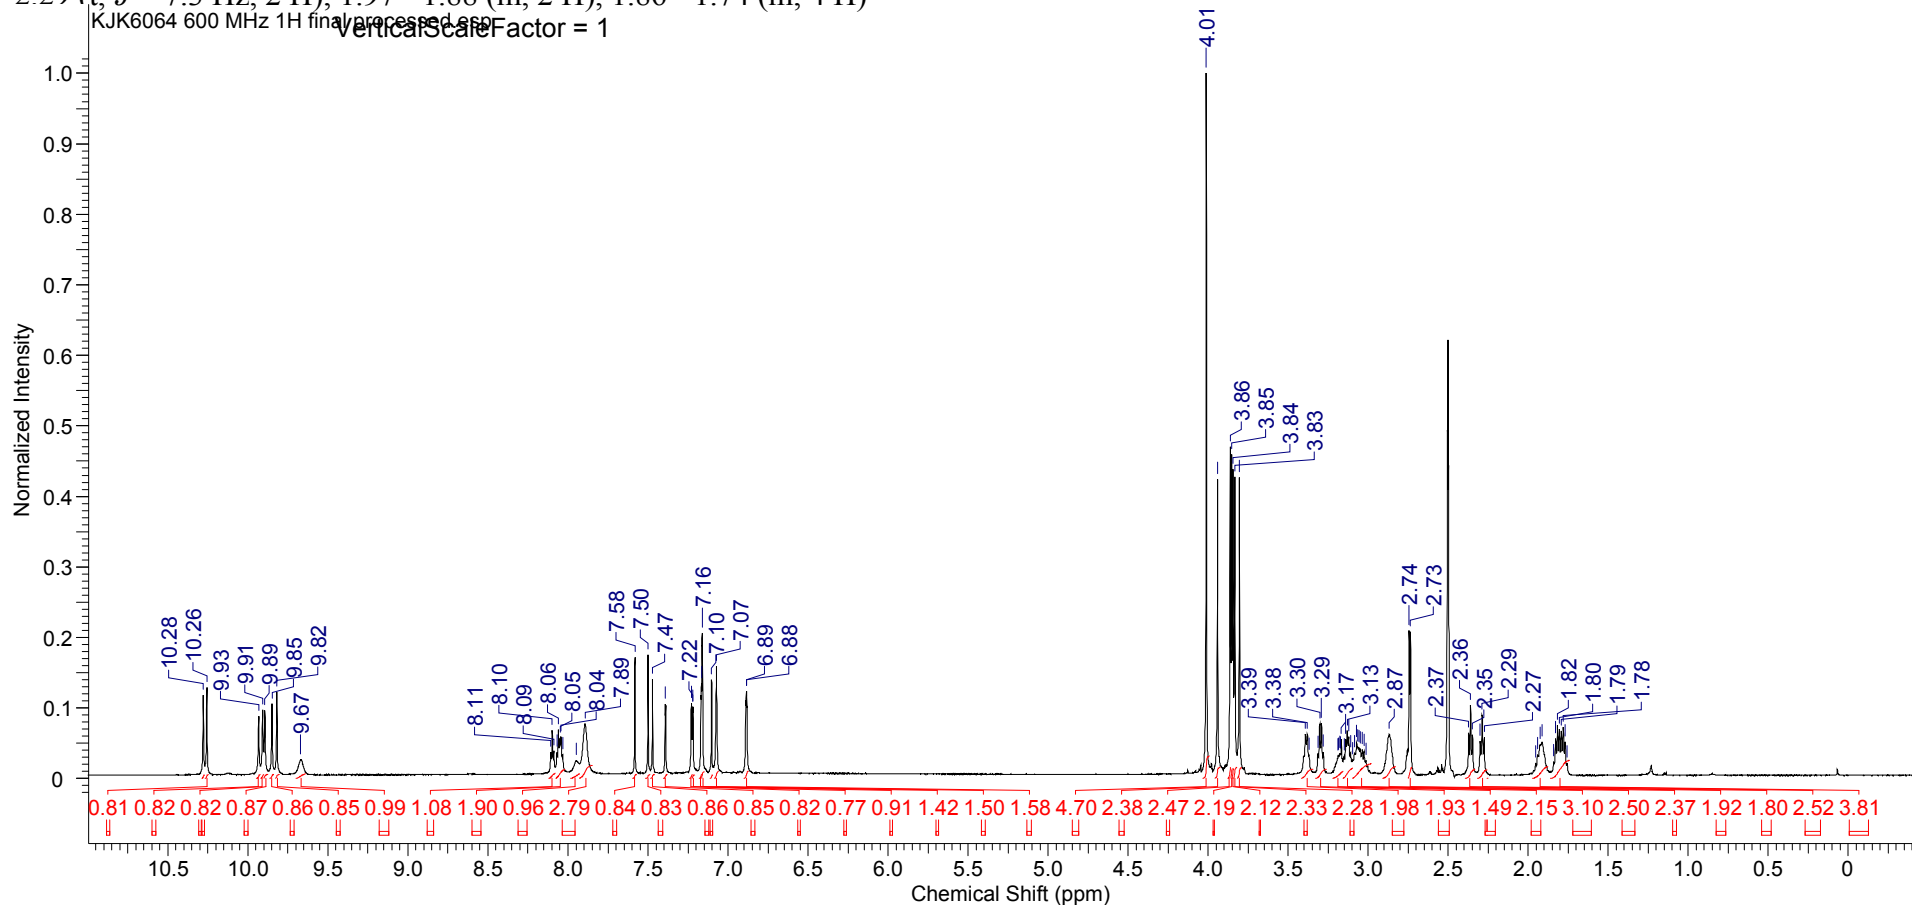

# KA1071D

3/25/2014 5:20:51 PM  
ka1071d

|                               |                                                                                              |                             |         |                               |             |                   |             |
|-------------------------------|----------------------------------------------------------------------------------------------|-----------------------------|---------|-------------------------------|-------------|-------------------|-------------|
| <b>Acquisition Time (sec)</b> | 1.7039                                                                                       | <b>Comment</b>              | ka1071d | <b>Date</b>                   | Mar 17 2014 | <b>Date Stamp</b> | Mar 17 2014 |
| <b>File Name</b>              | \\stl.umsl.edu\deptshare\sh_nmrdata\Agilent600\bashkin\ka1071d_20140317_01\PROTON_01.fid\fid |                             |         | <b>Frequency (MHz)</b>        | 599.78      |                   |             |
| <b>Nucleus</b>                | 1H                                                                                           | <b>Number of Transients</b> | 32      | <b>Original Points Count</b>  | 16384       |                   |             |
| <b>Pulse Sequence</b>         | s2pul                                                                                        | <b>Receiver Gain</b>        | 30.00   | <b>Solvent</b>                | DMSO-d6     |                   |             |
| <b>Spectrum Type</b>          | STANDARD                                                                                     | <b>Sweep Width (Hz)</b>     | 9615.38 | <b>Temperature (degree C)</b> | 23.000      |                   |             |
|                               |                                                                                              |                             |         | <b>Spectrum Offset (Hz)</b>   | 3610.2842   |                   |             |

<sup>1</sup>H NMR (600MHz, DMSO-d<sub>6</sub>)  $\delta$  = 12.17 (br. s., 1 H), 9.03 (s, 1 H), 7.97 (t,  $J$  = 5.3 Hz, 1 H), 6.82 (s, 1 H), 6.61 (s, 1 H), 3.75 (s, 3 H), 3.36 - 3.31 (m, 2 H), 2.45 (t,  $J$  = 7.3 Hz, 2 H), 1.44 (s, 9 H)

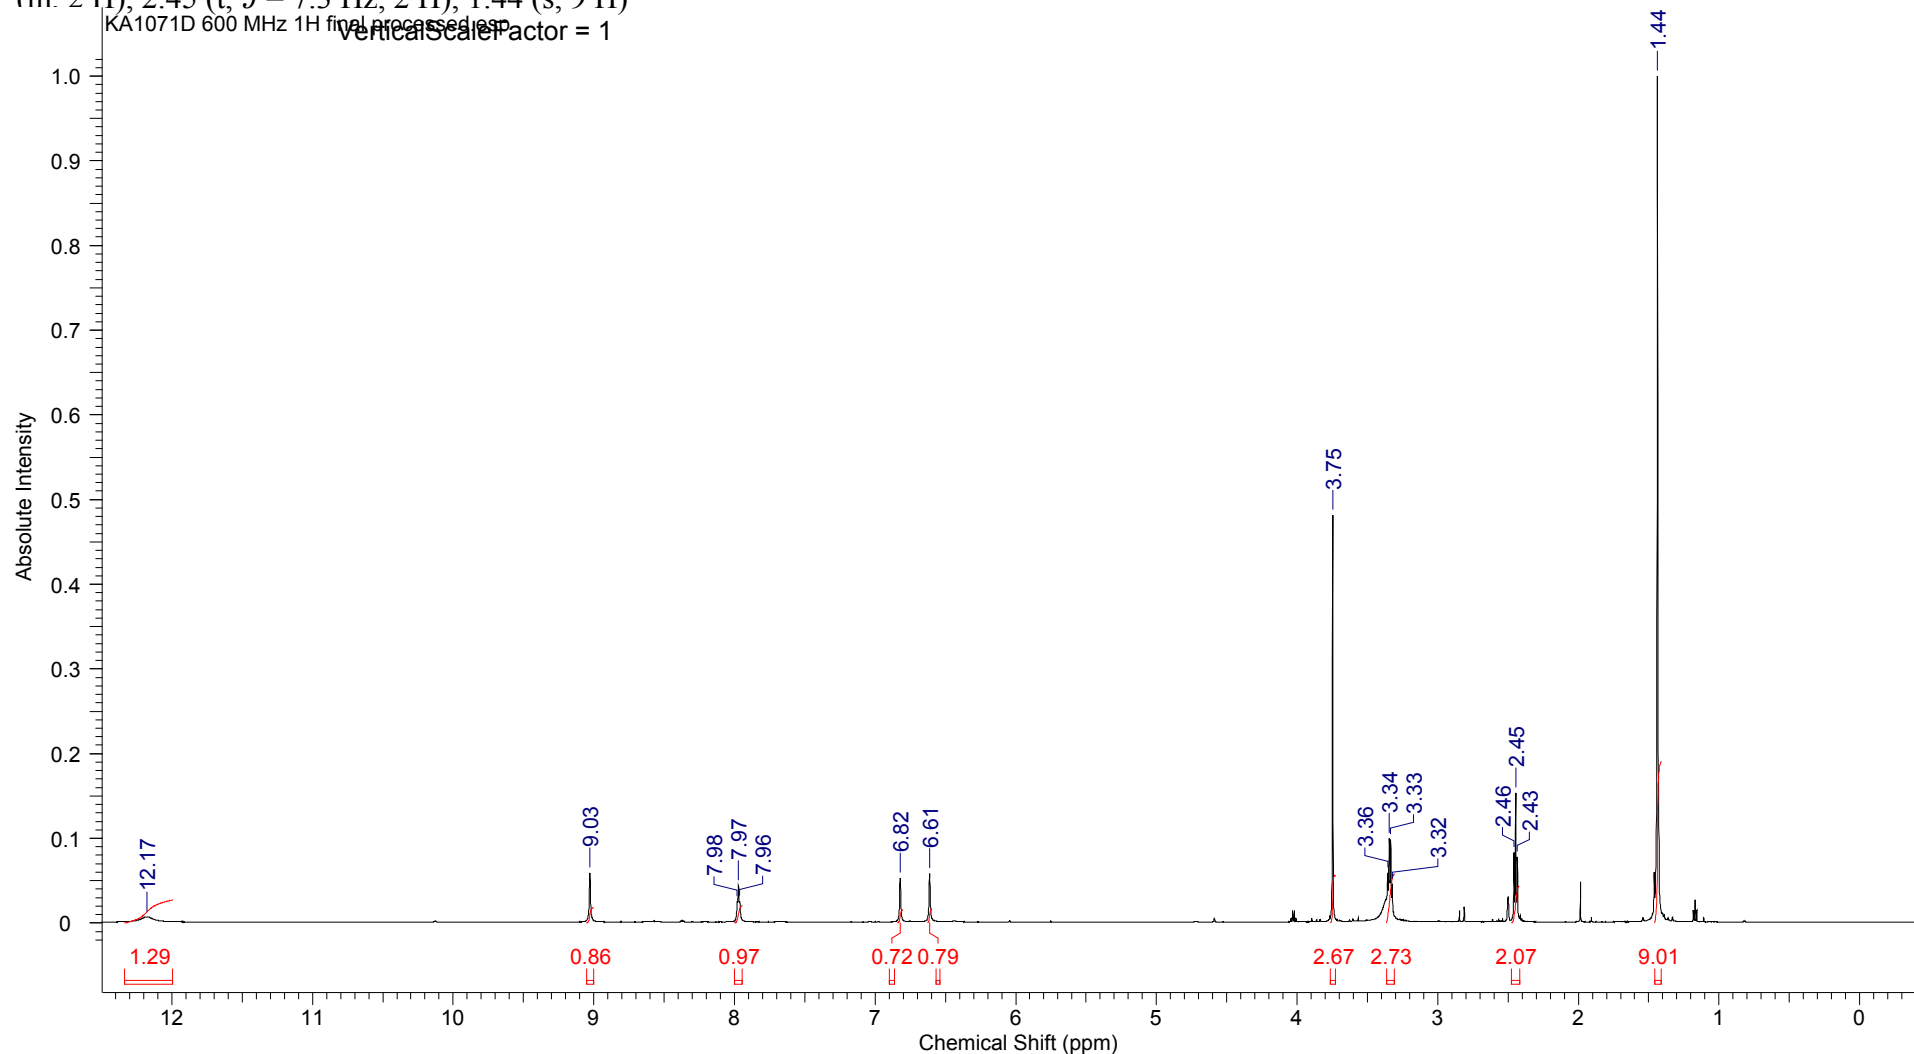



# KA1071D

3/25/2014 2:12:52 PM  
ka1071d

|                               |                                                                                              |                             |          |                               |                        |                             |             |
|-------------------------------|----------------------------------------------------------------------------------------------|-----------------------------|----------|-------------------------------|------------------------|-----------------------------|-------------|
| <b>Acquisition Time (sec)</b> | 0.8651                                                                                       | <b>Comment</b>              | ka1071d  | <b>Date</b>                   | Mar 17 2014            | <b>Date Stamp</b>           | Mar 17 2014 |
| <b>File Name</b>              | \\stl.umsl.edu\deptshare\sh_nmrdata\Agilent600\bashkin\ka1071d_20140317_01\CARBON_01.fid\fid |                             |          |                               | <b>Frequency (MHz)</b> | 150.83                      |             |
| <b>Nucleus</b>                | 13C                                                                                          | <b>Number of Transients</b> | 2000     | <b>Original Points Count</b>  | 32768                  | <b>Points Count</b>         | 32768       |
| <b>Pulse Sequence</b>         | s2pul                                                                                        | <b>Receiver Gain</b>        | 30.00    | <b>Solvent</b>                | DMSO-d6                | <b>Spectrum Offset (Hz)</b> | 16121.1680  |
| <b>Spectrum Type</b>          | STANDARD                                                                                     | <b>Sweep Width (Hz)</b>     | 37878.79 | <b>Temperature (degree C)</b> | 23.000                 |                             |             |

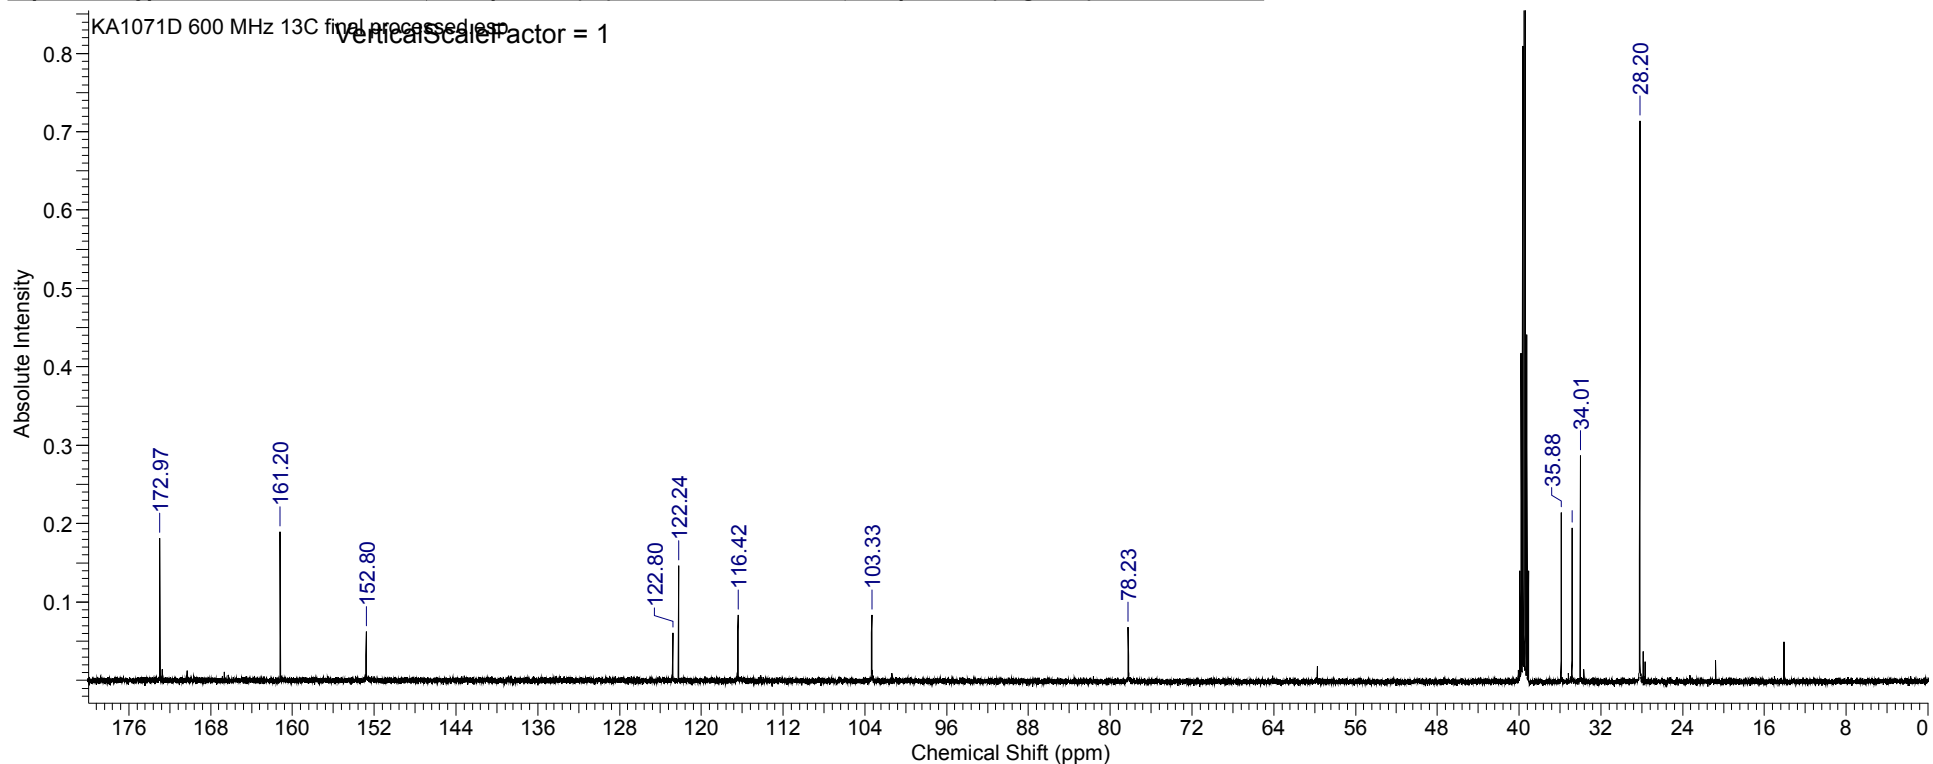

| (ppm) | (Hz)    | (ppm) | (Hz)    | (ppm) | (Hz)    | (ppm) | (Hz)    | (ppm) | (Hz)   | (ppm) | (Hz)   |
|-------|---------|-------|---------|-------|---------|-------|---------|-------|--------|-------|--------|
| 173.0 | 26088.8 | 152.8 | 23046.2 | 122.2 | 18437.2 | 103.3 | 15585.4 | 35.9  | 5412.5 | 34.0  | 5130.5 |
| 161.2 | 24313.2 | 122.8 | 18521.6 | 116.4 | 17559.8 | 78.2  | 11799.4 | 34.8  | 5251.8 | 28.2  | 4253.1 |

# KA1173B

3/21/2014 5:10:41 PM  
ka1173b

|                        |                                                                               |                      |         |                        |                 |                      |             |
|------------------------|-------------------------------------------------------------------------------|----------------------|---------|------------------------|-----------------|----------------------|-------------|
| Acquisition Time (sec) | 1.7039                                                                        | Comment              | ka1173b | Date                   | Mar 21 2014     | Date Stamp           | Mar 21 2014 |
| File Name              | \\stl.umsl.edu\deptshare\sh_nmrdata\Agilent600\bashkin\ka1173b-proton.fid\fid |                      |         |                        | Frequency (MHz) | 599.78               |             |
| Nucleus                | 1H                                                                            | Number of Transients | 32      | Original Points Count  | 16384           | Points Count         | 16384       |
| Pulse Sequence         | s2pul                                                                         | Receiver Gain        | 30.00   | Solvent                | DMSO-d6         | Spectrum Offset (Hz) | 3609.6973   |
| Spectrum Type          | STANDARD                                                                      | Sweep Width (Hz)     | 9615.38 | Temperature (degree C) | 23.000          |                      |             |

<sup>1</sup>H NMR (600MHz, DMSO-d<sub>6</sub>) δ = 12.16 (s, 1 H), 9.83 (s, 1 H), 7.28 (s, 1 H), 6.80 (s, 1 H), 6.65 (d, J = 1.8 Hz, 1 H), 3.79 (d, J = 1.0 Hz, 3 H), 3.20 - 3.14 (m, 2 H), 2.37 (t, J = 7.3 Hz, 2 H), 1.37 (s, 9 H)

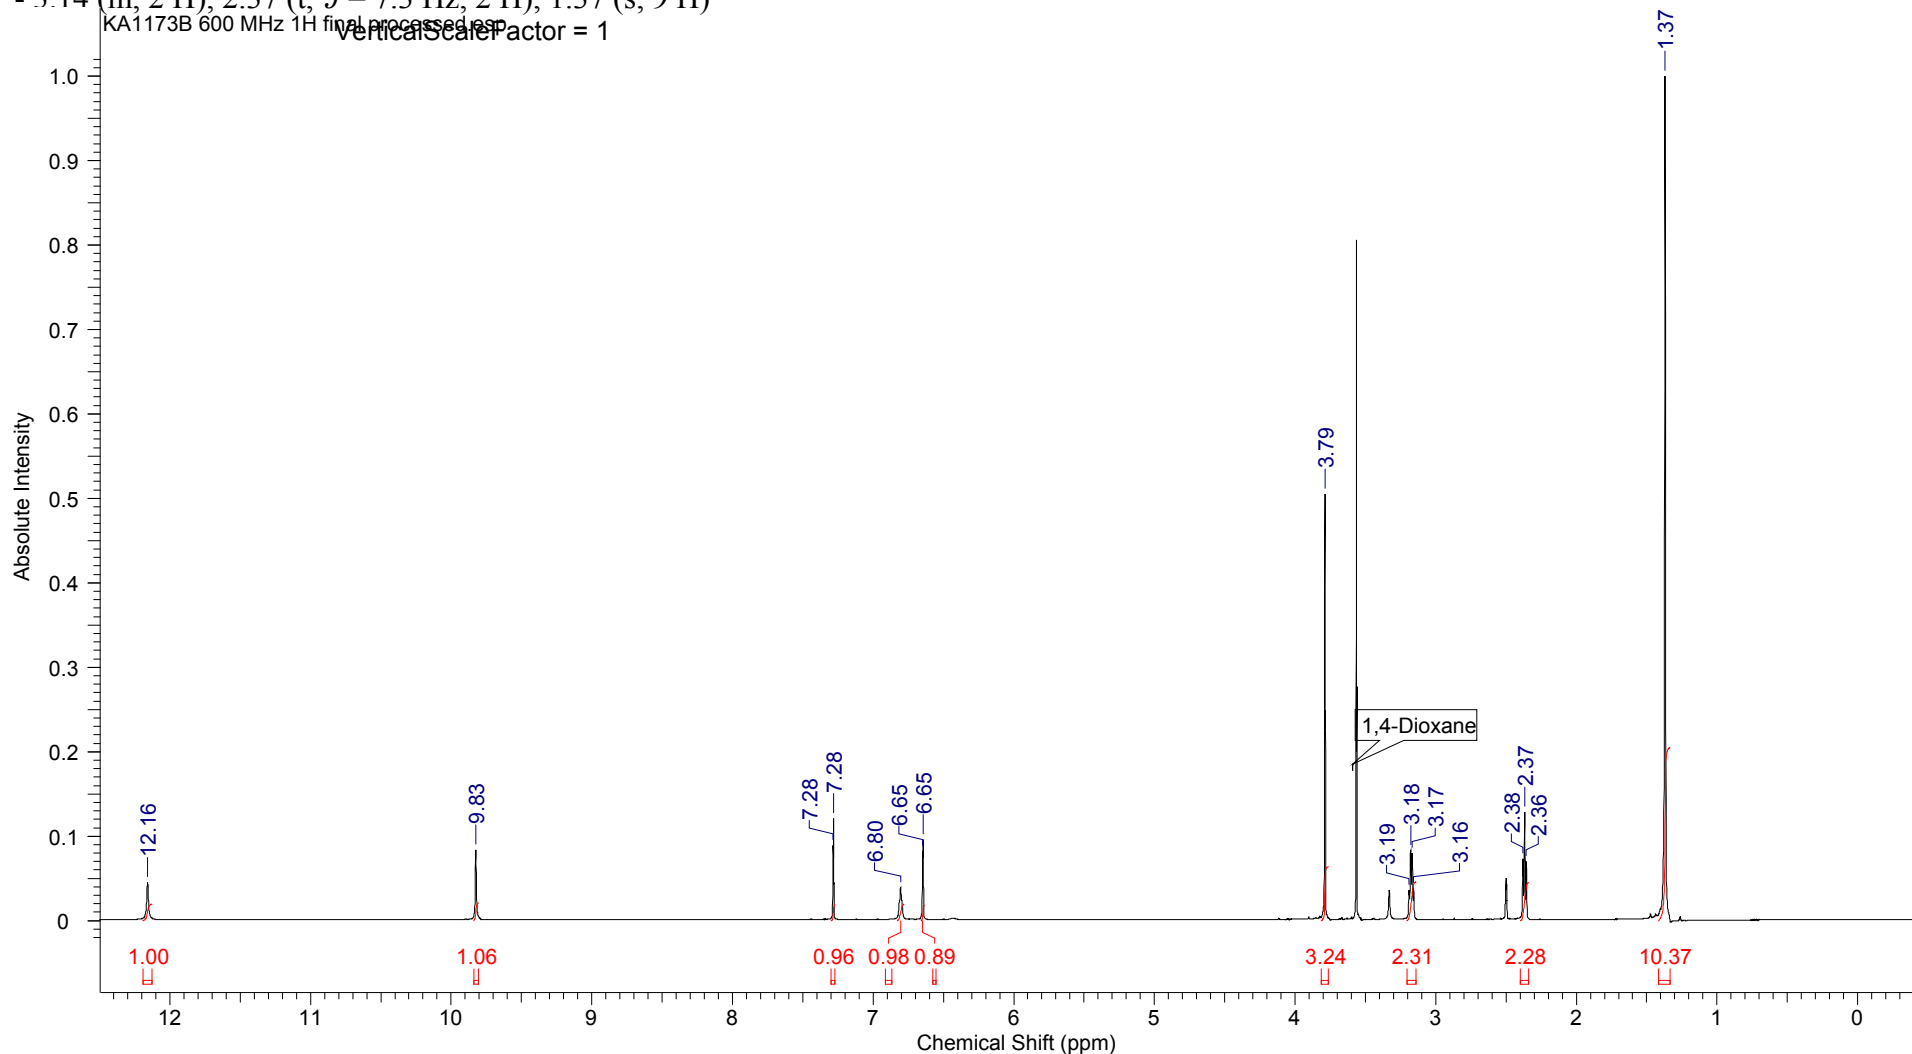

# KA1173B

3/21/2014 5:06:21 PM  
ka1173b

|                               |                                                                                              |                             |          |                               |                        |                             |             |
|-------------------------------|----------------------------------------------------------------------------------------------|-----------------------------|----------|-------------------------------|------------------------|-----------------------------|-------------|
| <b>Acquisition Time (sec)</b> | 0.8651                                                                                       | <b>Comment</b>              | ka1173b  | <b>Date</b>                   | Mar 17 2014            | <b>Date Stamp</b>           | Mar 17 2014 |
| <b>File Name</b>              | \\stl.umsl.edu\deptshare\sh_nmrdata\Agilent600\bashkin\ka1173b_20140317_01\CARBON_01.fid\fid |                             |          |                               | <b>Frequency (MHz)</b> | 150.83                      |             |
| <b>Nucleus</b>                | 13C                                                                                          | <b>Number of Transients</b> | 2000     | <b>Original Points Count</b>  | 32768                  | <b>Points Count</b>         | 32768       |
| <b>Pulse Sequence</b>         | s2pul                                                                                        | <b>Receiver Gain</b>        | 30.00    | <b>Solvent</b>                | DMSO-d6                | <b>Spectrum Offset (Hz)</b> | 16121.1680  |
| <b>Spectrum Type</b>          | STANDARD                                                                                     | <b>Sweep Width (Hz)</b>     | 37878.79 | <b>Temperature (degree C)</b> | 23.000                 |                             |             |

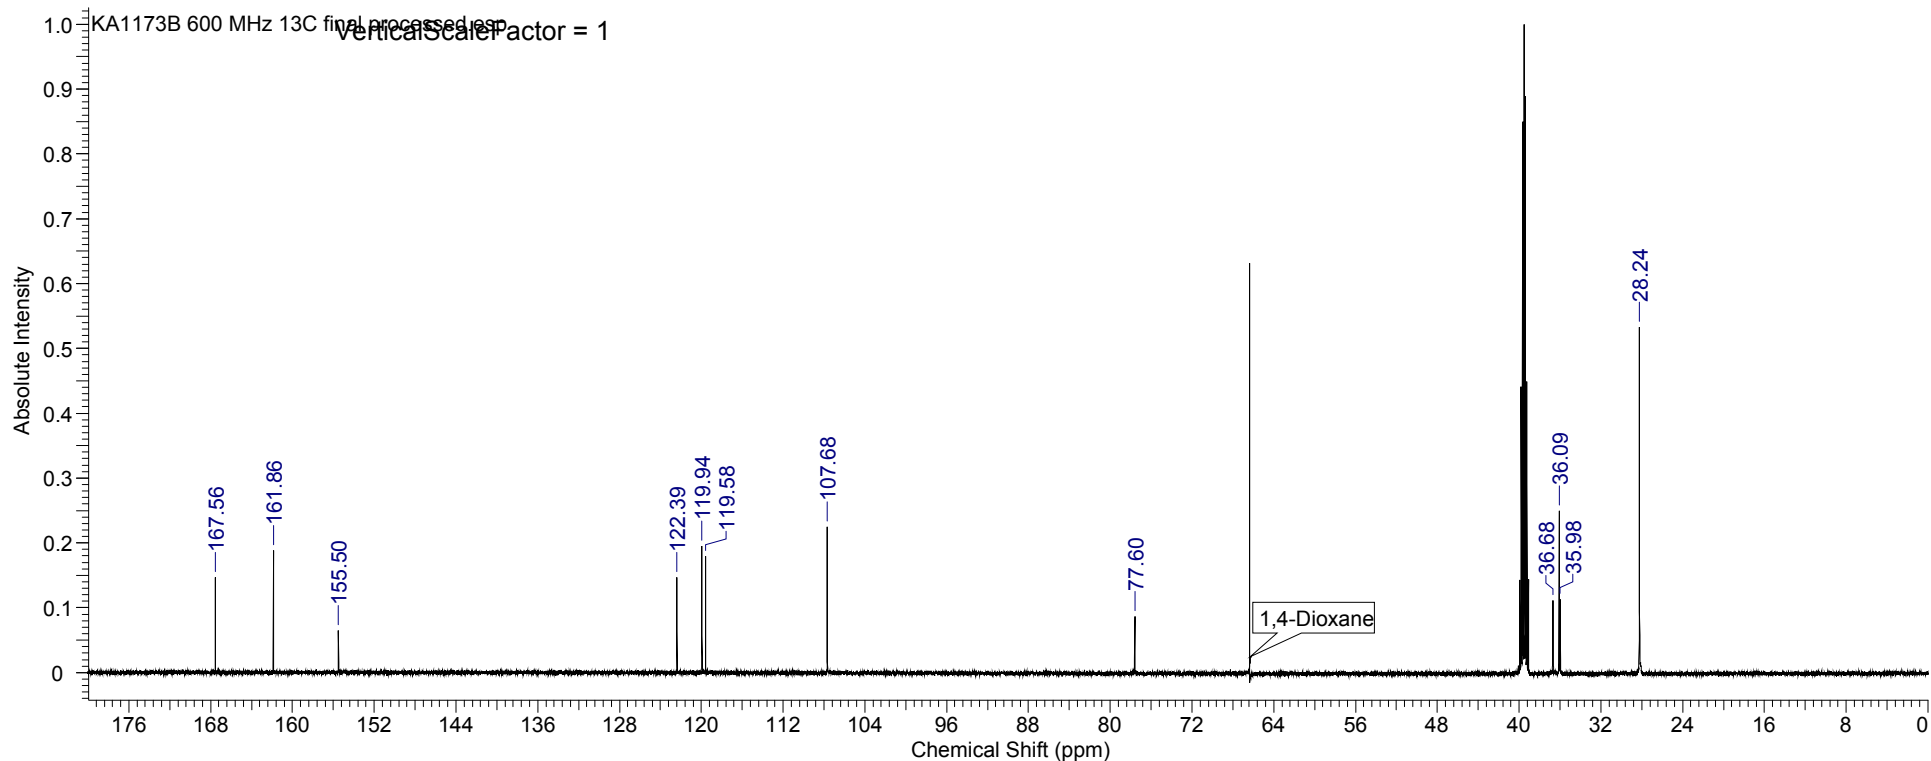

| (ppm) | (Hz)    | (ppm) | (Hz)    | (ppm) | (Hz)    | (ppm) | (Hz)    | (ppm) | (Hz)   | (ppm) | (Hz)   |
|-------|---------|-------|---------|-------|---------|-------|---------|-------|--------|-------|--------|
| 167.6 | 25272.7 | 155.5 | 23454.3 | 119.9 | 18090.4 | 107.7 | 16242.0 | 36.7  | 5532.7 | 36.0  | 5426.4 |
| 161.9 | 24413.8 | 122.4 | 18460.3 | 119.6 | 18036.1 | 77.6  | 11704.7 | 36.1  | 5443.7 | 28.2  | 4258.8 |
